# Supplementary material for: Novel approach towards the synthesis of skeletally diverse benzimidazole-pyrrolo[1,2-a]quinoxaline by SNAr/Pictet–Spengler reaction under focused microwave irradiation
Source: Royal Society of Chemistry journal article supplement (doi:10.1039/c1nj20153k), 2011-01-01
Supplement: c1nj20153k.pdf [file c1nj20153k.pdf]

## Supporting Information

### Novel Approach Toward Synthesis of Skeletally Diverse

### Benzimidazole-pyrrolo[1,2-a]quinoxalines by $S_NAr$ / Pictet-Spengler

### Reaction Under Focused Microwave Irradiation

Barnali Maiti, Chung-Ming Sun\*

*Department of Applied Chemistry, National Chiao Tung University, Hsinchu 300-10,*

*Taiwan*

Email: [cmsun@mail.nctu.edu.tw](mailto:cmsun@mail.nctu.edu.tw)

#### **Table of Contents**

|                                                                                               |                  |
|-----------------------------------------------------------------------------------------------|------------------|
| <i>General Methods</i> .....                                                                  | <i>S1</i>        |
| <i><sup>1</sup>H and <sup>13</sup>C NMR spectra of Compounds 10a-10r</i> .....                | <i>S2-S37</i>    |
| <i>Crude HPLC Spectra of Compounds 10a-10r</i> .....                                          | <i>S38-S55</i>   |
| <i>IR Spectra of Compounds 10a-10r</i> .....                                                  | <i>S56-S73</i>   |
| <i>LR and HR Mass spectra of Compounds 10a-10r</i> .....                                      | <i>S74-S109</i>  |
| <i><sup>1</sup>H NMR stepwise intermediate spectra of Compounds 6i-10i</i> ...                | <i>S110-S114</i> |
| <i>X ray crystallographic data of compound 10h</i> .....                                      | <i>S115-S139</i> |
| <i>General Procedure for the Synthesis of Polymer bound intermediate 6</i> .....              | <i>S140-S143</i> |
| <i><sup>1</sup>H and <sup>13</sup>C NMR,, Mass and IR spectra of Compounds 14-17</i><br>..... | <i>S144-S159</i> |
| <i>General Procedure for the synthesis of compounds 11-17</i> ...                             | <i>S160-S164</i> |

## General Methods

Dichloromethane and chloroform was distilled from calcium hydride before use. All reactions were performed under an inert atmosphere with unpurified reagents and dry solvents. Analytical thin-layer chromatography (TLC) was performed using 0.25 mm silica gel-coated Kieselgel 60 F254 plates. Flash chromatography was performed using the indicated solvent and silica gel 60 (Merck, 230-400 mesh). All the microwave experiments were conducted in a Biotage initiator sealed vessel under optimized reaction conditions of power and pressure.  $^1\text{H}$  NMR (300 MHz) and  $^{13}\text{C}$  NMR (75 MHz) spectra were recorded on a Bruker DRX-300 spectrometer. Chemical shifts are reported in parts per million (ppm) on the  $\delta$  scale from an internal standard. High-resolution mass spectra (HRMS) were recorded on a JEOL TMS-HX 110 mass spectrometer. Analytical HPLC analyses were recorded with UV detection at  $\lambda=254\text{nm}$  (column: Sphereclone  $5\mu\text{Si}$  (250 x 4.6 mm)).

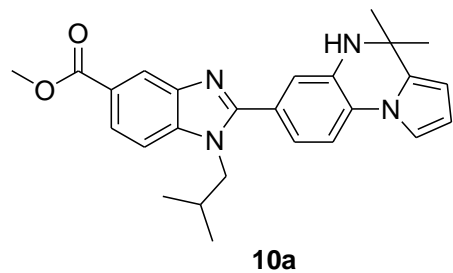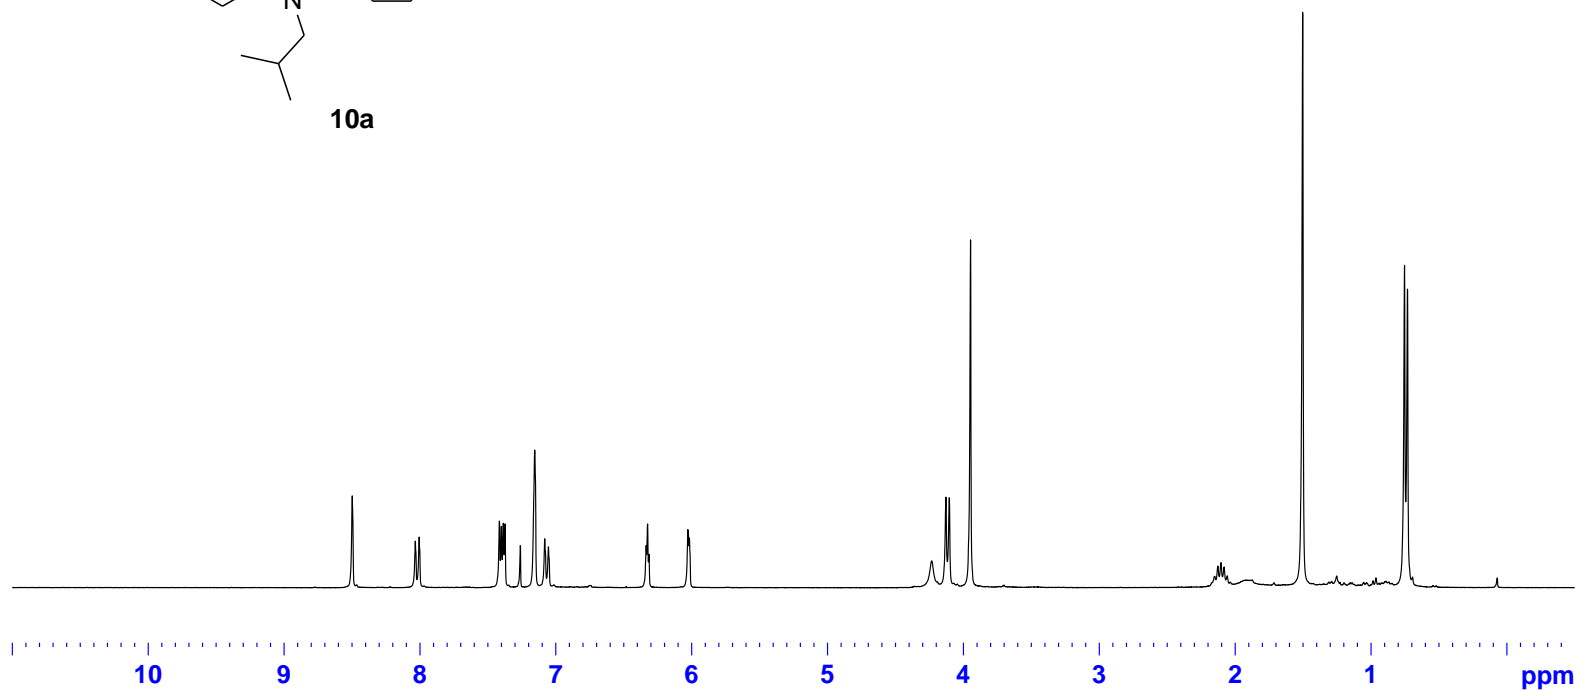

**<sup>1</sup>H NMR spectrum (300 MHz) of compound 10a in CDCl<sub>3</sub>**

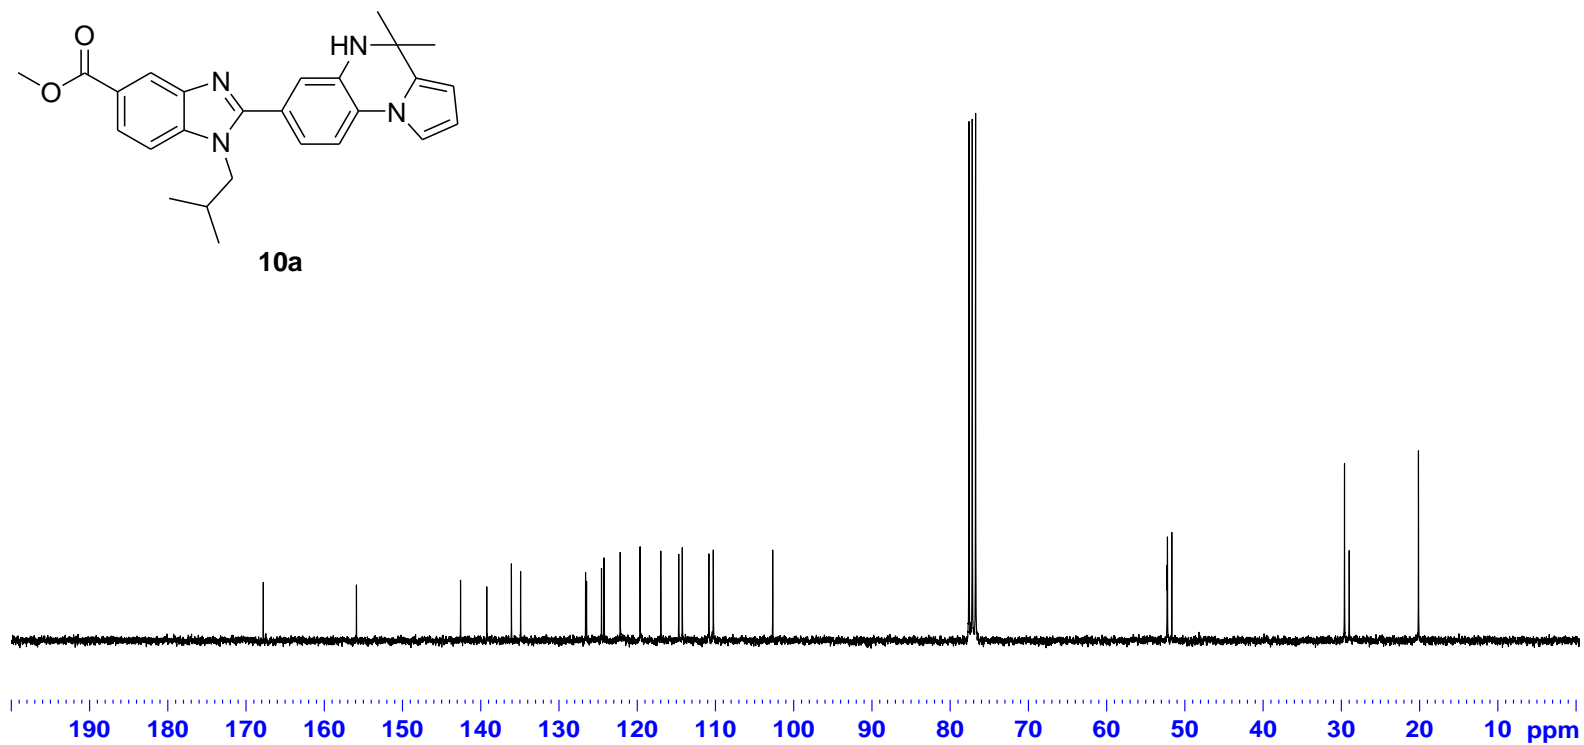

$^{13}\text{C}$  NMR spectrum (75 MHz) of compound 10a in  $\text{CDCl}_3$

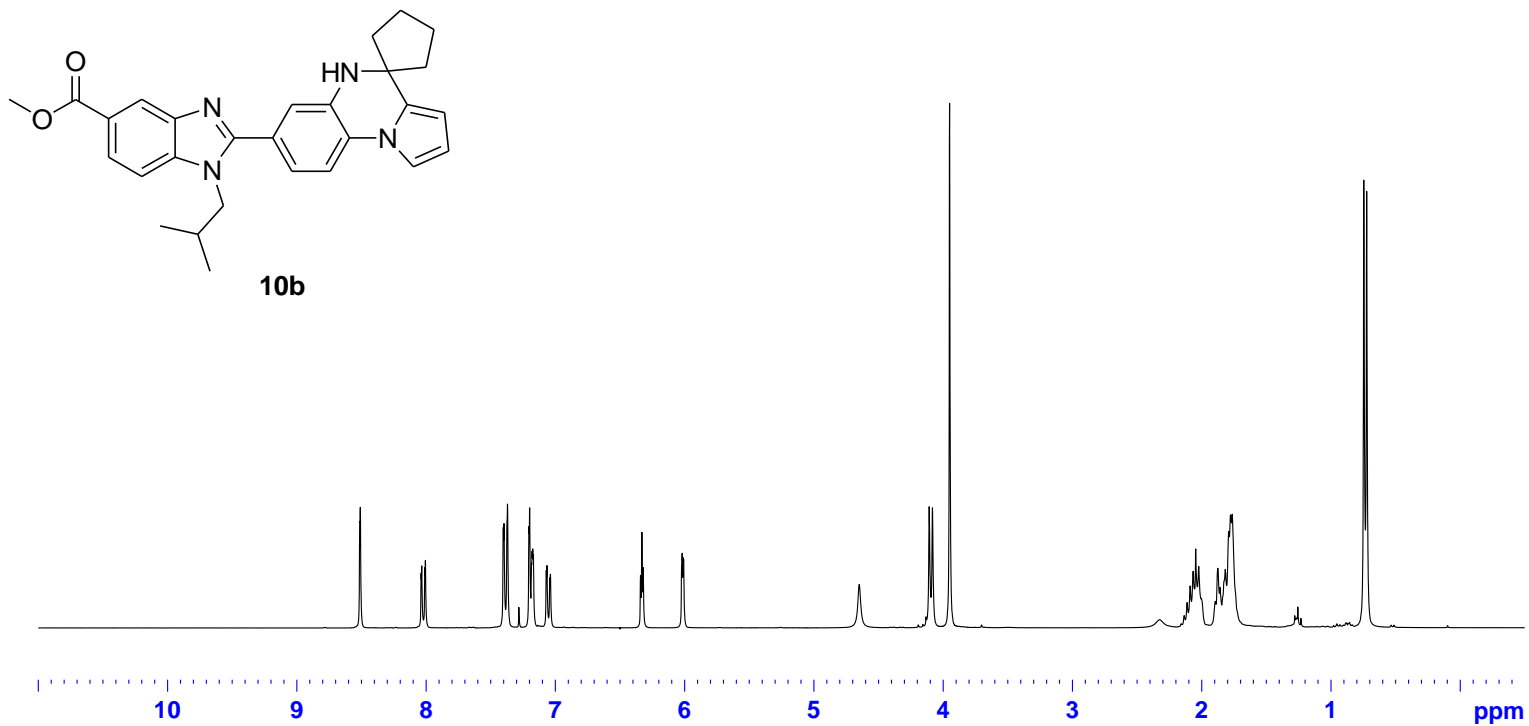

**<sup>1</sup>H NMR spectrum (300 MHz) of compound 10b in CDCl<sub>3</sub>**

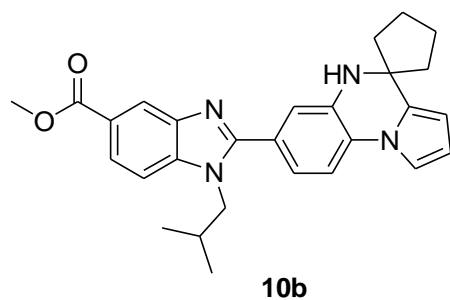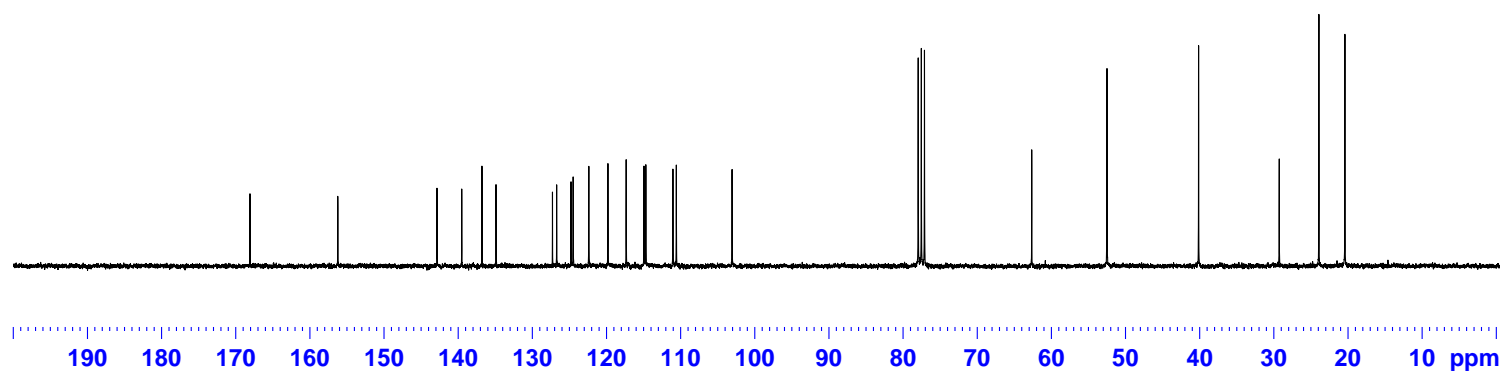

**<sup>13</sup>C NMR spectrum (75 MHz) of compound 10b in CDCl<sub>3</sub>**

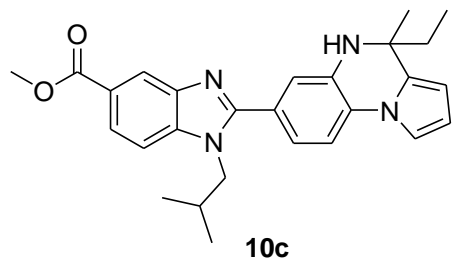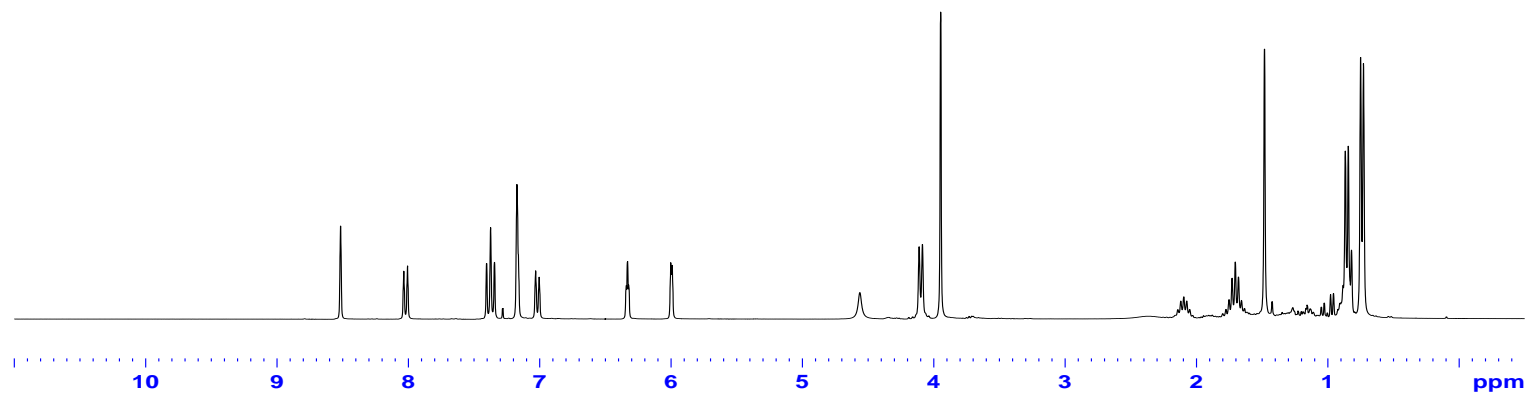

**<sup>1</sup>H NMR spectrum (300 MHz) of compound 10c in CDCl<sub>3</sub>**

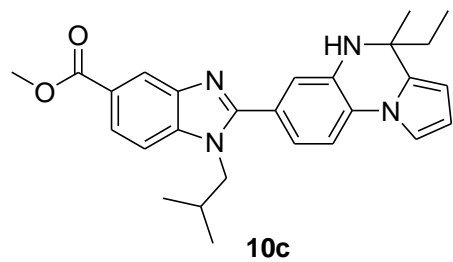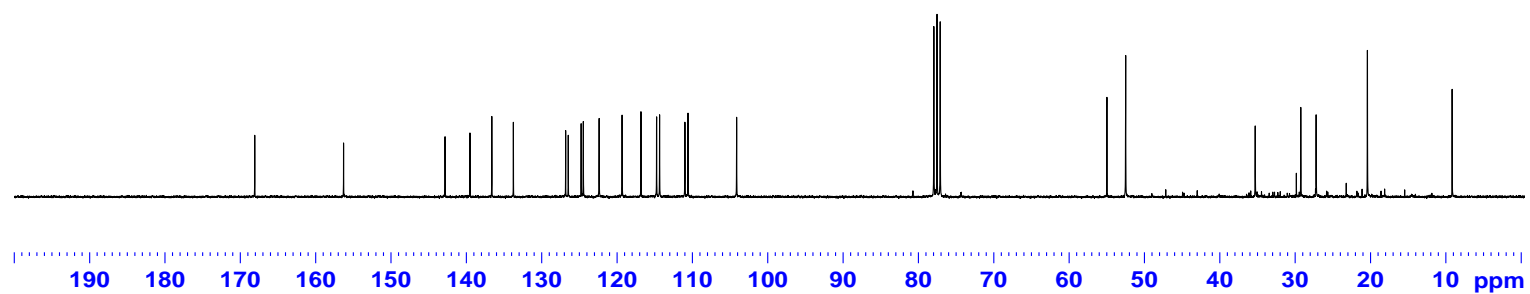

$^{13}\text{C}$  NMR spectrum (75 MHz) of compound 10c in  $\text{CDCl}_3$



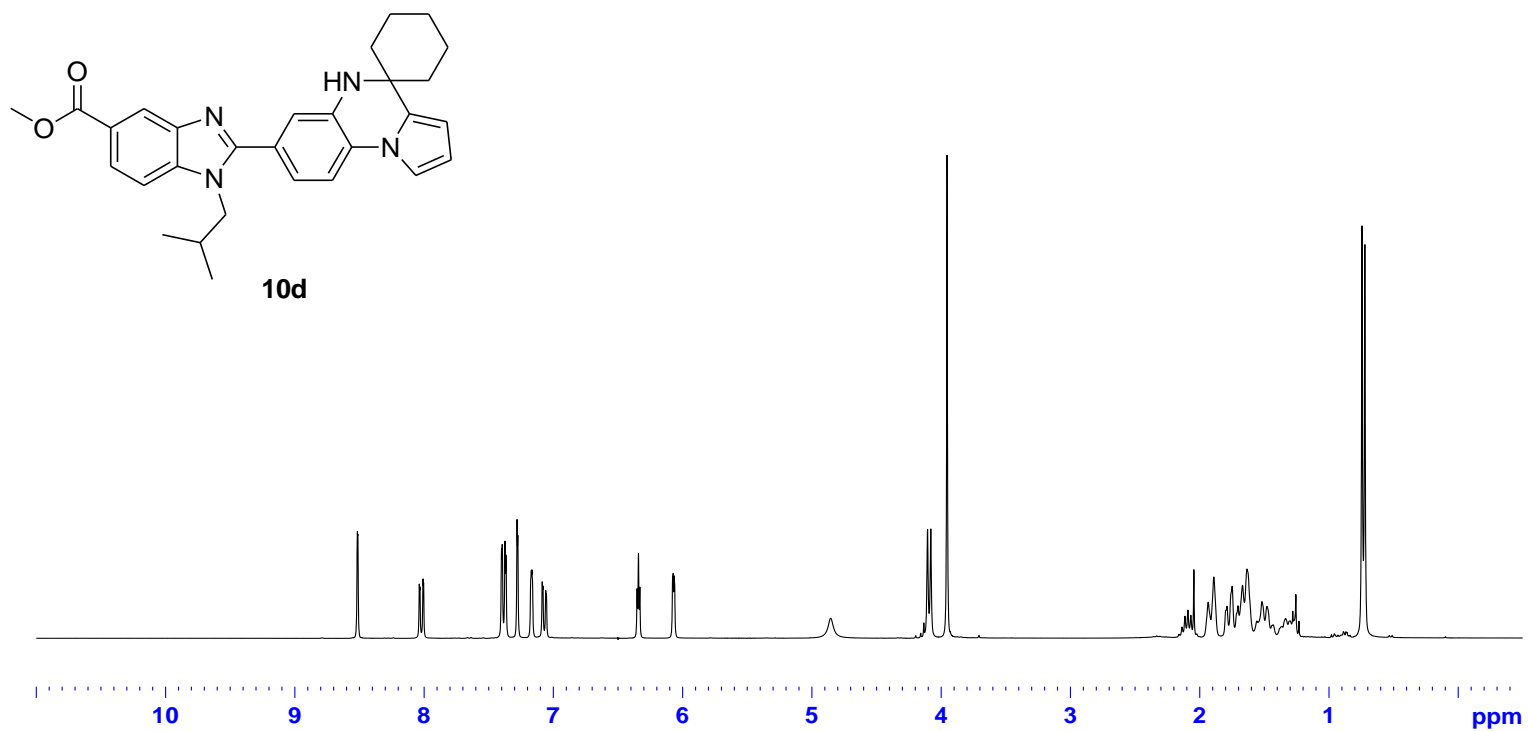

**<sup>1</sup>H NMR spectrum (300 MHz) of compound 10d in CDCl<sub>3</sub>**



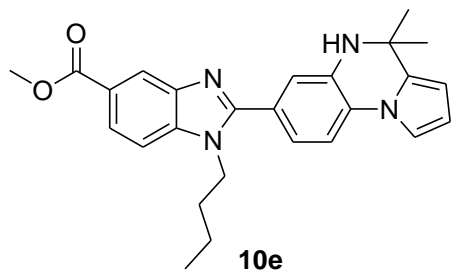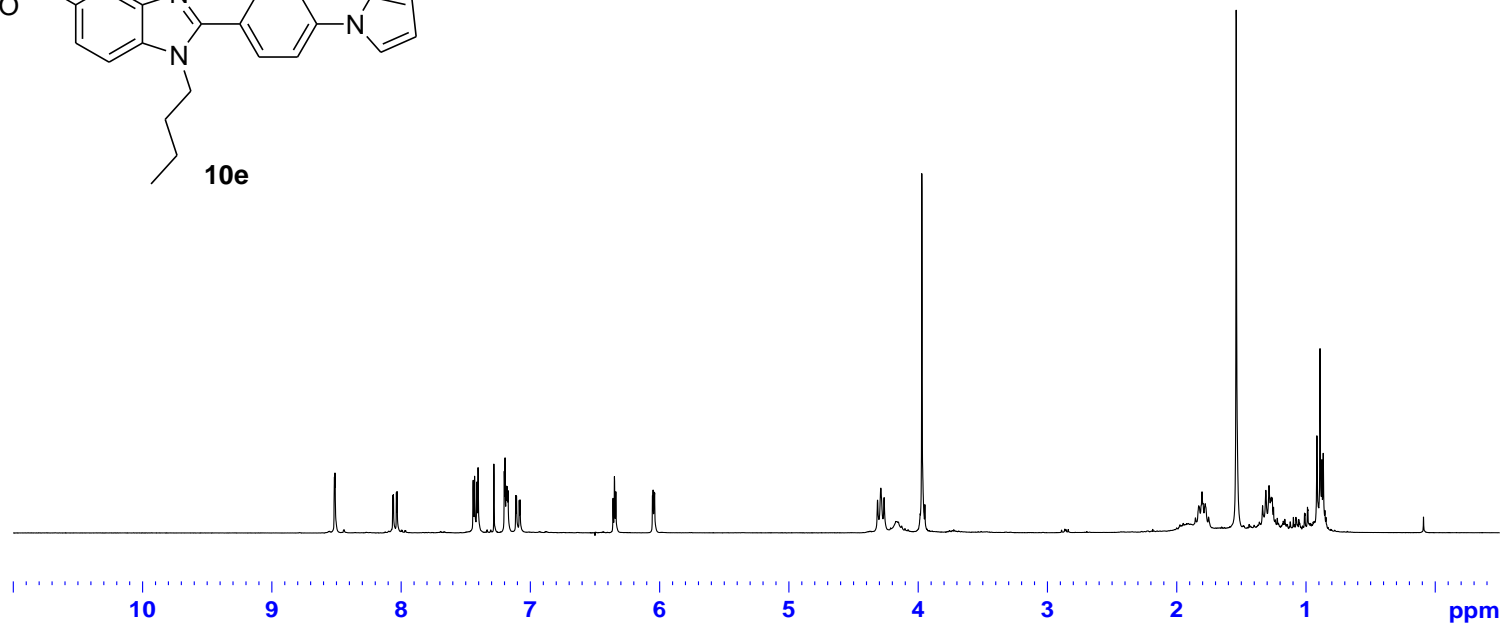

$^1\text{H}$ NMR spectrum (300 MHz) of compound 10e in  $\text{CDCl}_3$

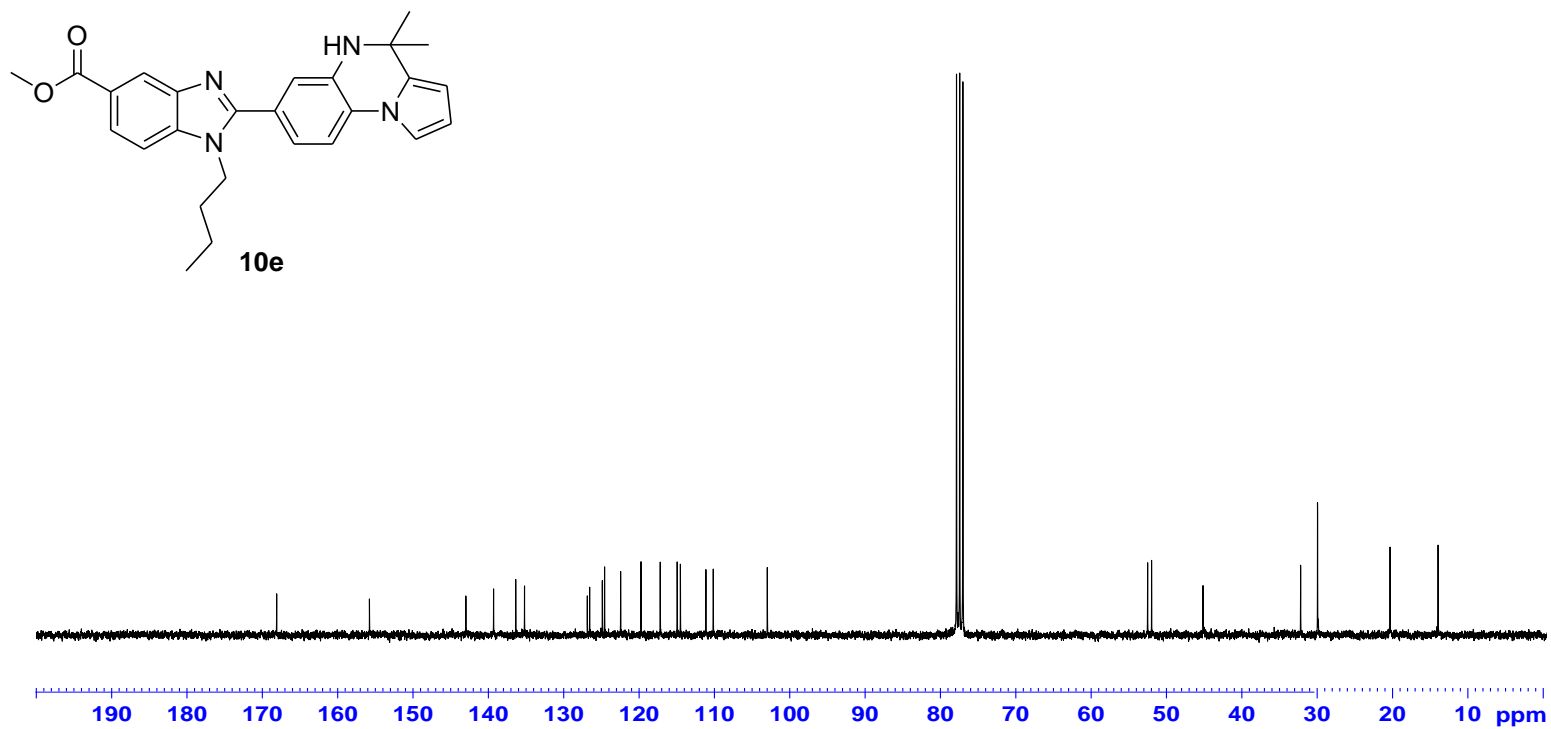

<sup>13</sup>C NMR spectrum (75 MHz) of compound 10e in CDCl<sub>3</sub>

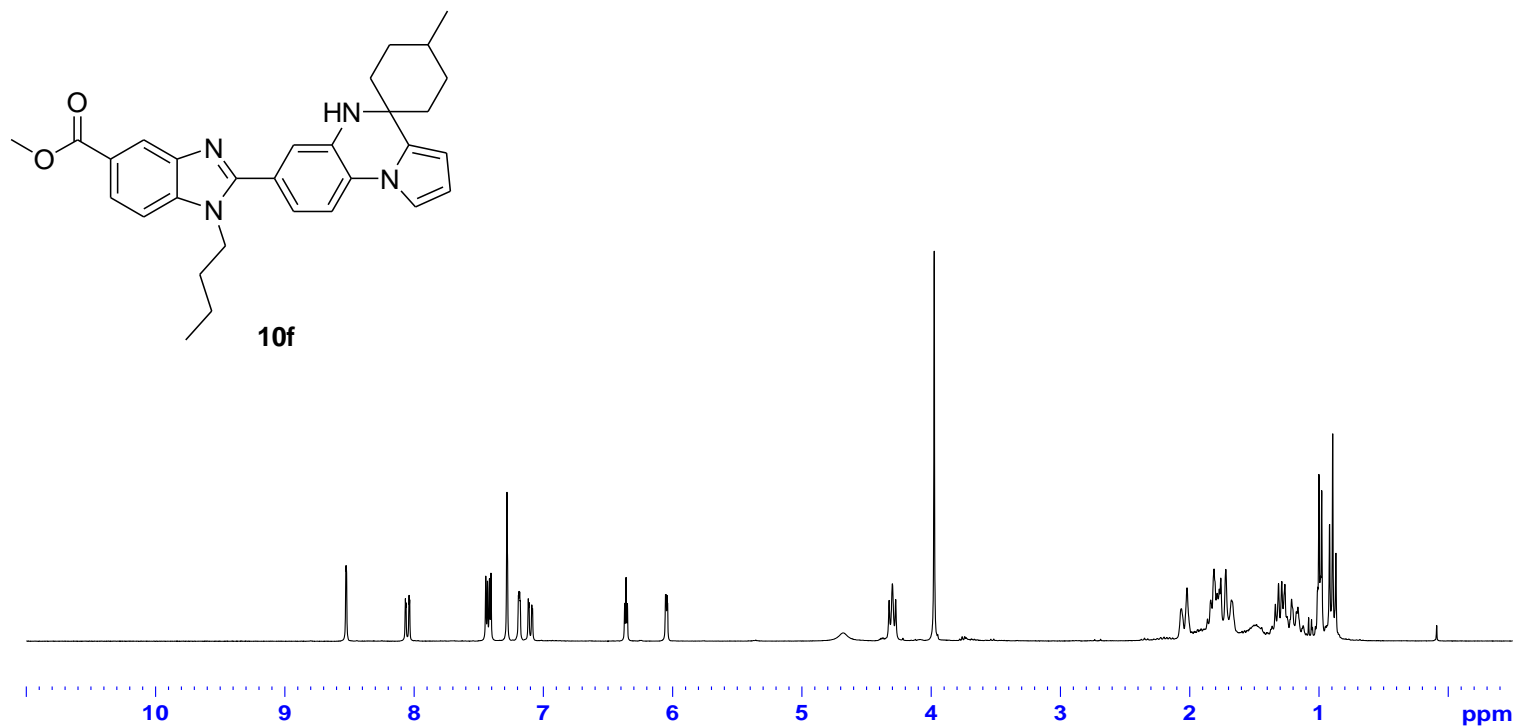

**<sup>1</sup>H NMR spectrum (300 MHz) of compound 10f in CDCl<sub>3</sub>**

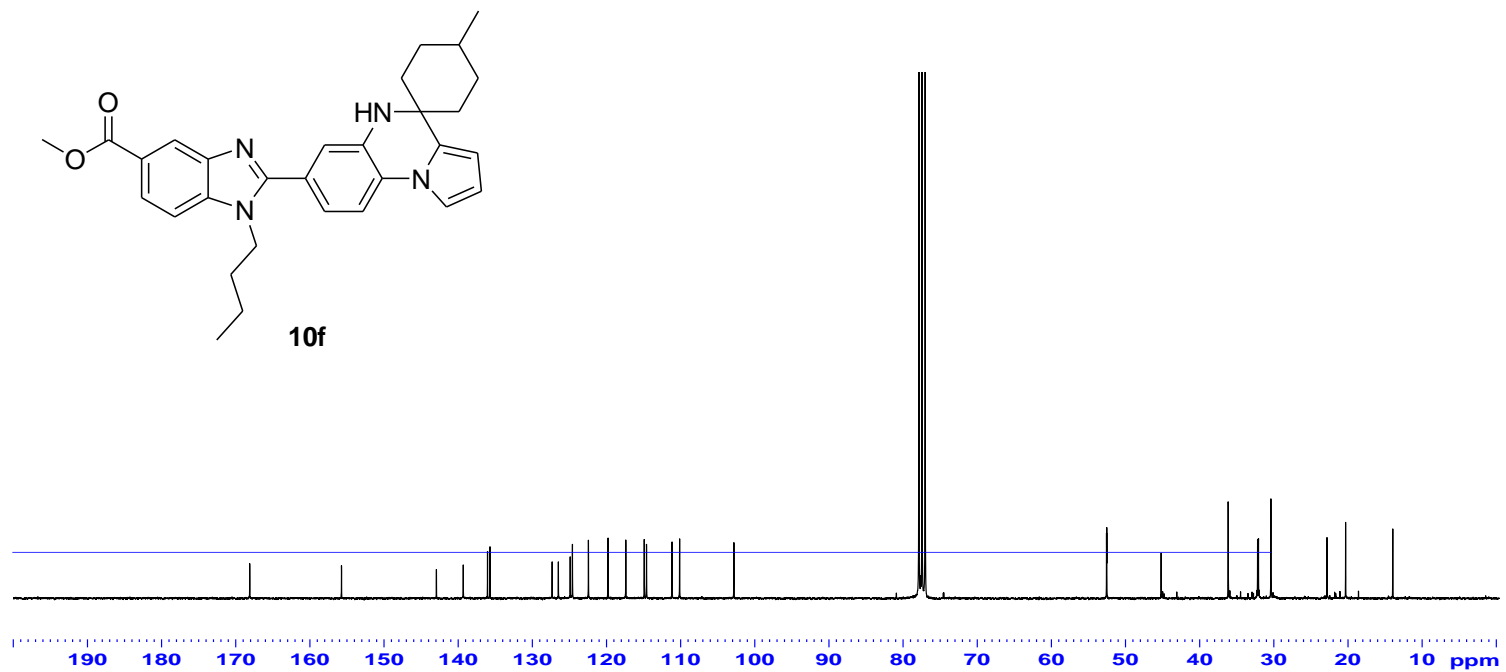

<sup>13</sup>C NMR spectrum (75 MHz) of compound 10f in CDCl<sub>3</sub>

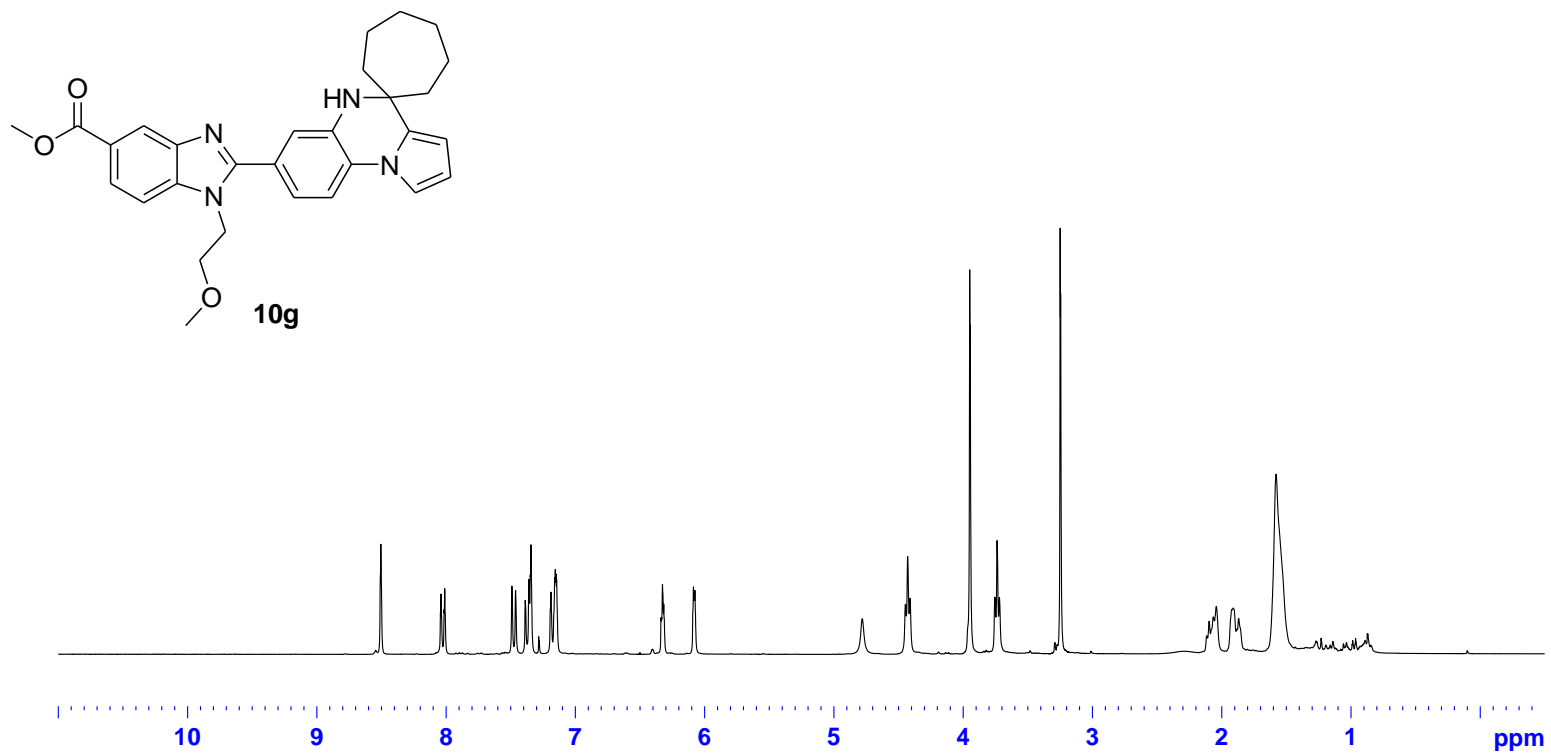

**<sup>1</sup>H NMR spectrum (300 MHz) of compound 10g in CDCl<sub>3</sub>**

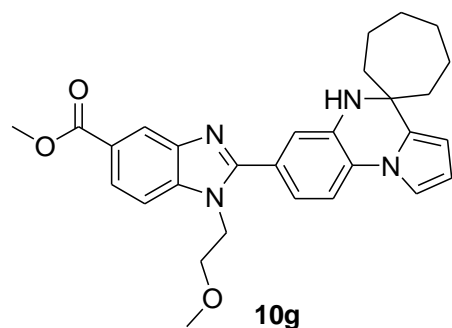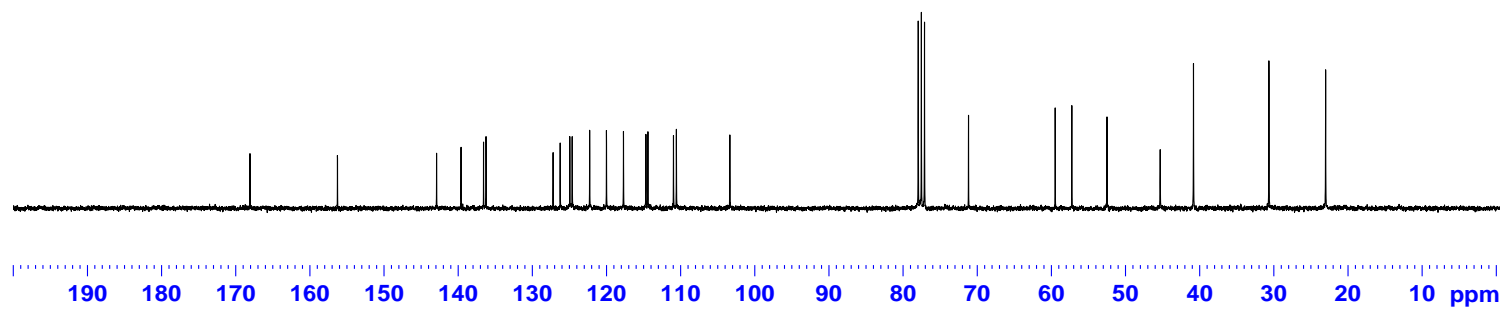

**<sup>13</sup>C NMR spectrum (75 MHz) of compound 10g in CDCl<sub>3</sub>**



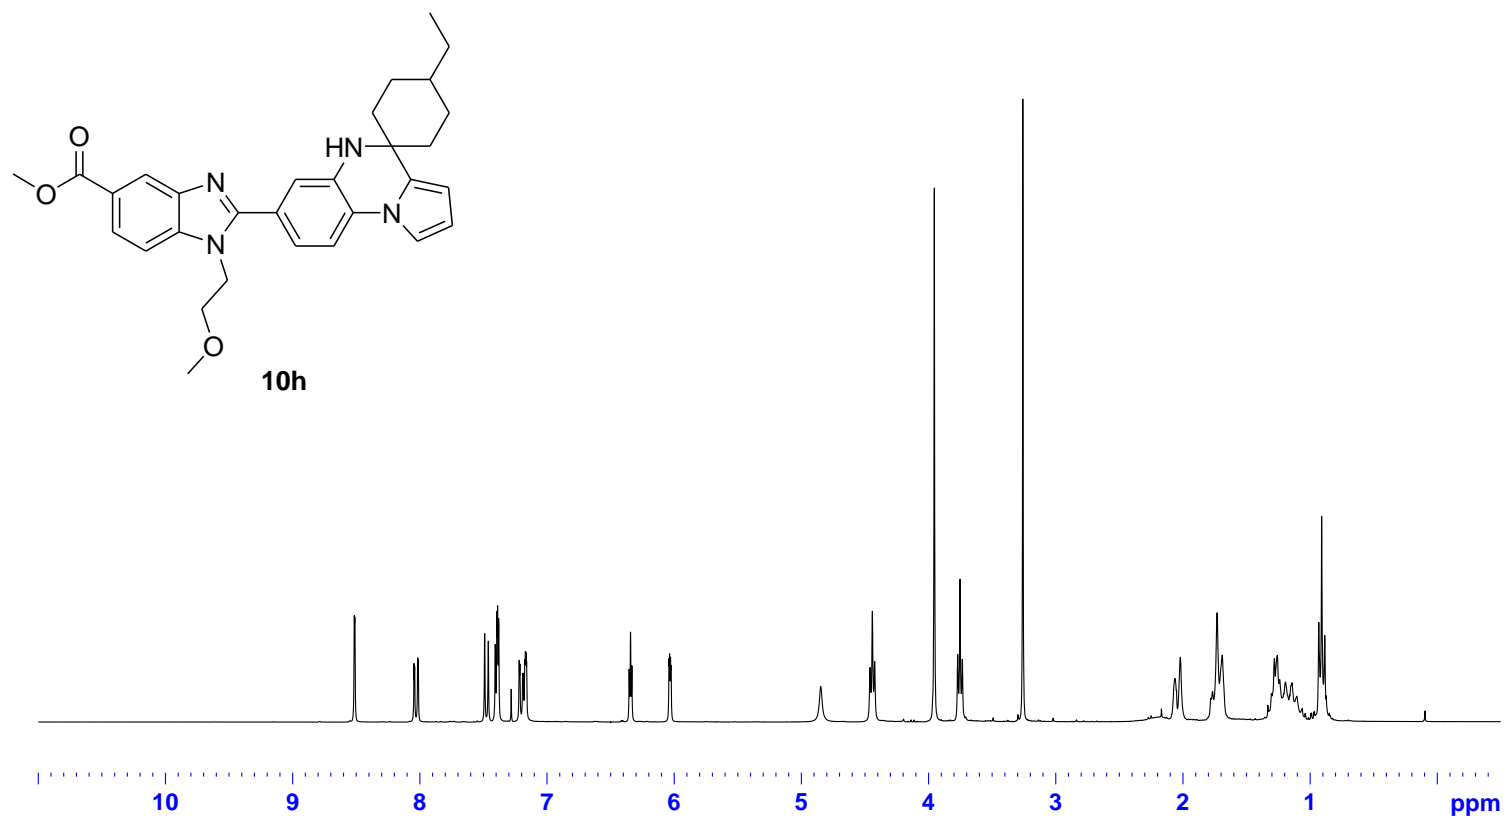

**<sup>1</sup>H NMR spectrum (300 MHz) of compound 10h in CDCl<sub>3</sub>**

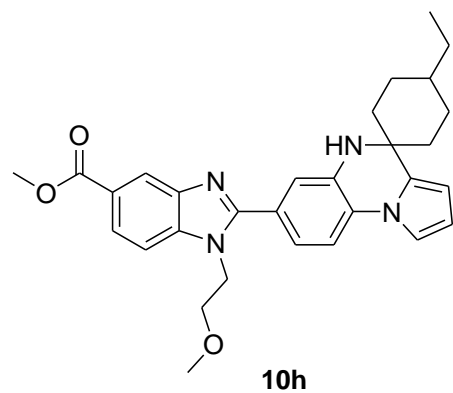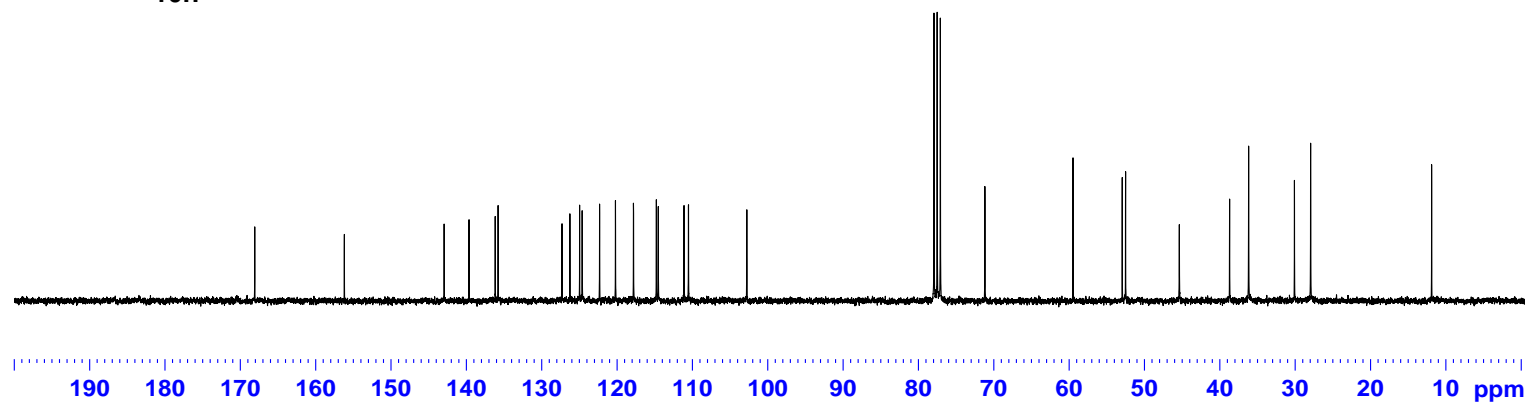

$^{13}\text{C}$  NMR spectrum (75 MHz) of compound 10h in  $\text{CDCl}_3$

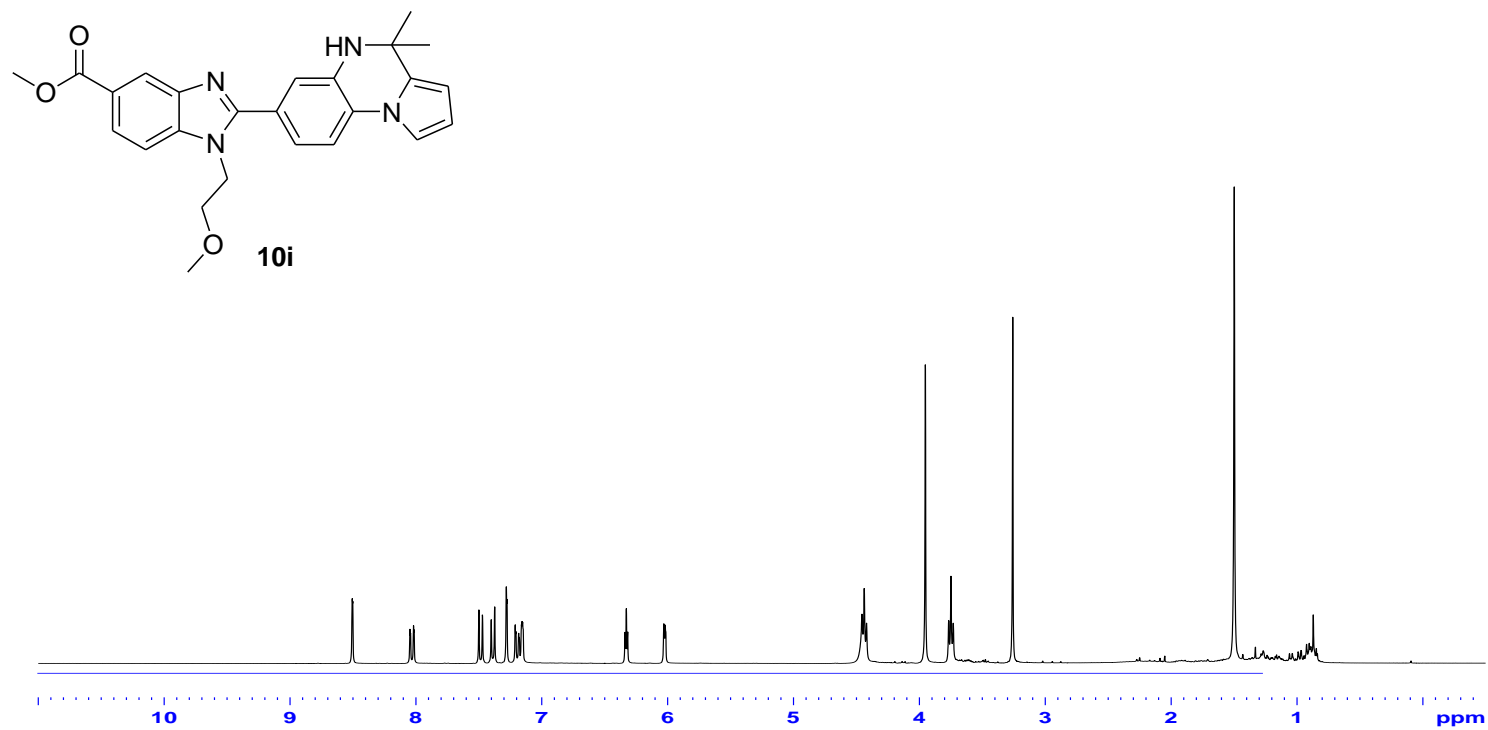

**<sup>1</sup>H NMR spectrum (300 MHz) of compound 10i in CDCl<sub>3</sub>**

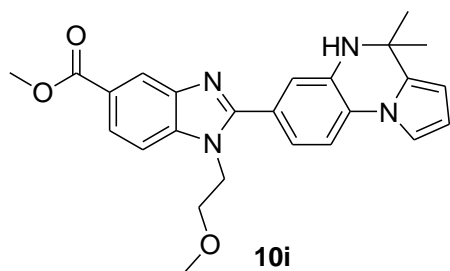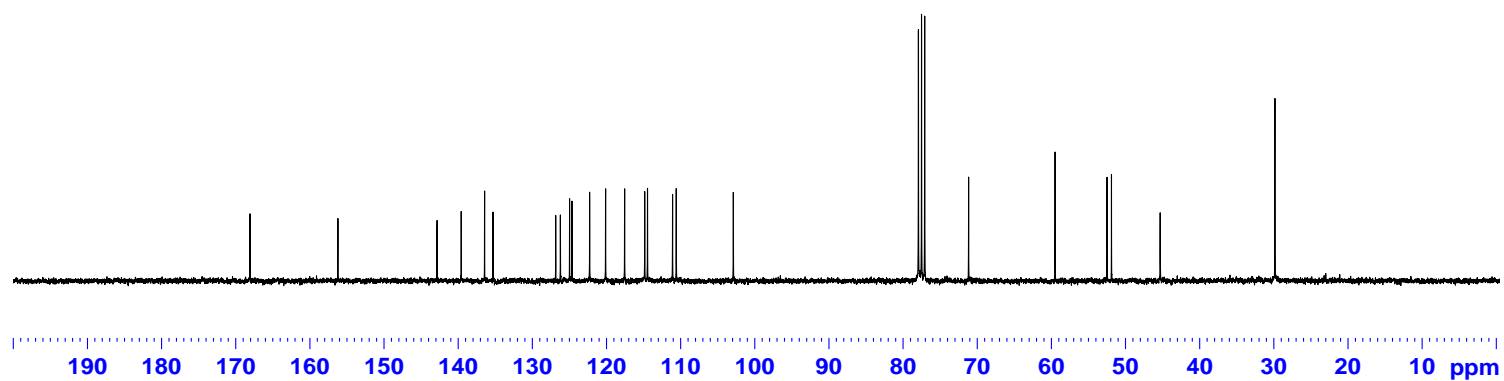

$^{13}\text{C}$  NMR spectrum (75 MHz) of compound 10i in  $\text{CDCl}_3$

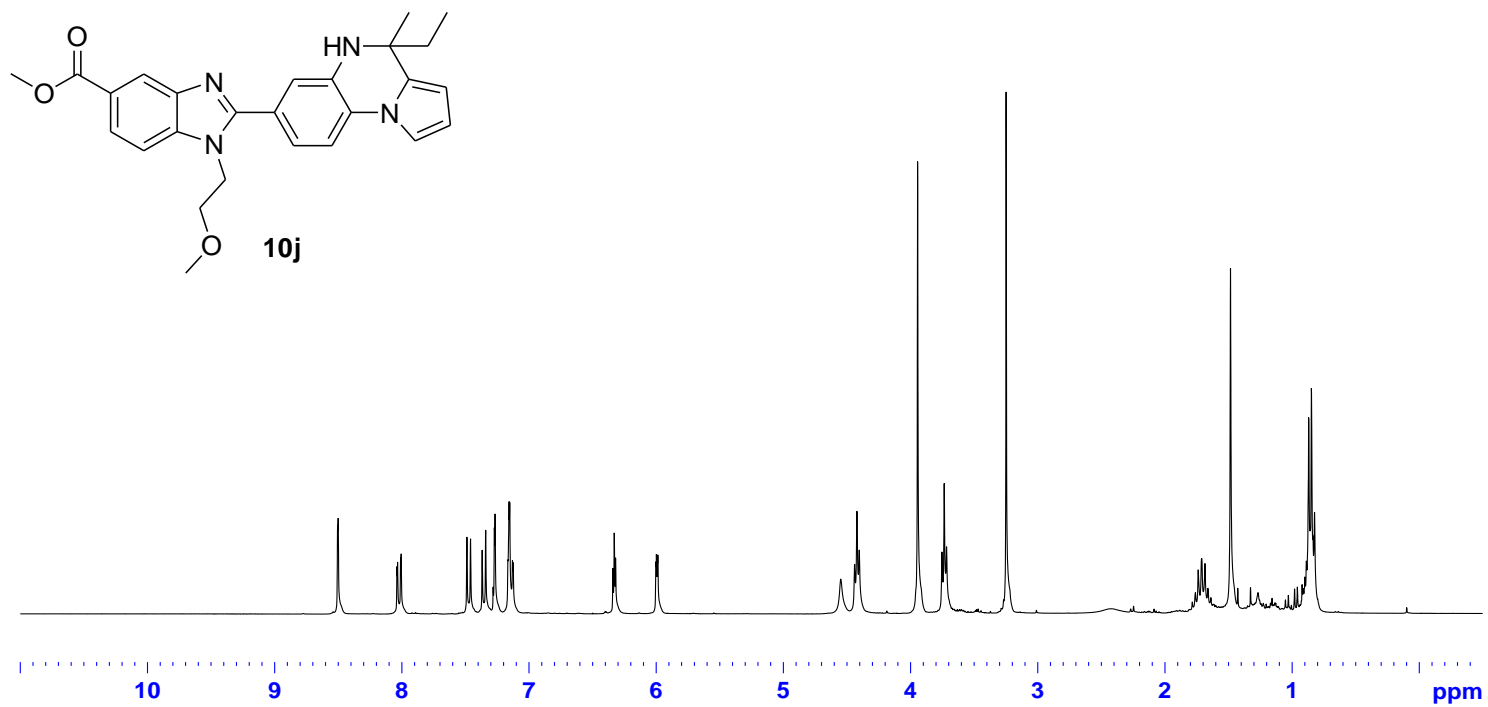

**<sup>1</sup>H NMR spectrum (300 MHz) of compound 10j in CDCl<sub>3</sub>**

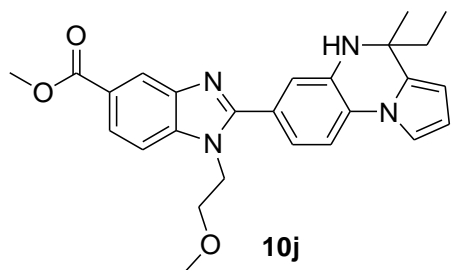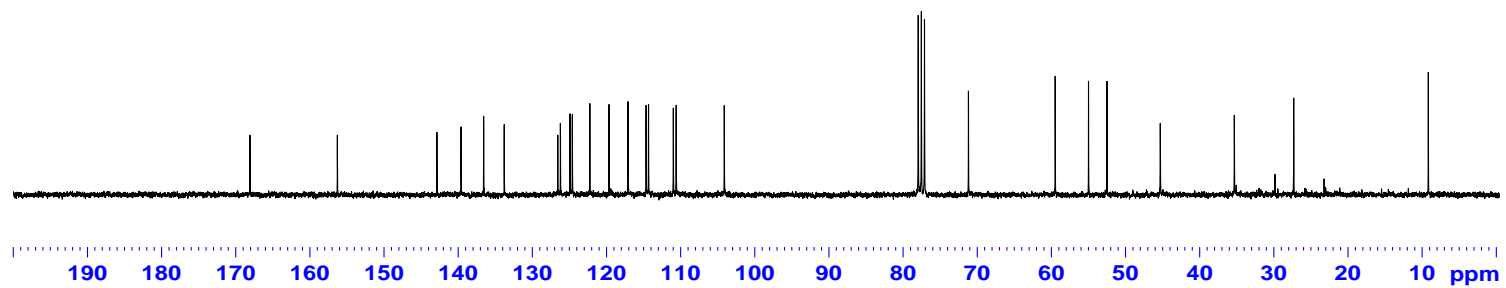

$^{13}\text{C}$  NMR spectrum (75 MHz) of compound 10j in  $\text{CDCl}_3$

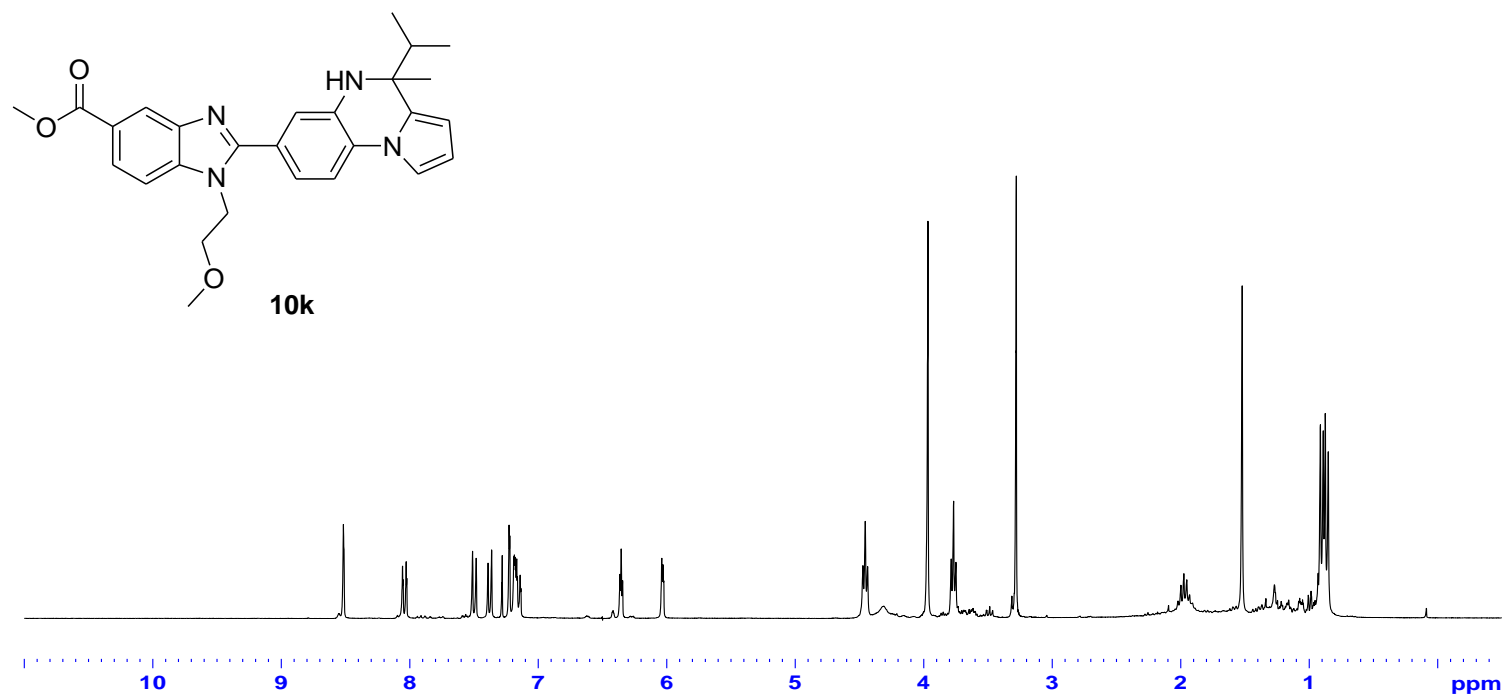

<sup>1</sup>H NMR spectrum (300 MHz) of compound 10k in CDCl<sub>3</sub>

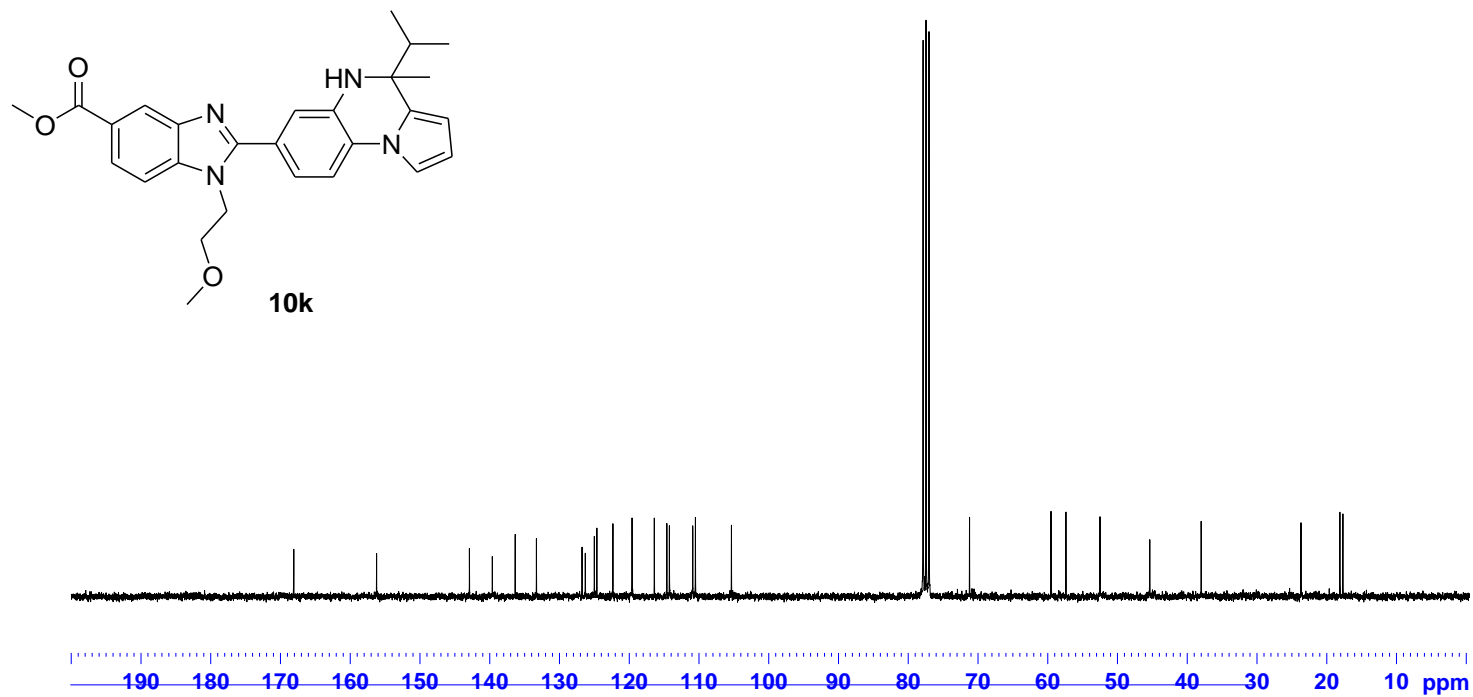

$^{13}\text{C}$  NMR spectrum (75 MHz) of compound 10k in  $\text{CDCl}_3$



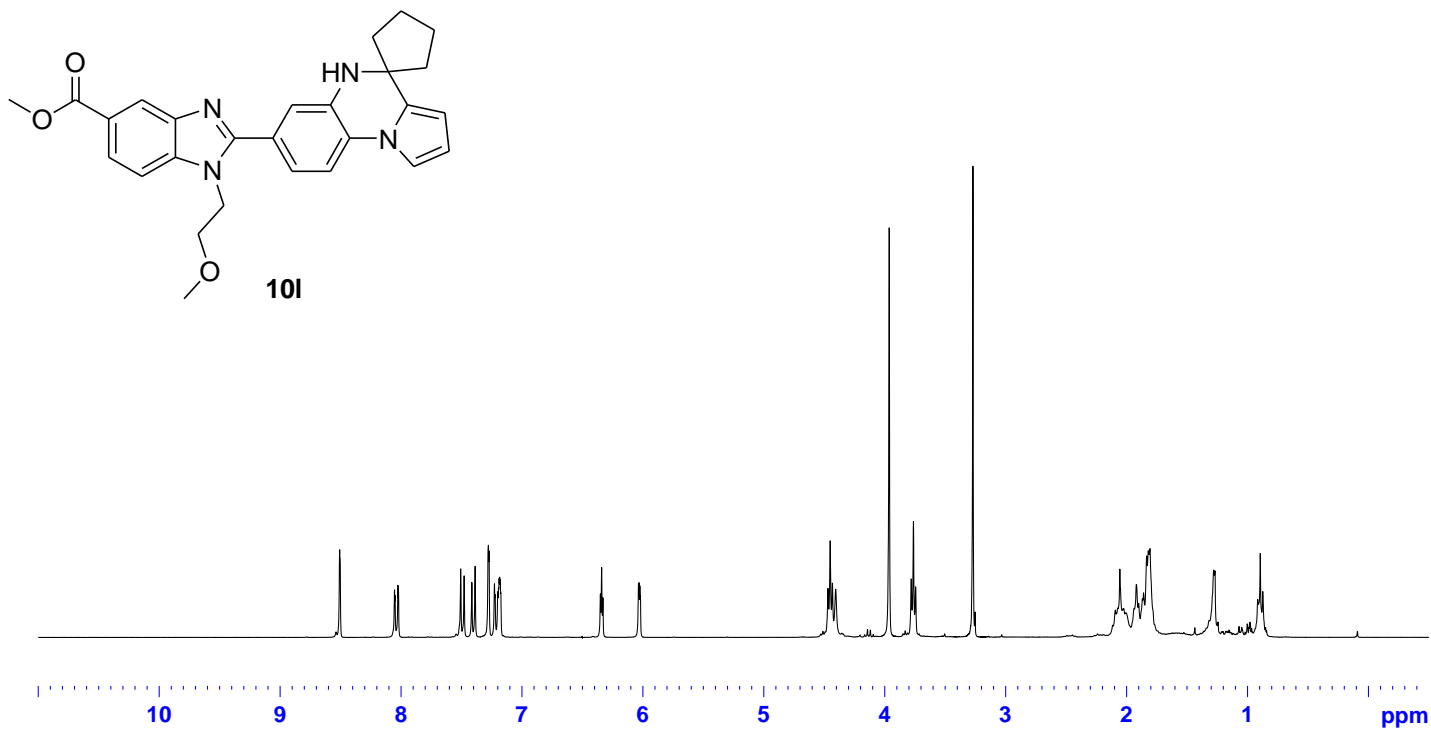

**<sup>1</sup>H NMR spectrum (300 MHz) of compound 10l in CDCl<sub>3</sub>**

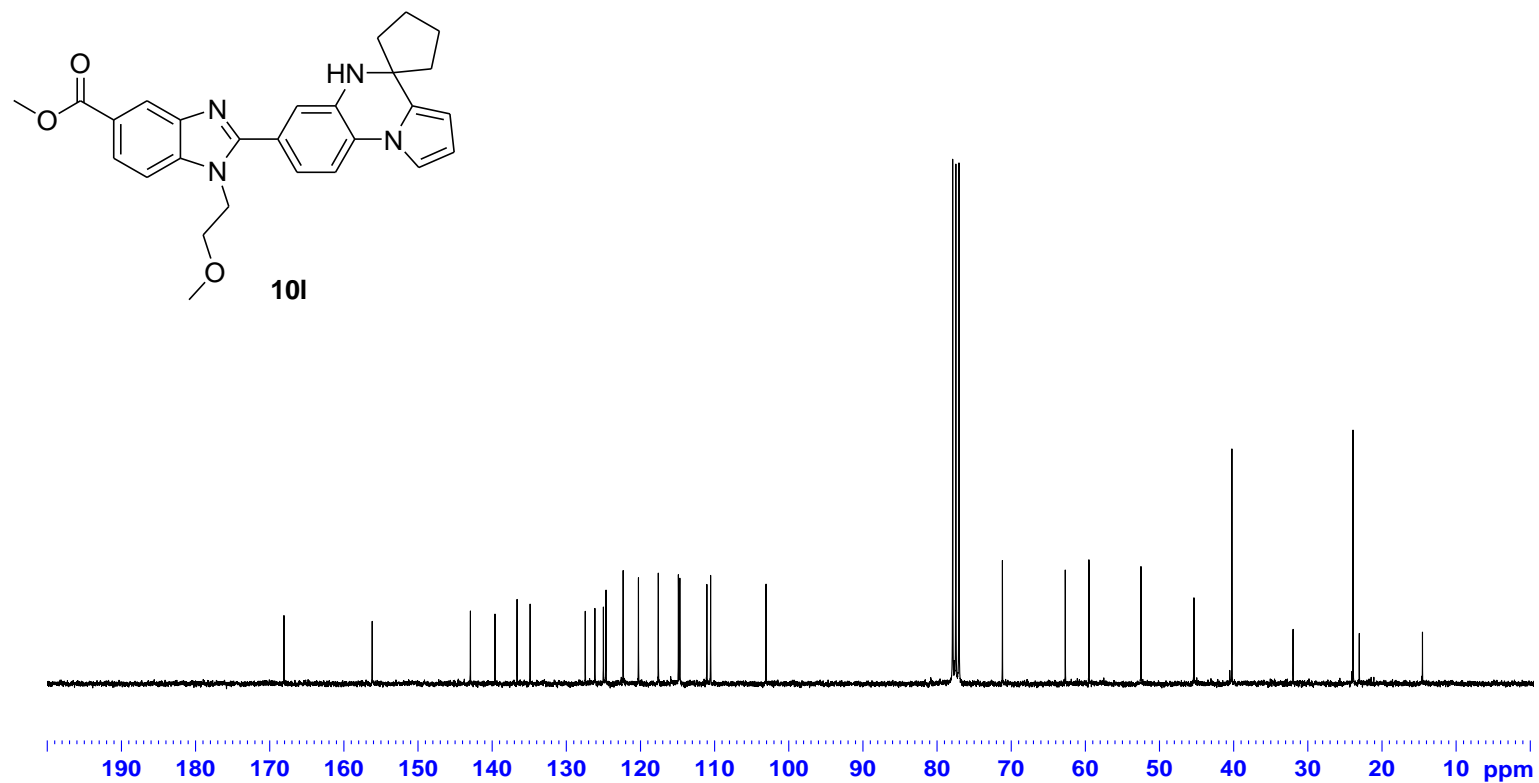

$^{13}\text{C}$  NMR spectrum (75 MHz) of compound 10l in  $\text{CDCl}_3$

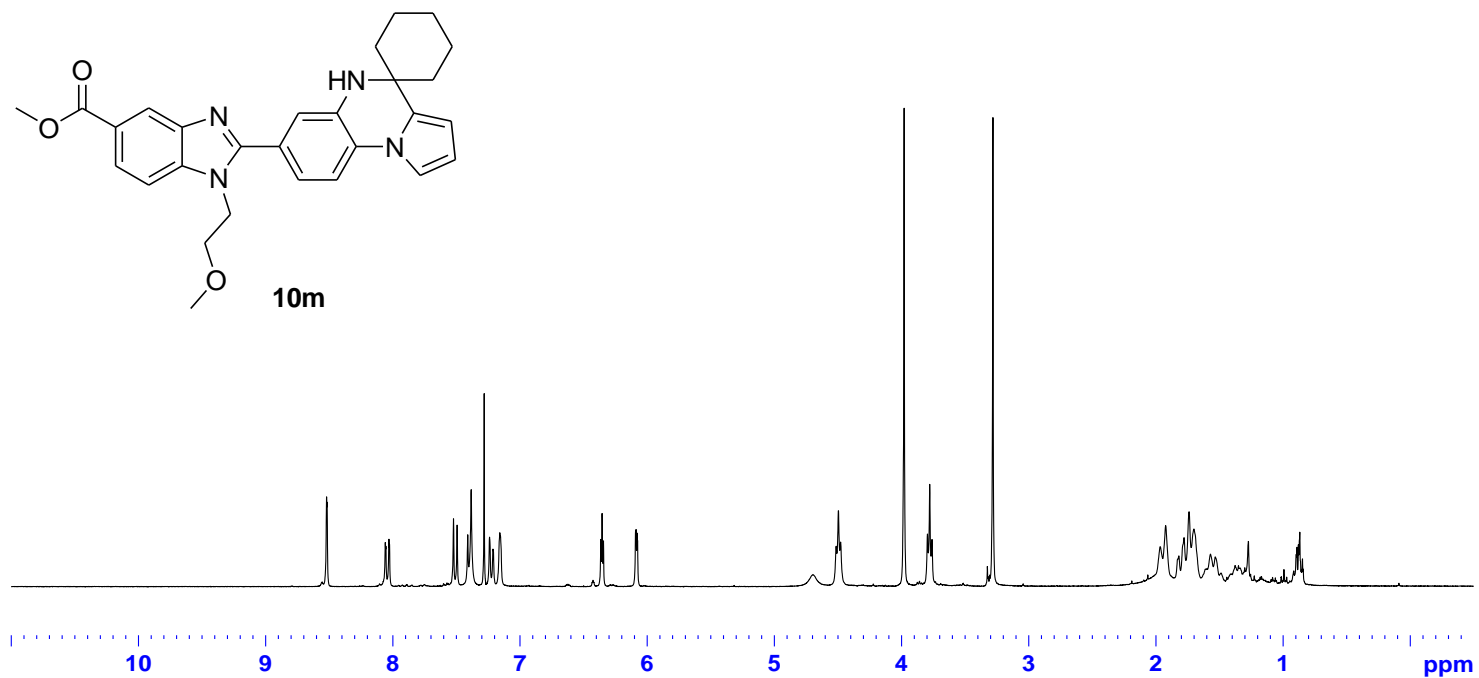

**<sup>1</sup>H NMR spectrum (300 MHz) of compound 10m in CDCl<sub>3</sub>**

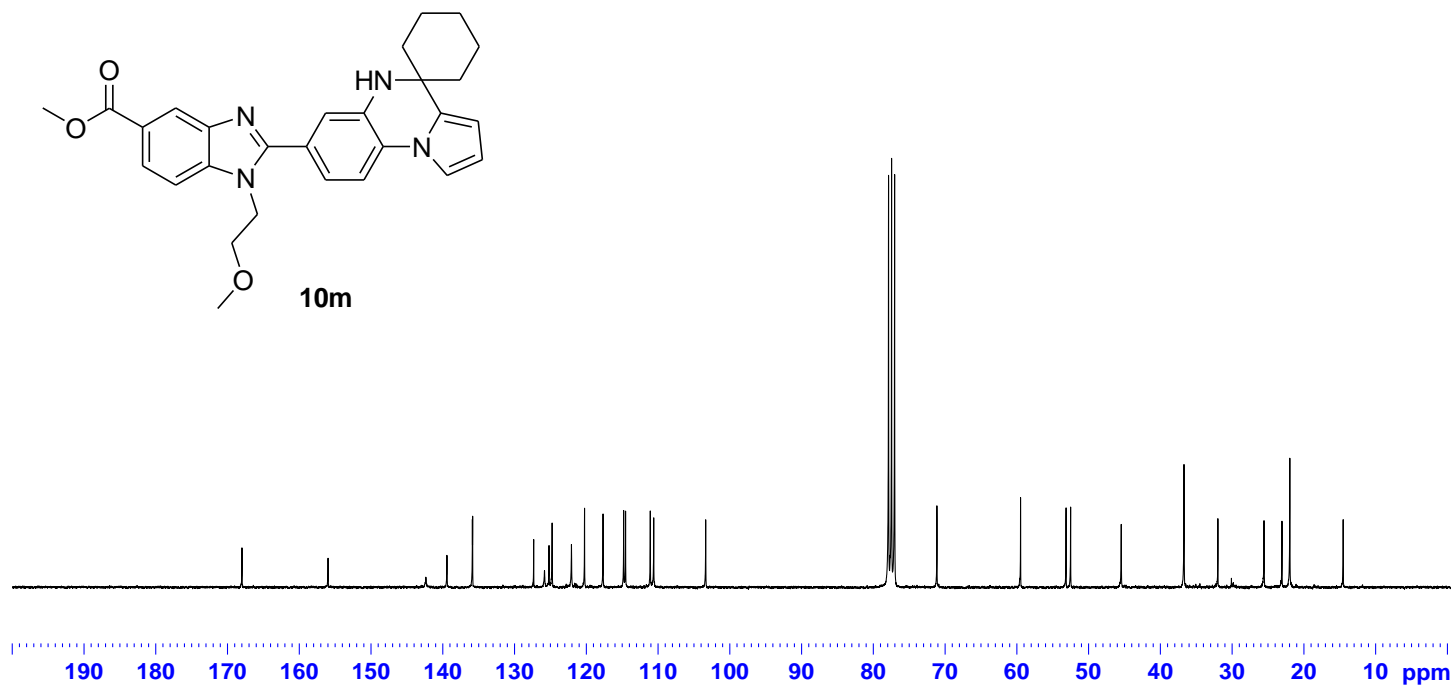

**<sup>13</sup>C NMR spectrum (75 MHz) of compound 10m in CDCl<sub>3</sub>**

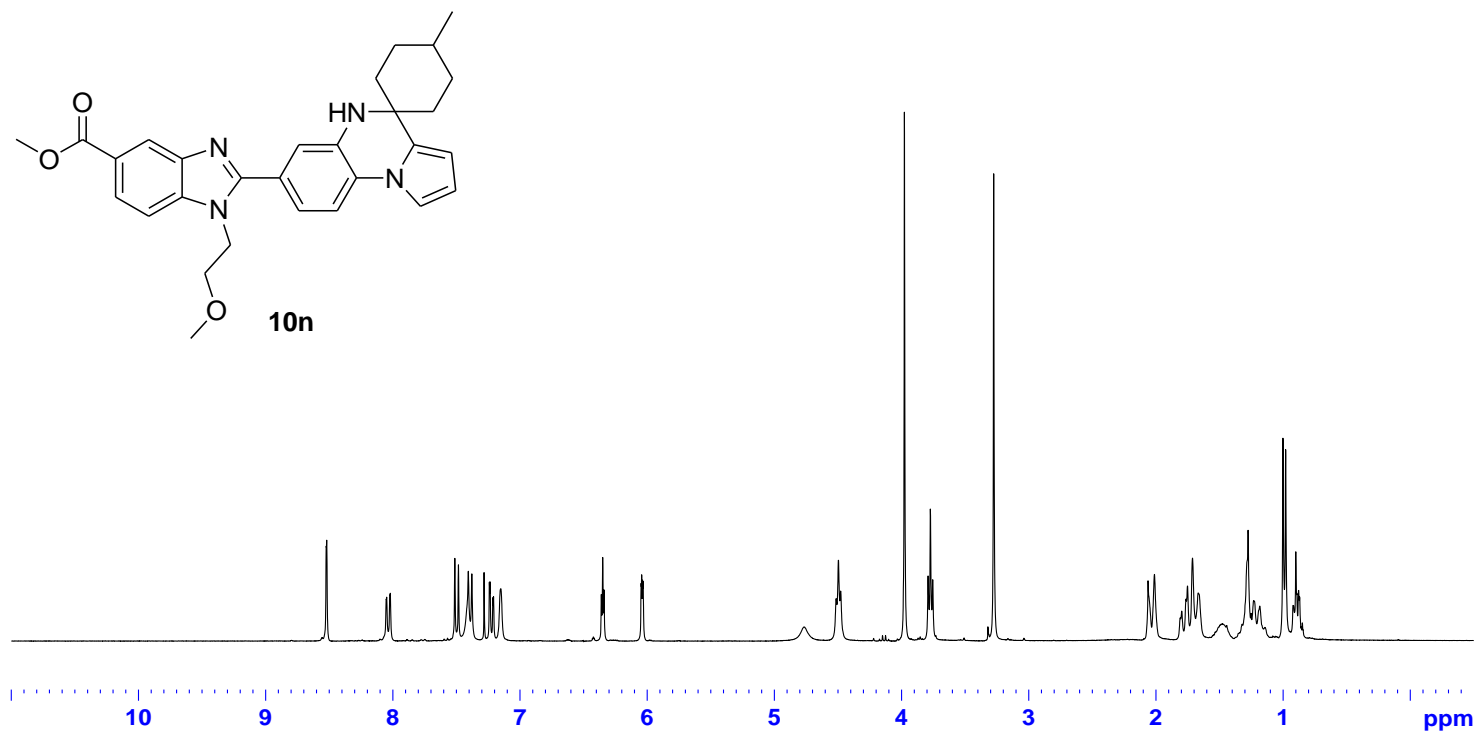

<sup>1</sup>H NMR spectrum (300 MHz) of compound 10n in CDCl<sub>3</sub>

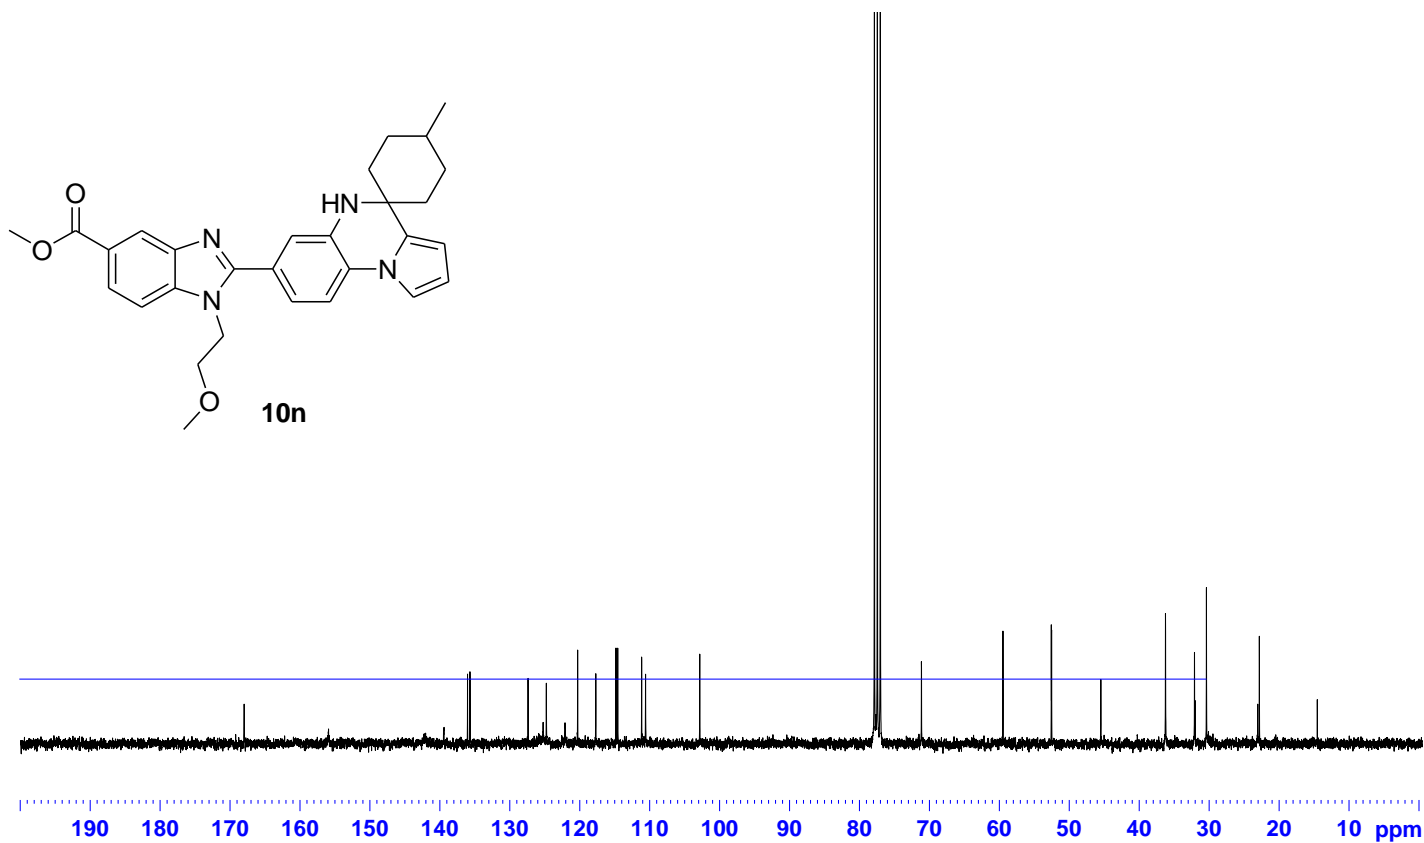

$^{13}\text{C}$  NMR spectrum (75 MHz) of compound 10n in  $\text{CDCl}_3$

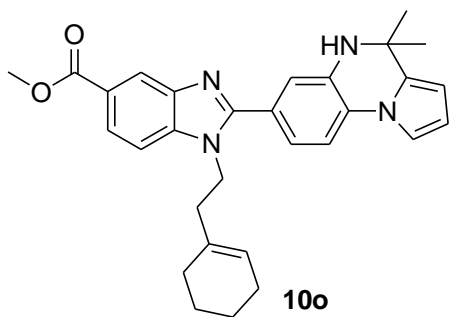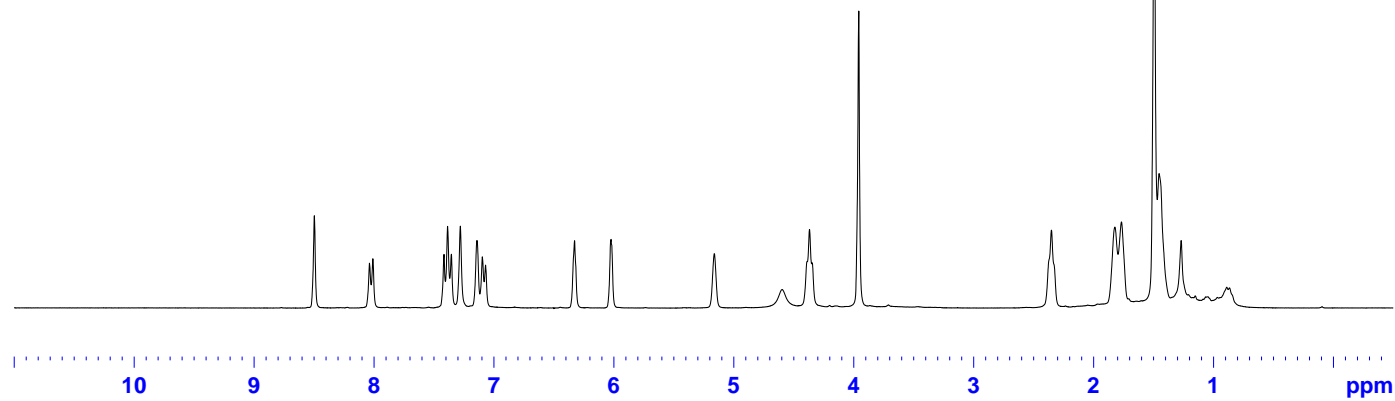

**<sup>1</sup>H NMR spectrum (300 MHz) of compound 10o in CDCl<sub>3</sub>**

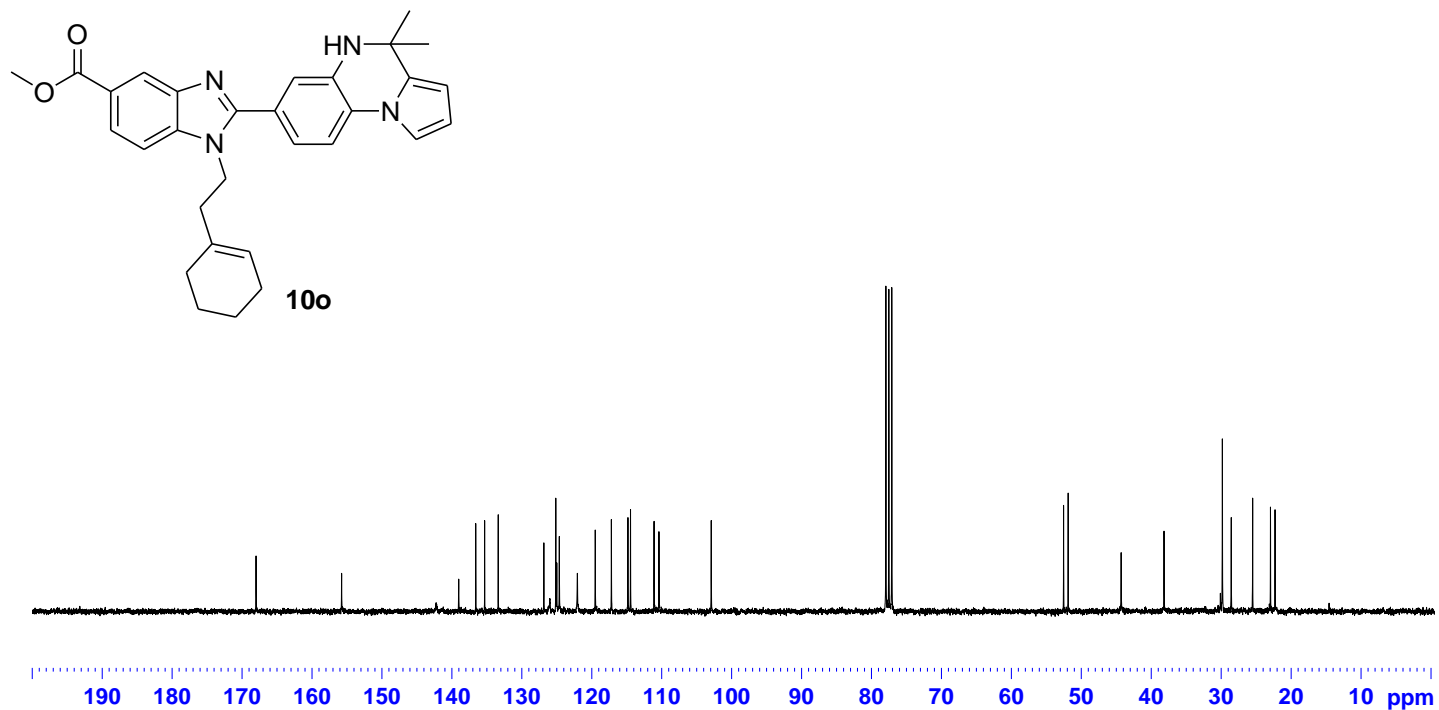

**<sup>13</sup>C NMR spectrum (75 MHz) of compound 10o in CDCl<sub>3</sub>**



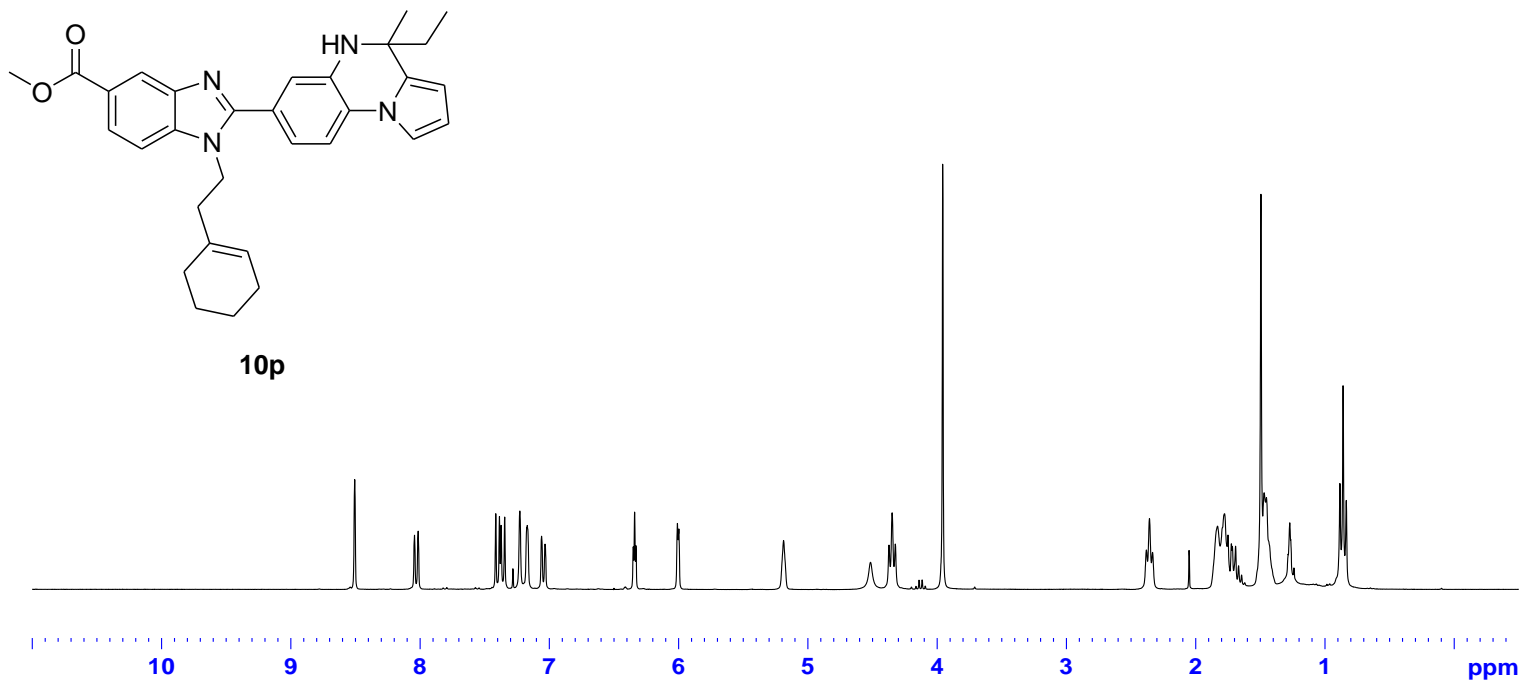

**<sup>1</sup>H NMR spectrum (300 MHz) of compound 10p in CDCl<sub>3</sub>**

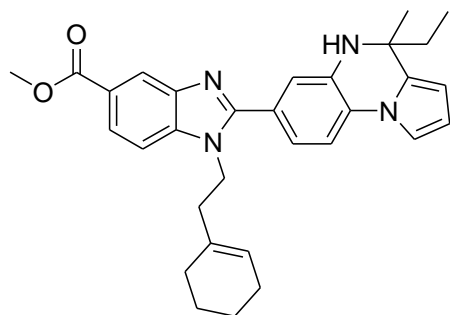

**10p**

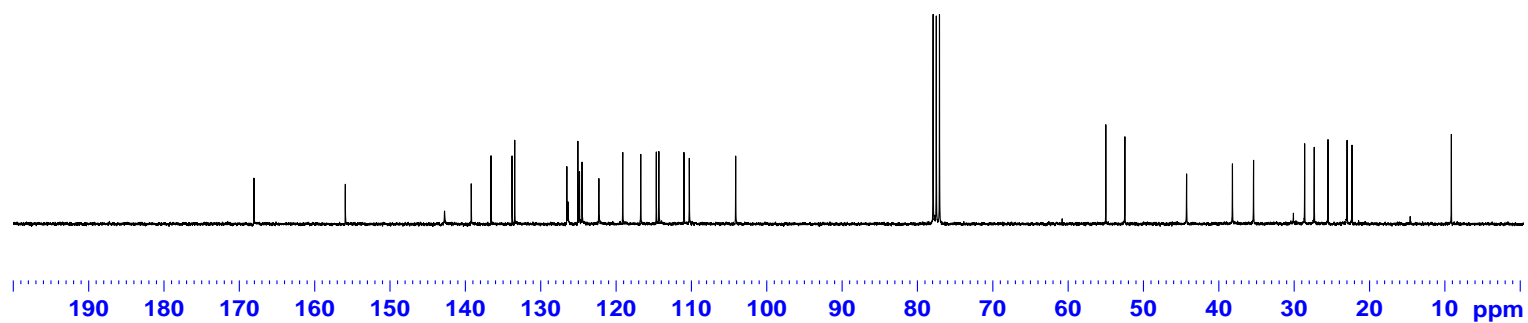

**<sup>13</sup>C NMR spectrum (75 MHz) of compound 10p in CDCl<sub>3</sub>**

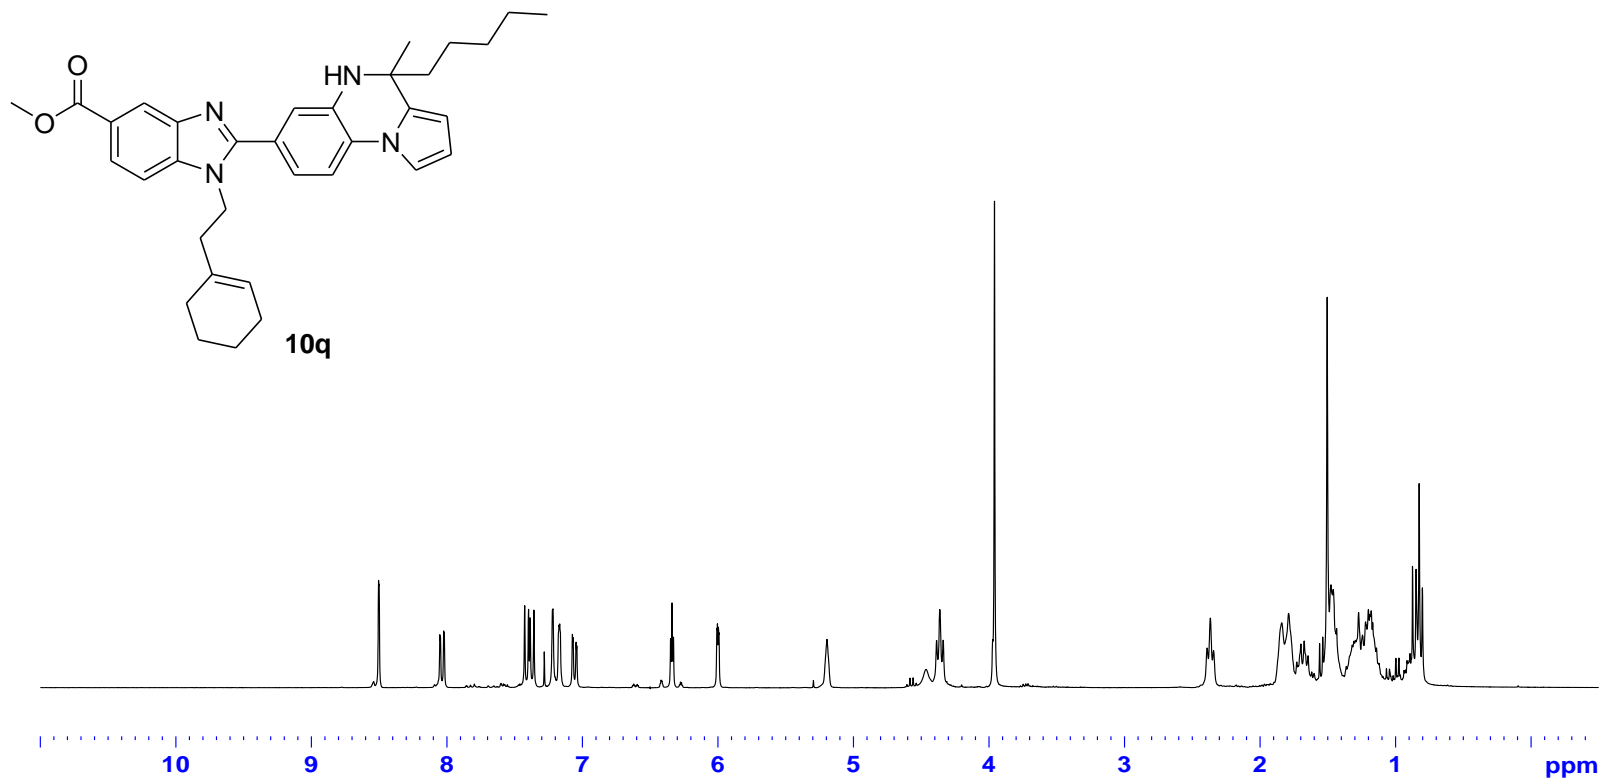

**<sup>1</sup>H NMR spectrum (300 MHz) of compound 10q in CDCl<sub>3</sub>**

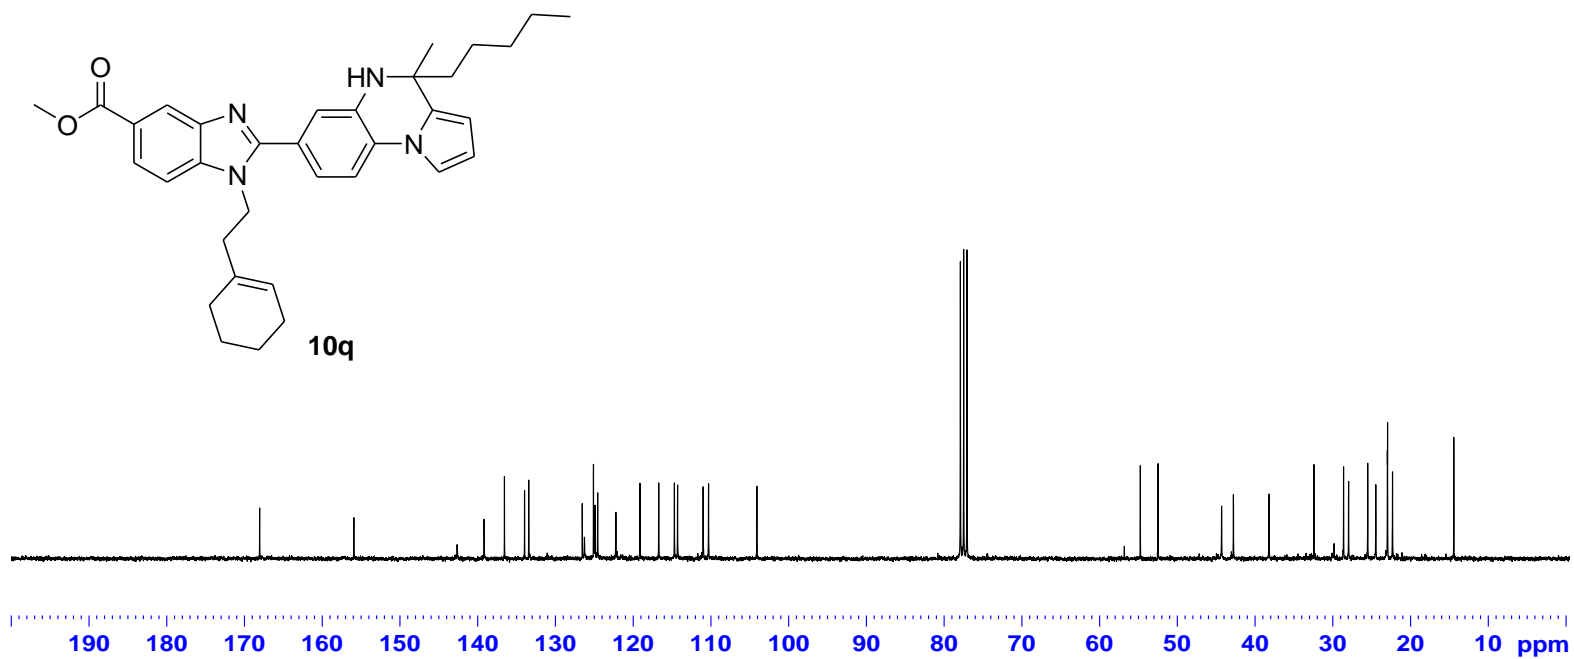

<sup>13</sup>C NMR spectrum (75 MHz) of compound 10q in CDCl<sub>3</sub>

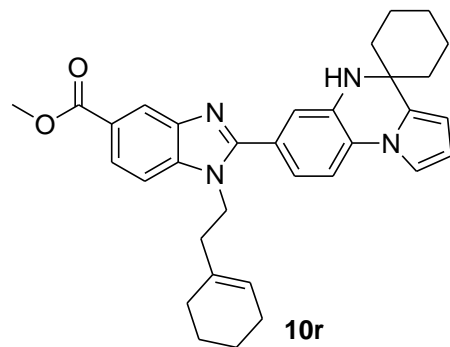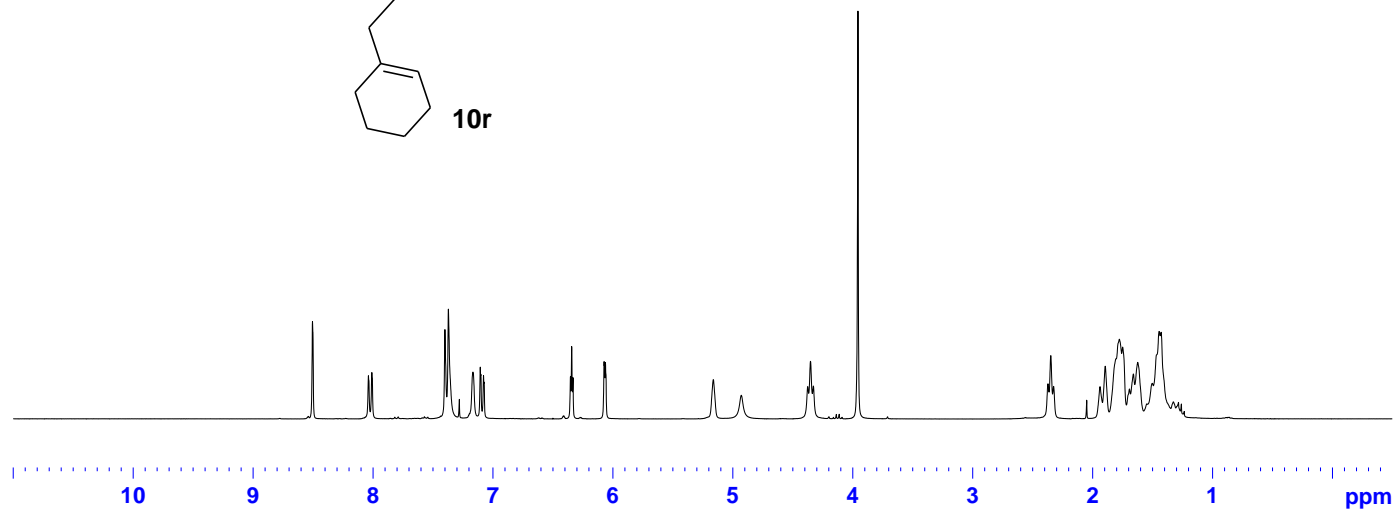

**<sup>1</sup>H NMR spectrum (300 MHz) of compound 10r in CDCl<sub>3</sub>**

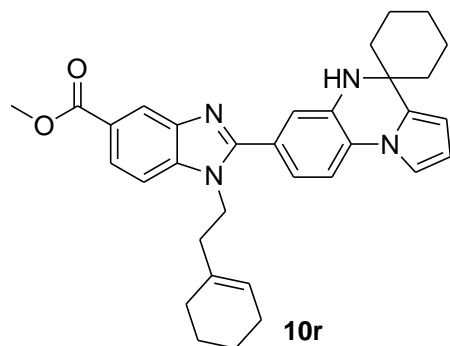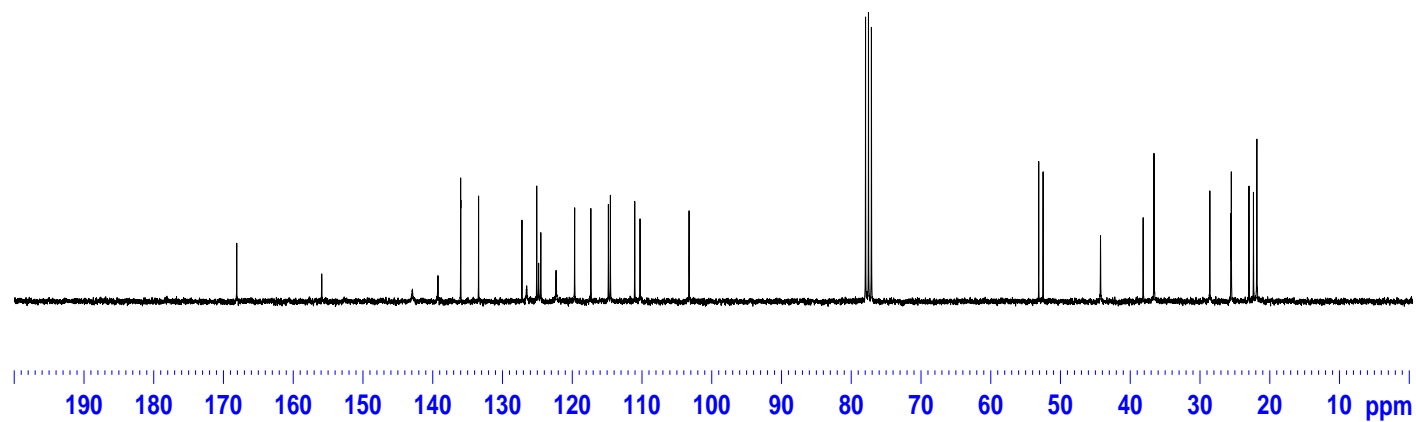

$^{13}\text{C}$  NMR spectrum (75 MHz) of compound 10r in  $\text{CDCl}_3$

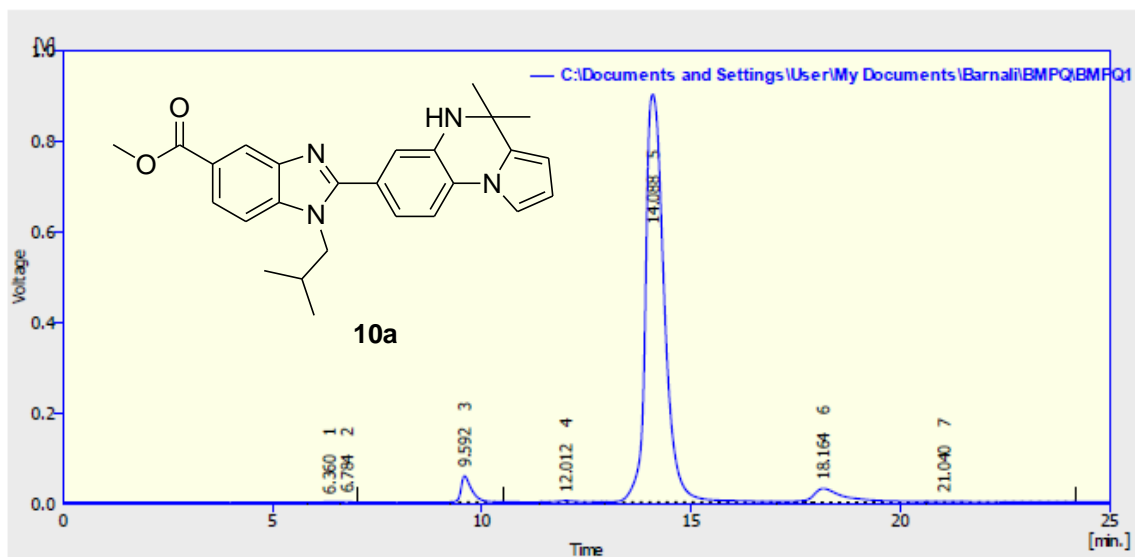

Result Table (Uncal - C:\Documents and Settings\User\My Documents\Barnali\BMPQ\BMPQ1)

|   | Reten. Time [min.] | Area [mV.e] | Height [mV] | Area [%] | Height [%] | W05 [min.] |
|---|--------------------|-------------|-------------|----------|------------|------------|
| 1 | 6.360              | 14.039      | 0.715       | 0.0      | 0.1        | 0.34       |
| 2 | 6.784              | 12.286      | 1.172       | 0.0      | 0.1        | 0.16       |
| 3 | 9.592              | 1012.364    | 57.906      | 3.3      | 5.0        | 0.26       |
| 4 | 12.012             | 108.604     | 3.228       | 0.3      | 0.3        | 0.42       |
| 5 | 14.088             | 28214.612   | 901.293     | 90.7     | 90.5       | 0.46       |
| 6 | 18.164             | 1620.693    | 29.851      | 5.2      | 3.0        | 0.66       |
| 7 | 21.040             | 108.541     | 1.504       | 0.3      | 0.2        | 1.06       |
|   | Total              | 31091.219   | 995.669     | 100.0    | 100.0      |            |

### Crude HPLC Spectra of Compounds 10a

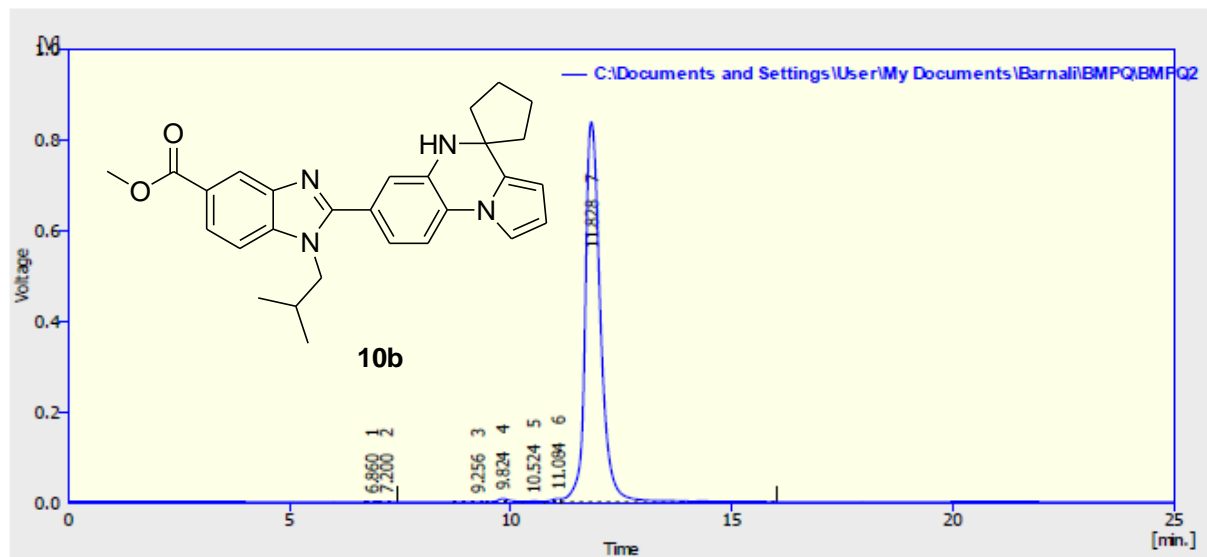

Result Table (Uncal - C:\Documents and Settings\User\My Documents\Barnali\BMPQ\BMPQ2)

|   | Reten. Time [min] | Area [mV.s] | Height [mV] | Area [%] | Height [%] | W05 [min] |
|---|-------------------|-------------|-------------|----------|------------|-----------|
| 1 | 6.860             | 2.202       | 0.232       | 0.0      | 0.0        | 0.15      |
| 2 | 7.200             | 2.942       | 0.270       | 0.0      | 0.0        | 0.16      |
| 3 | 9.256             | 4.230       | 0.222       | 0.0      | 0.0        | 0.20      |
| 4 | 9.824             | 118.044     | 6.802       | 0.6      | 0.8        | 0.26      |
| 5 | 10.524            | 27.639      | 1.323       | 0.1      | 0.2        | 0.39      |
| 6 | 11.084            | 101.455     | 7.106       | 0.5      | 0.8        | 0.23      |
| 7 | 11.828            | 20176.711   | 838.575     | 98.7     | 98.1       | 0.34      |
|   | Total             | 20433.223   | 854.529     | 100.0    | 100.0      |           |

### Crude HPLC Spectra of Compounds 10b



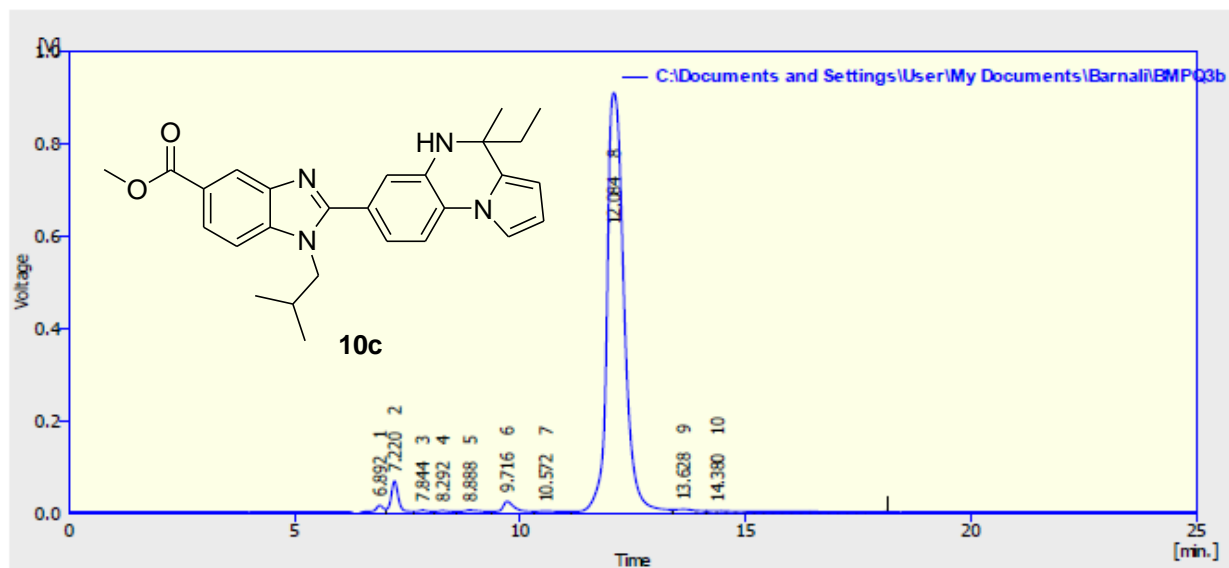

Result Table (Uncal - C:\Documents and Settings\User\My Documents\Barnali\BMPQ3b)

|   | Reten. Time<br>[min] | Area<br>[mV.s] | Height<br>[mV] | Area<br>[%] | Height<br>[%] | W05<br>[min] |
|---|----------------------|----------------|----------------|-------------|---------------|--------------|
| 1 | 6.892                | 337.924        | 19.551         | 1.2         | 1.8           | 0.24         |
| 2 | 7.220                | 915.612        | 71.819         | 3.3         | 6.7           | 0.17         |
| 3 | 7.844                | 174.690        | 8.327          | 0.6         | 0.8           | 0.44         |
| 4 | 8.292                | 169.756        | 7.077          | 0.6         | 0.7           | 0.49         |
| 5 | 8.888                | 280.636        | 8.162          | 1.0         | 0.8           | 0.79         |
| 6 | 9.716                | 604.420        | 26.551         | 2.2         | 2.5           | 0.28         |
| 7 | 10.572               | 209.948        | 5.300          | 0.8         | 0.5           | 0.80         |
| 8 | 12.084               | 24144.714      | 911.319        | 87.9        | 85.2          | 0.38         |

### Crude HPLC Spectra of Compounds 10c

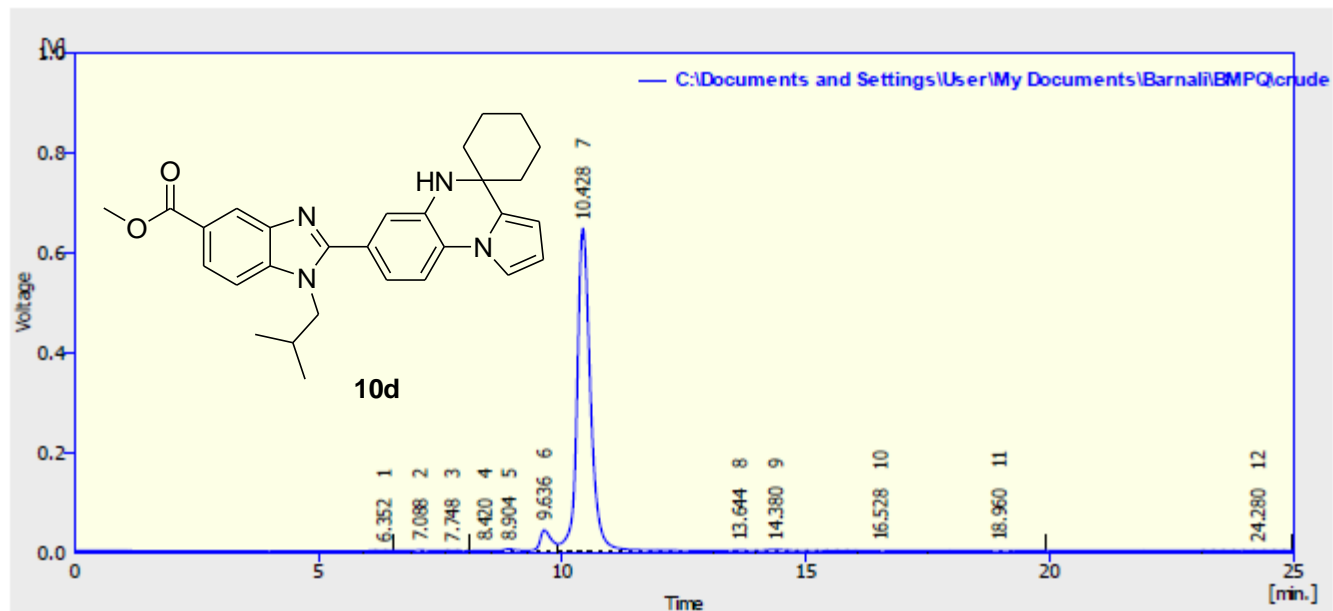

Result Table (Uncal - C:\Documents and Settings\User\My Documents\Barnali\BMPQ\crude)

|   | Reten. Time [min] | Area [mV.e] | Height [mV] | Area [%] | Height [%] | W05 [min] |
|---|-------------------|-------------|-------------|----------|------------|-----------|
| 1 | 6.352             | 9.195       | 0.426       | 0.1      | 0.1        | 0.36      |
| 2 | 7.088             | 23.992      | 1.476       | 0.2      | 0.2        | 0.22      |
| 3 | 7.748             | 4.677       | 0.430       | 0.0      | 0.1        | 0.17      |
| 4 | 8.420             | 10.067      | 0.714       | 0.1      | 0.1        | 0.24      |
| 5 | 8.904             | 70.781      | 3.705       | 0.5      | 0.5        | 0.28      |
| 6 | 9.636             | 681.882     | 41.721      | 5.1      | 6.0        | 0.26      |
| 7 | 10.428            | 12429.524   | 646.151     | 92.1     | 92.2       | 0.28      |
| 8 | 13.644            | 44.309      | 1.506       | 0.3      | 0.2        | 0.47      |

### Crude HPLC Spectra of Compounds 10d

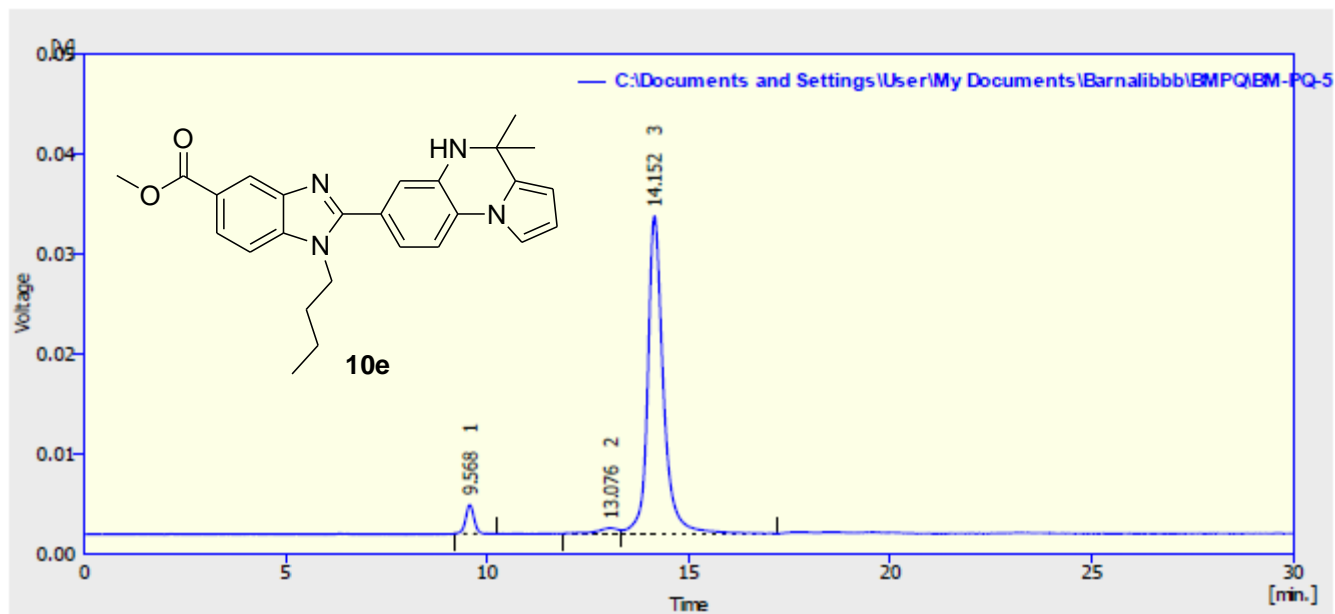

Result Table (Uncal - C:\Documents and Settings\User\My Documents\Barnalibbb\BMPQ\BM-PQ-5)

|   | Reten. Time [min] | Area [mV.s] | Height [mV] | Area [%] | Height [%] | W05 [min] |
|---|-------------------|-------------|-------------|----------|------------|-----------|
| 1 | 9.568             | 42.762      | 2.906       | 4.6      | 8.2        | 0.22      |
| 2 | 13.076            | 21.693      | 0.582       | 2.3      | 1.6        | 0.57      |
| 3 | 14.152            | 863.858     | 31.818      | 93.1     | 90.1       | 0.38      |
|   | Total             | 928.312     | 35.306      | 100.0    | 100.0      |           |

### Crude HPLC Spectra of Compounds 10e

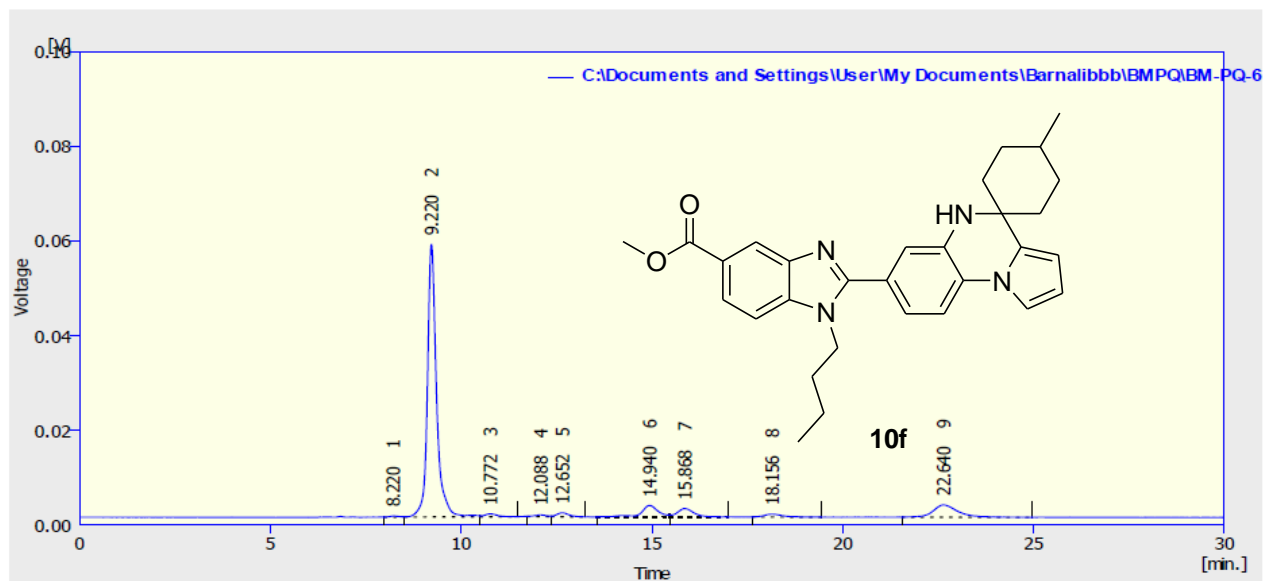

Result Table (Uncal - C:\Documents and Settings\User\My Documents\Barnalibbb\BMPQ\BM-PQ-6)

|   | Reten. Time [min] | Area [mV.s] | Height [mV] | Area [%] | Height [%] | W05 [min] |
|---|-------------------|-------------|-------------|----------|------------|-----------|
| 1 | 8.220             | 3.924       | 0.225       | 0.3      | 0.3        | 0.29      |
| 2 | 9.220             | 955.024     | 57.614      | 74.9     | 85.8       | 0.23      |
| 3 | 10.772            | 14.575      | 0.640       | 1.1      | 1.0        | 0.33      |
| 4 | 12.088            | 7.819       | 0.375       | 0.6      | 0.6        | 0.33      |
| 5 | 12.652            | 18.904      | 0.846       | 1.5      | 1.3        | 0.34      |
| 6 | 14.940            | 78.358      | 2.454       | 6.1      | 3.7        | 0.41      |
| 7 | 15.868            | 54.661      | 1.802       | 4.3      | 2.7        | 0.44      |
| 8 | 18.156            | 21.663      | 0.620       | 1.7      | 0.9        | 0.50      |

### Crude HPLC Spectra of Compounds 10f

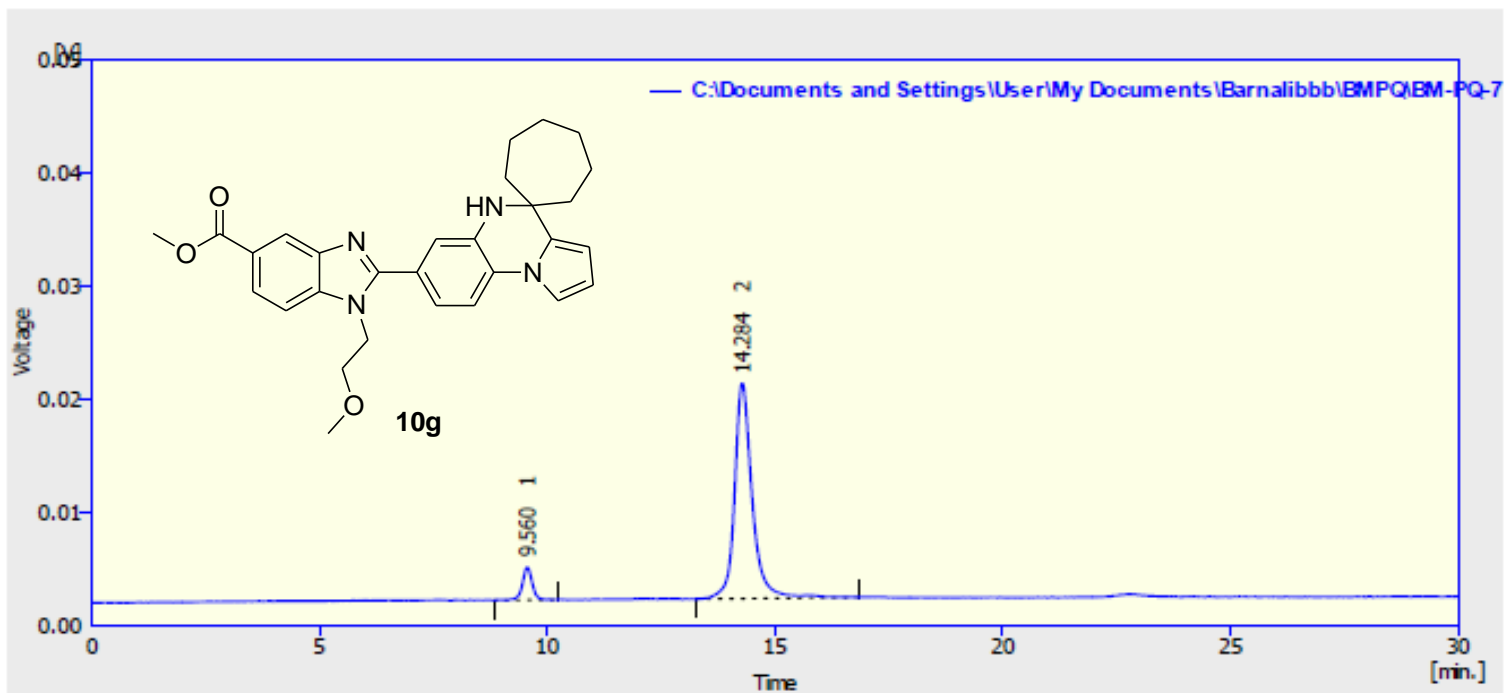

Result Table (Uncal - C:\Documents and Settings\User\My Documents\Barnalibbb\BMPQ\BM-PQ-7)

|   | Reten. Time [min] | Area [mV.s] | Height [mV] | Area [%] | Height [%] | W05 [min] |
|---|-------------------|-------------|-------------|----------|------------|-----------|
| 1 | 9.560             | 44.229      | 2.090       | 7.9      | 13.2       | 0.22      |
| 2 | 14.284            | 517.539     | 19.052      | 92.1     | 86.8       | 0.38      |
|   | Total             | 561.768     | 21.950      | 100.0    | 100.0      |           |

### Crude HPLC Spectra of Compounds 10g

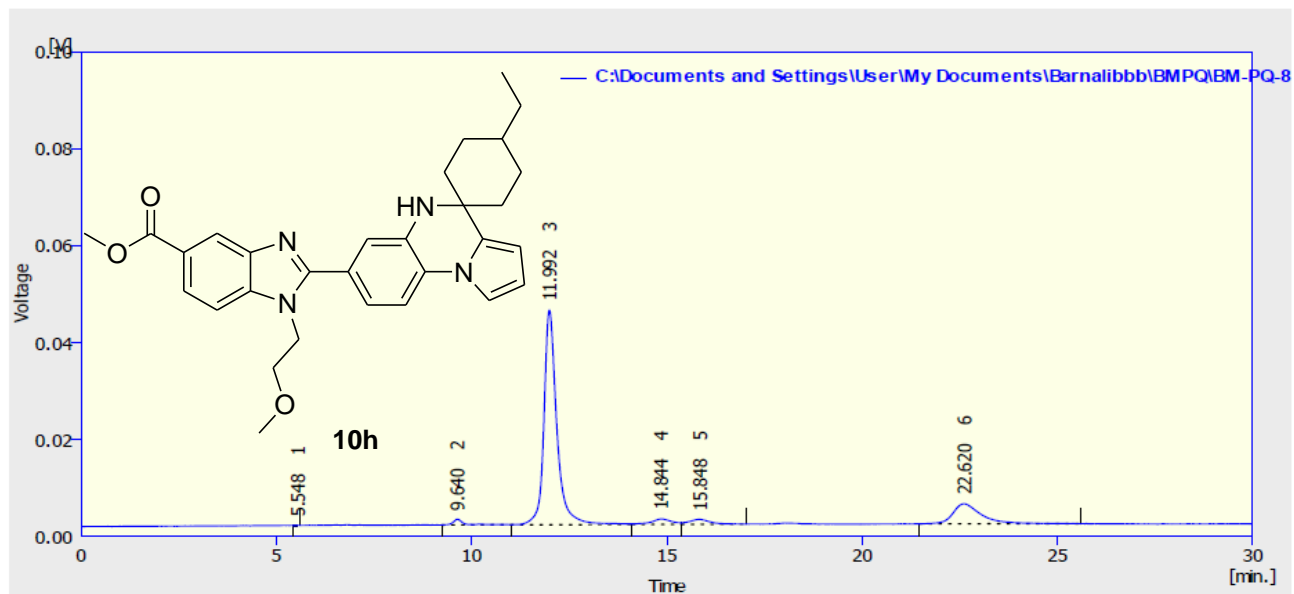

Result Table (Uncal - C:\Documents and Settings\User\My Documents\Barnalibbb\BMPQ\BM-PQ-8)

|   | Reten. Time [min] | Area [mV.s] | Height [mV] | Area [%] | Height [%] | W05 [min] |
|---|-------------------|-------------|-------------|----------|------------|-----------|
| 1 | 5.548             | 0.282       | 0.048       | 0.0      | 0.1        | 0.05      |
| 2 | 9.640             | 22.762      | 1.182       | 1.7      | 2.3        | 0.22      |
| 3 | 11.992            | 1021.803    | 44.328      | 76.3     | 85.5       | 0.32      |
| 4 | 14.844            | 41.233      | 1.126       | 3.1      | 2.2        | 0.52      |
| 5 | 15.848            | 38.360      | 1.012       | 2.9      | 2.0        | 0.57      |
| 6 | 22.620            | 214.426     | 4.128       | 16.0     | 8.0        | 0.72      |
|   | Total             | 1338.866    | 51.824      | 100.0    | 100.0      |           |

### Crude HPLC Spectra of Compounds 10h

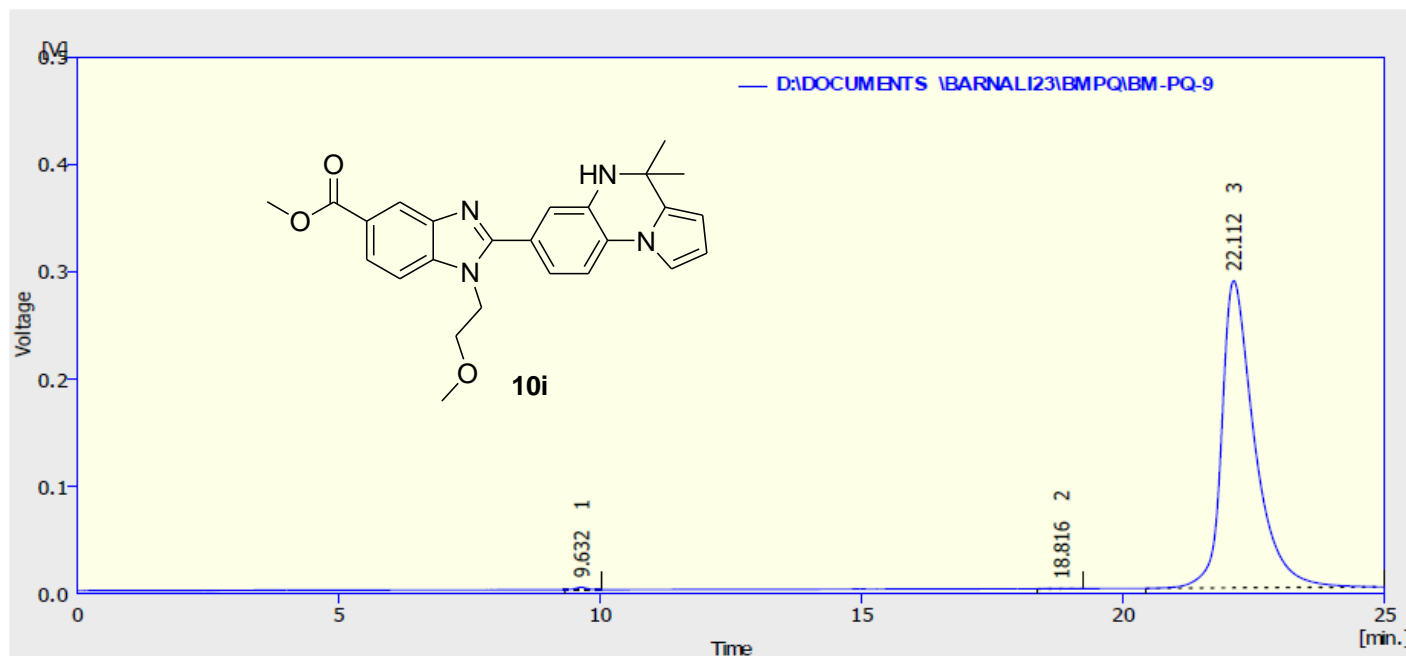

Result Table (Uncal - D:\DOCUMENTS \BARNALI23\BMPQ\BM-PQ-9)

|       | Reten. Time [min] | Area [mV.s] | Height [mV] | Area [%] | Height [%] | W05 [min] |
|-------|-------------------|-------------|-------------|----------|------------|-----------|
| 1     | 9.632             | 32.720      | 2.288       | 0.3      | 0.8        | 0.22      |
| 2     | 18.816            | 3.115       | 0.108       | 0.0      | 0.0        | 0.53      |
| 3     | 22.112            | 12521.821   | 286.273     | 99.7     | 99.2       | 0.62      |
| Total |                   | 12557.656   | 288.669     | 100.0    | 100.0      |           |

### Crude HPLC Spectra of Compounds 10i

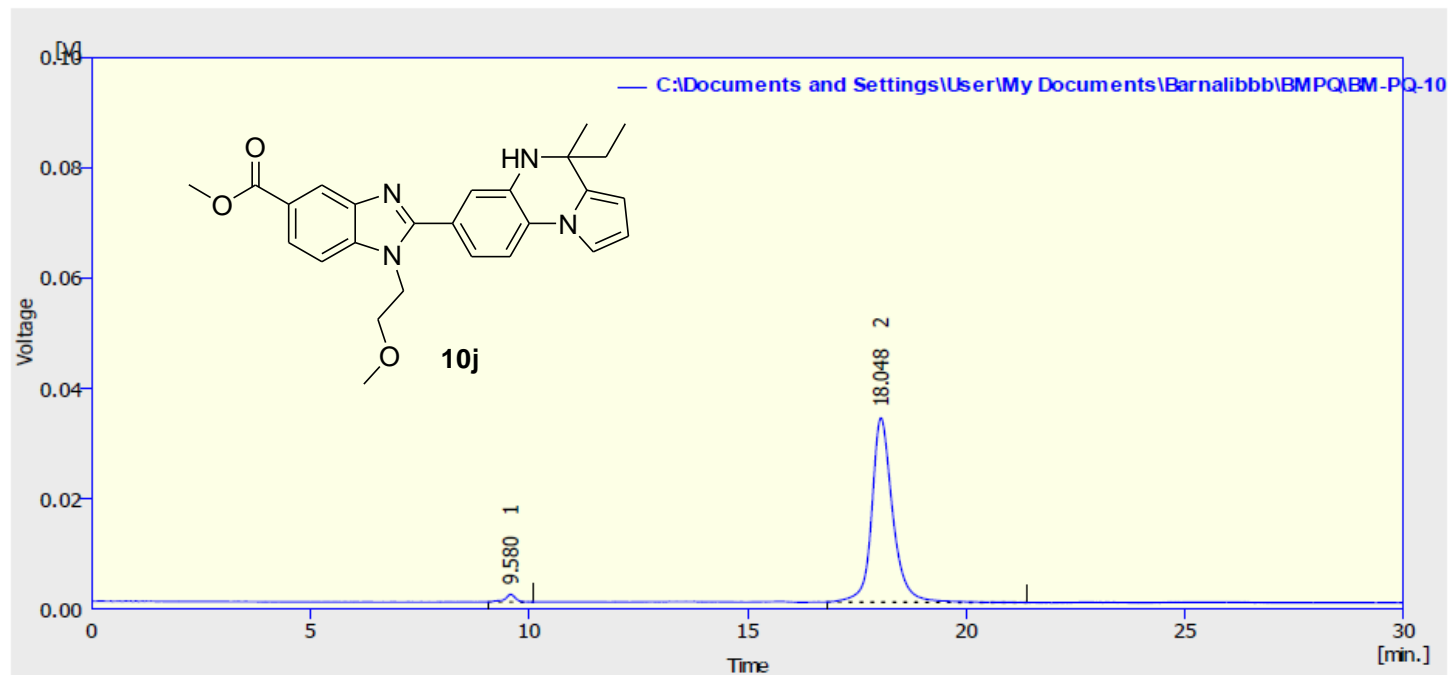

Result Table (Uncal - C:\Documents and Settings\User\My Documents\Barnalibbb\BMPQ\BM-PQ-10)

|   | Reten. Time [min] | Area [mV.s] | Height [mV] | Area [%] | Height [%] | W05 [min] |
|---|-------------------|-------------|-------------|----------|------------|-----------|
| 1 | 9.580             | 23.152      | 1.362       | 2.0      | 3.9        | 0.22      |
| 2 | 18.048            | 1118.414    | 33.413      | 98.0     | 96.1       | 0.47      |
|   | Total             | 1141.567    | 34.775      | 100.0    | 100.0      |           |

### Crude HPLC Spectra of Compounds 10j



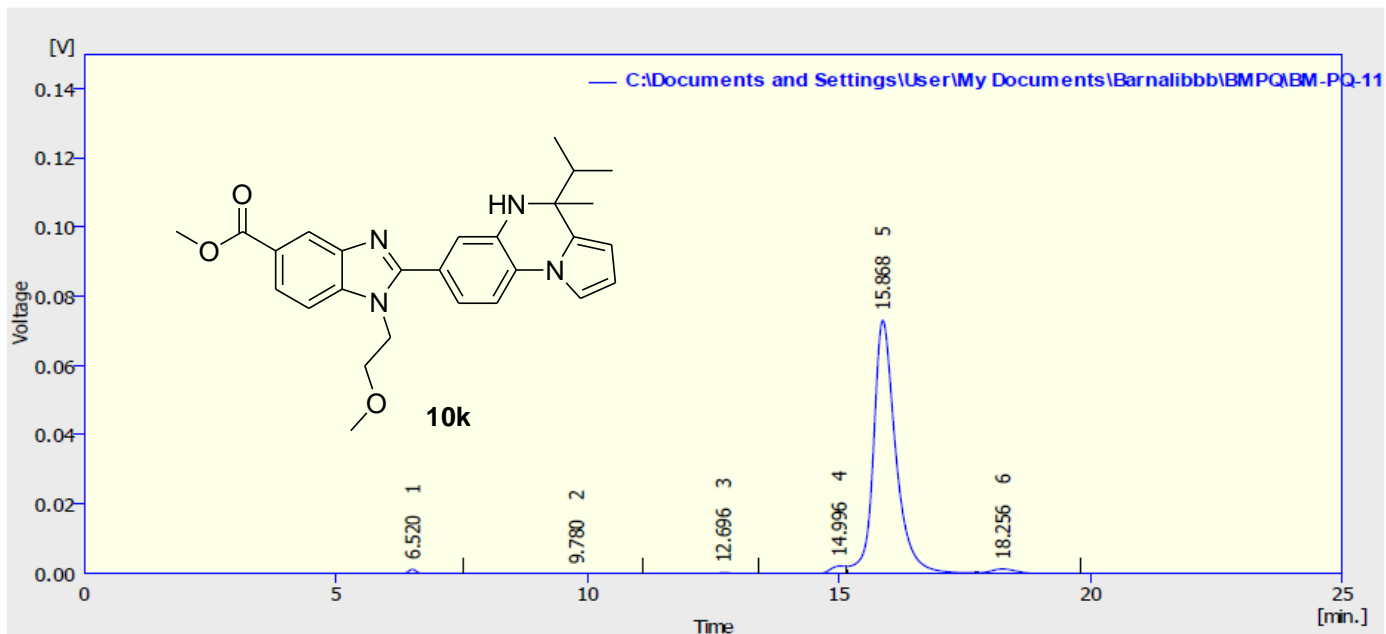

Result Table (Uncal - C:\Documents and Settings\User\My Documents\Barnalibbb\BMPQ\BM-PQ-11)

|   | Reten. Time [min] | Area [mV.s] | Height [mV] | Area [%] | Height [%] | W05 [min] |
|---|-------------------|-------------|-------------|----------|------------|-----------|
| 1 | 6.520             | 29.174      | 1.594       | 1.2      | 2.0        | 0.21      |
| 2 | 9.780             | 8.158       | 0.278       | 0.3      | 0.3        | 0.23      |
| 3 | 12.696            | 15.695      | 0.661       | 0.6      | 0.8        | 0.36      |
| 4 | 14.996            | 55.430      | 2.527       | 2.2      | 3.2        | 0.35      |
| 5 | 15.868            | 2305.682    | 73.488      | 92.7     | 91.6       | 0.44      |
| 6 | 18.256            | 74.332      | 1.644       | 3.0      | 2.1        | 0.66      |
|   | Total             | 2488.472    | 80.193      | 100.0    | 100.0      |           |

### Crude HPLC Spectra of Compounds 10k

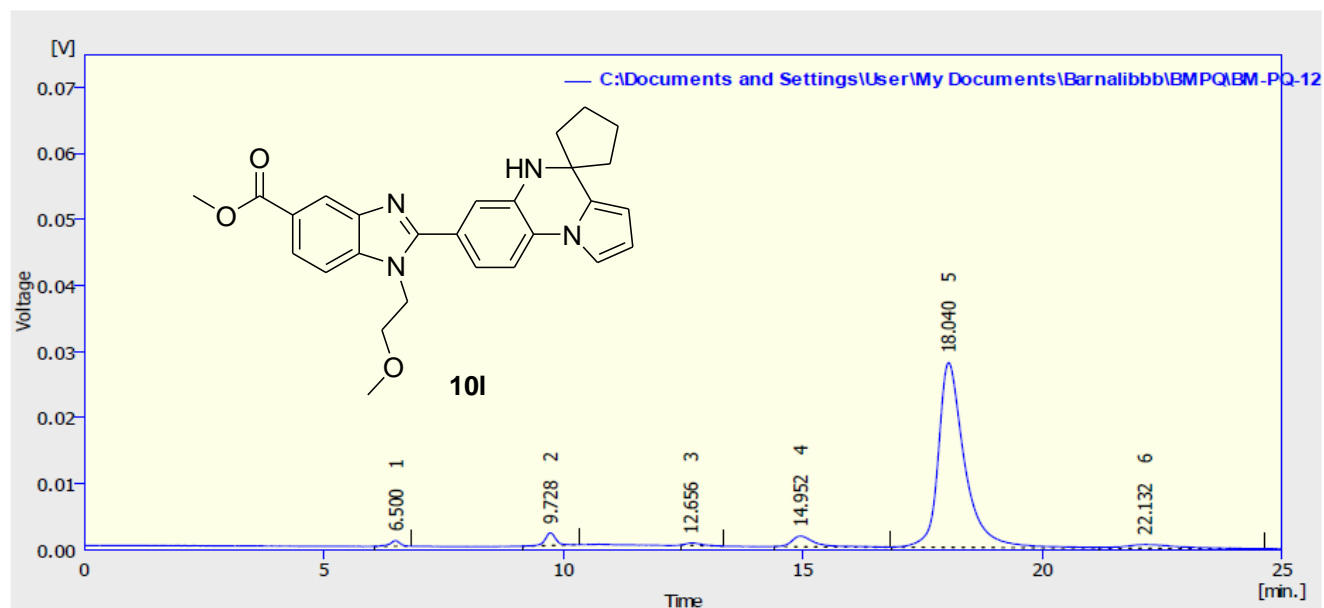

Result Table (Uncal - C:\Documents and Settings\User\My Documents\Barnalibbb\BMPQ\BM-PQ-12)

|   | Reten. Time [min] | Area [mV.s] | Height [mV] | Area [%] | Height [%] | W05 [min] |
|---|-------------------|-------------|-------------|----------|------------|-----------|
| 1 | 6.500             | 12.799      | 0.838       | 1.0      | 2.5        | 0.21      |
| 2 | 9.728             | 30.263      | 1.906       | 2.5      | 5.7        | 0.23      |
| 3 | 12.656            | 8.256       | 0.360       | 0.7      | 1.1        | 0.31      |
| 4 | 14.952            | 54.471      | 1.602       | 4.4      | 4.8        | 0.46      |
| 5 | 18.040            | 1076.216    | 27.969      | 87.7     | 84.1       | 0.53      |
| 6 | 22.132            | 45.651      | 0.570       | 3.7      | 1.7        | 1.04      |
|   | Total             | 1227.655    | 33.244      | 100.0    | 100.0      |           |

### Crude HPLC Spectra of Compounds 10l

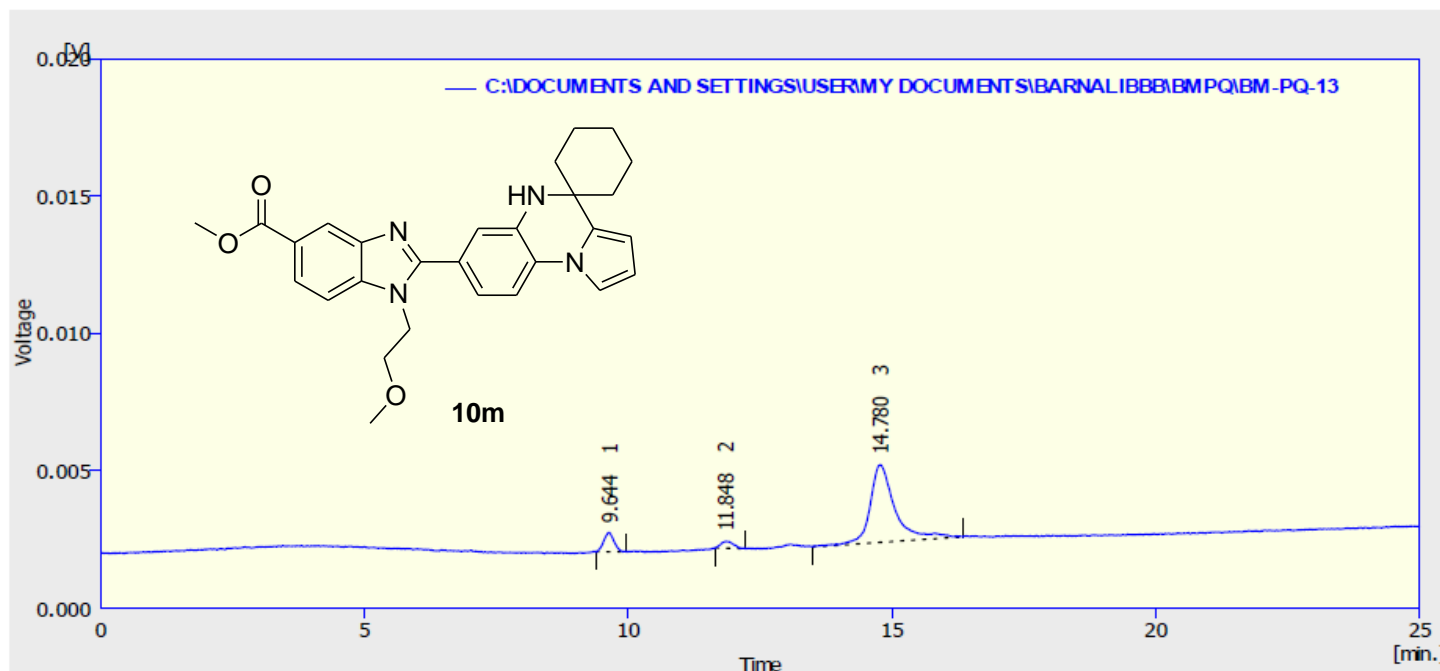

Result Table (Uncal - C:\DOCUMENTS AND SETTINGS\USER\MY DOCUMENTS\BARNALIBBB\BMPQ\BM-PQ-13)

|   | Reten. Time [min] | Area [mV.s] | Height [mV] | Area [%] | Height [%] | W05 [min] |
|---|-------------------|-------------|-------------|----------|------------|-----------|
| 1 | 9.644             | 9.624       | 0.706       | 9.0      | 18.7       | 0.22      |
| 2 | 11.848            | 4.163       | 0.240       | 3.9      | 6.4        | 0.26      |
| 3 | 14.780            | 93.377      | 2.826       | 87.1     | 74.9       | 0.43      |
|   | Total             | 107.163     | 3.772       | 100.0    | 100.0      |           |

### Crude HPLC Spectra of Compounds 10m

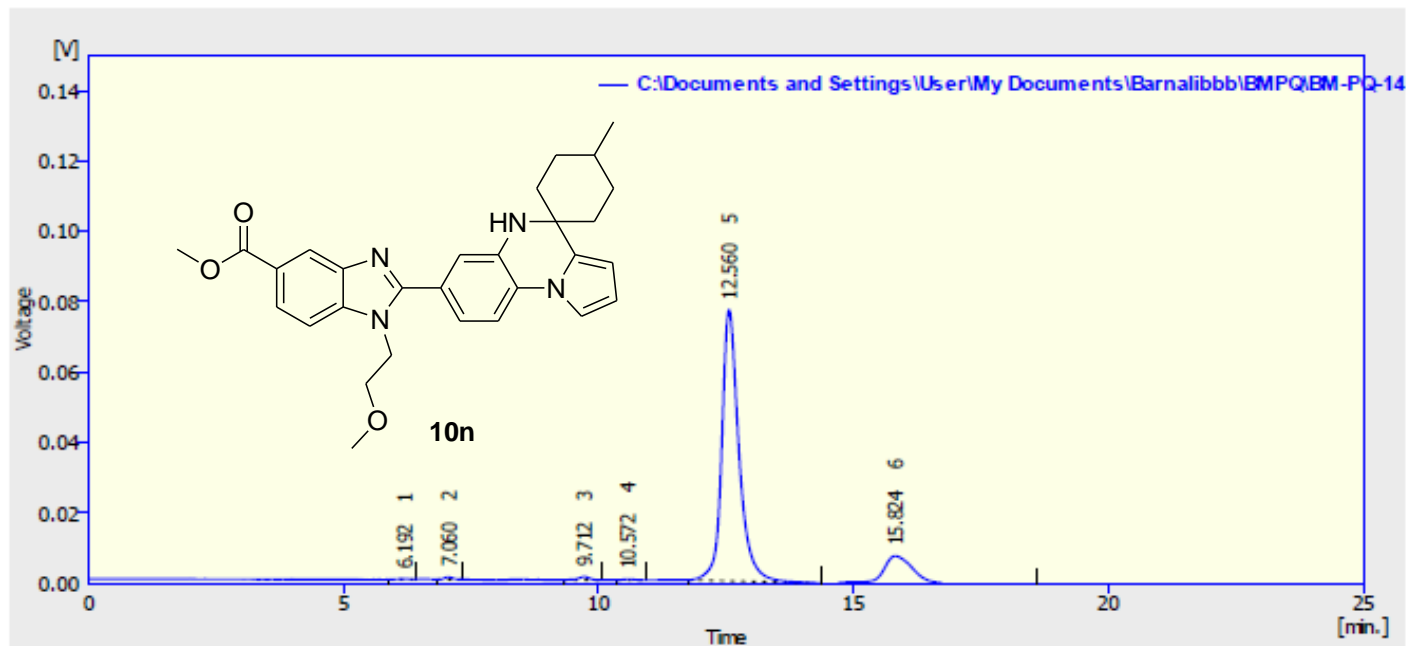

Result Table (Uncal - C:\Documents and Settings\User\My Documents\Barnalibbb\BMPQ\BM-PQ-14)

|   | Reten. Time [min] | Area [mV.s] | Height [mV] | Area [%] | Height [%] | W05 [min] |
|---|-------------------|-------------|-------------|----------|------------|-----------|
| 1 | 6.192             | 2.875       | 0.182       | 0.1      | 0.2        | 0.24      |
| 2 | 7.060             | 8.003       | 0.607       | 0.4      | 0.8        | 0.18      |
| 3 | 9.712             | 14.533      | 0.926       | 0.7      | 1.1        | 0.23      |
| 4 | 10.572            | 4.449       | 0.301       | 0.2      | 0.3        | 0.24      |
| 5 | 12.560            | 1810.996    | 77.123      | 83.2     | 88.5       | 0.33      |
| 6 | 15.824            | 335.780     | 7.914       | 15.4     | 9.1        | 0.60      |
|   | Total             | 2176.636    | 87.133      | 100.0    | 100.0      |           |

### Crude HPLC Spectra of Compounds 10n

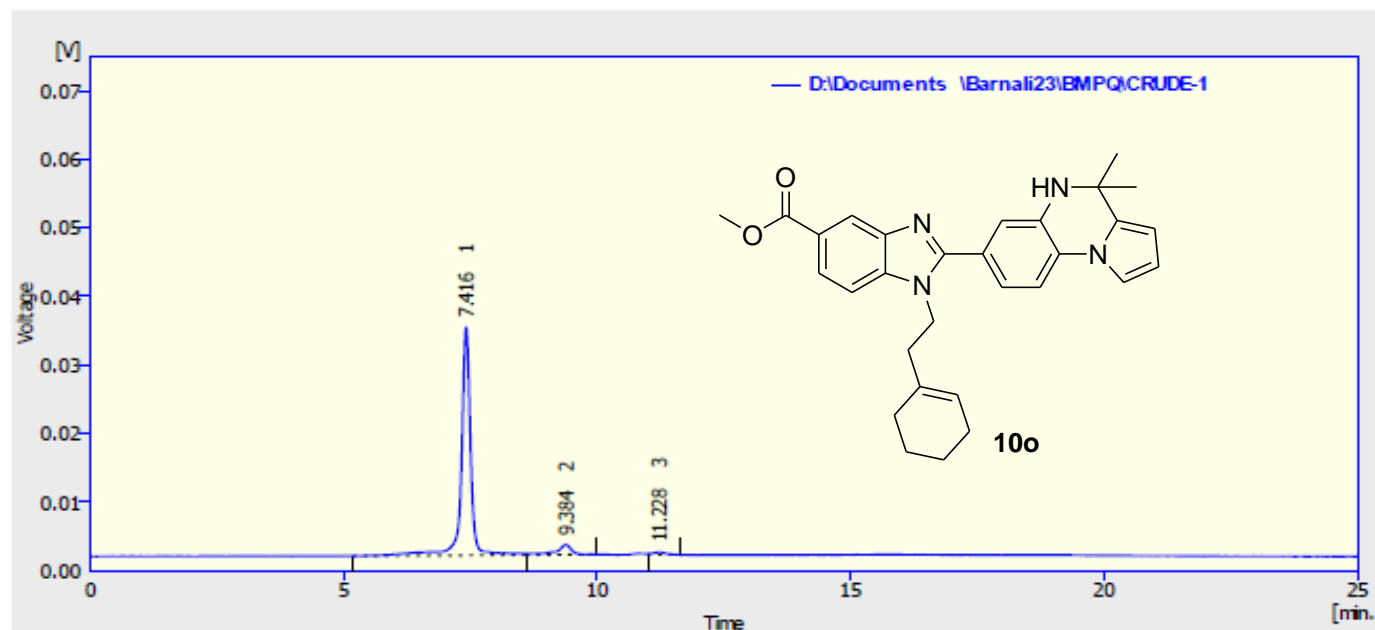

Result Table (Uncal - D:\Documents [Barnali23]BMPQ\CRUDE-1)

|   | Reten. Time [min] | Area [mV.s] | Height [mV] | Area [%] | Height [%] | W05 [min] |
|---|-------------------|-------------|-------------|----------|------------|-----------|
| 1 | 7.416             | 433.877     | 33.306      | 92.1     | 94.9       | 0.16      |
| 2 | 9.384             | 31.917      | 1.468       | 6.8      | 4.2        | 0.24      |
| 3 | 11.228            | 5.079       | 0.328       | 1.1      | 0.9        | 0.25      |
|   | Total             | 470.873     | 35.102      | 100.0    | 100.0      |           |

### Crude HPLC Spectra of Compounds 10o

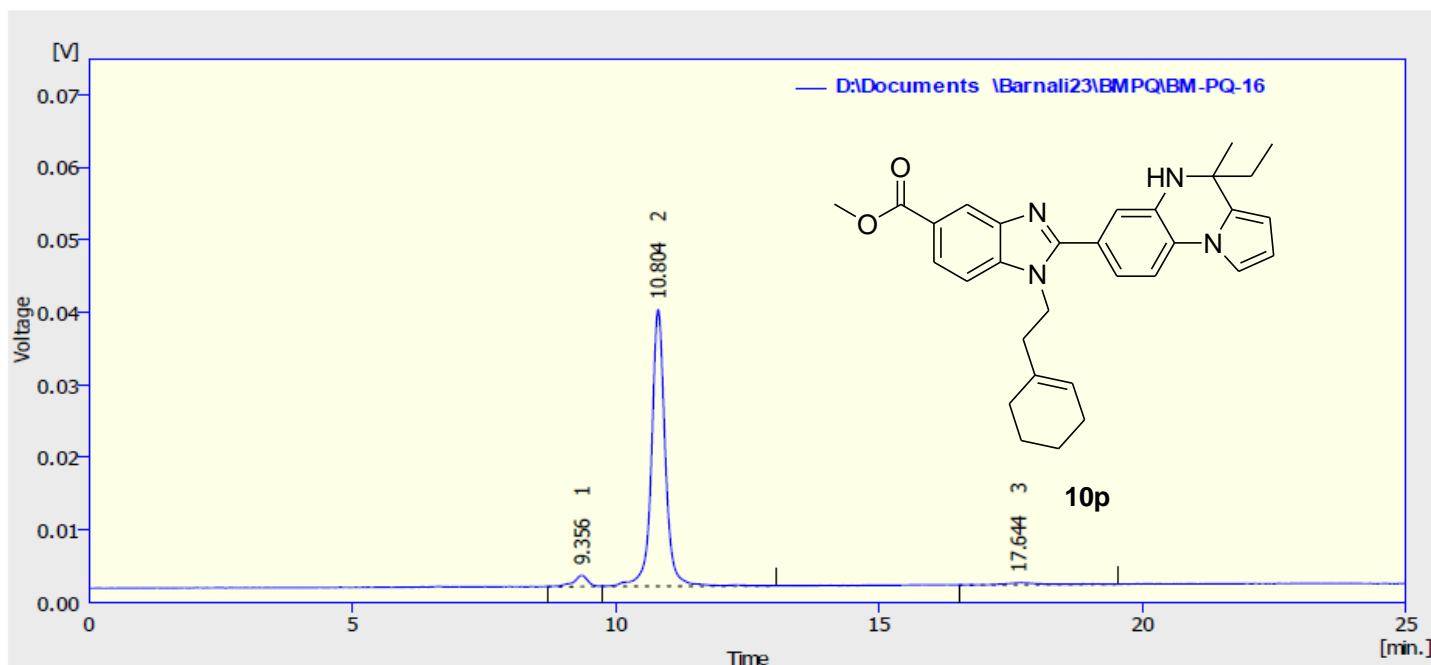

Result Table (Uncal - D:\Documents \Barnali23\BMPQ\BM-PQ-16)

|   | Reten. Time [min] | Area [mV.s] | Height [mV] | Area [%] | Height [%] | W05 [min] |
|---|-------------------|-------------|-------------|----------|------------|-----------|
| 1 | 9.356             | 29.230      | 1.554       | 3.9      | 3.9        | 0.26      |
| 2 | 10.804            | 696.300     | 38.174      | 94.0     | 95.4       | 0.26      |
| 3 | 17.644            | 15.163      | 0.286       | 2.0      | 0.7        | 0.54      |
|   | Total             | 740.693     | 40.013      | 100.0    | 100.0      |           |

### Crude HPLC Spectra of Compounds 10p

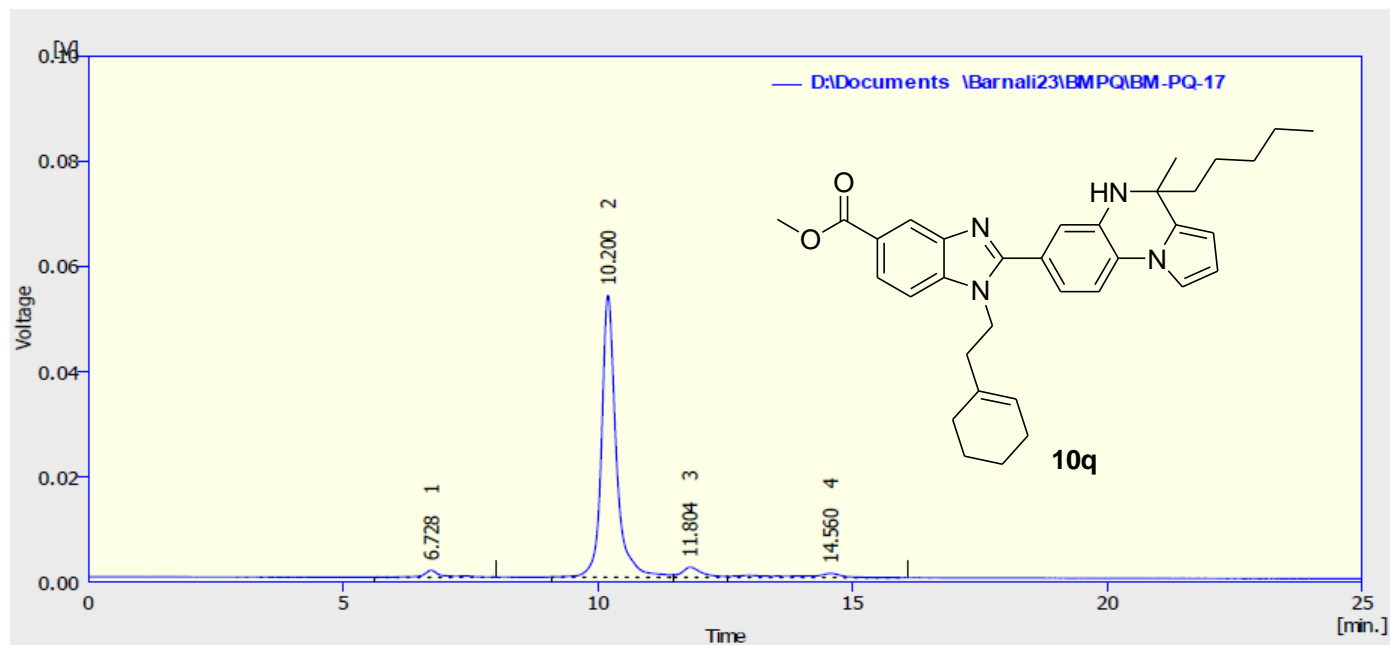

Result Table (Uncal - D:\Documents 1\Barnali23\BMPQ\BM-PQ-17)

|   | Reten. Time<br>[min] | Area<br>[mV.s] | Height<br>[mV] | Area<br>[%] | Height<br>[%] | W05<br>[min] |
|---|----------------------|----------------|----------------|-------------|---------------|--------------|
| 1 | 6.728                | 34.020         | 1.323          | 2.8         | 2.3           | 0.25         |
| 2 | 10.200               | 1076.661       | 53.601         | 88.4        | 92.9          | 0.28         |
| 3 | 11.804               | 52.935         | 1.940          | 4.3         | 3.4           | 0.38         |
| 4 | 14.560               | 54.854         | 0.805          | 4.5         | 1.4           | 0.43         |
|   | Total                | 1218.470       | 57.669         | 100.0       | 100.0         |              |

### Crude HPLC Spectra of Compounds 10q

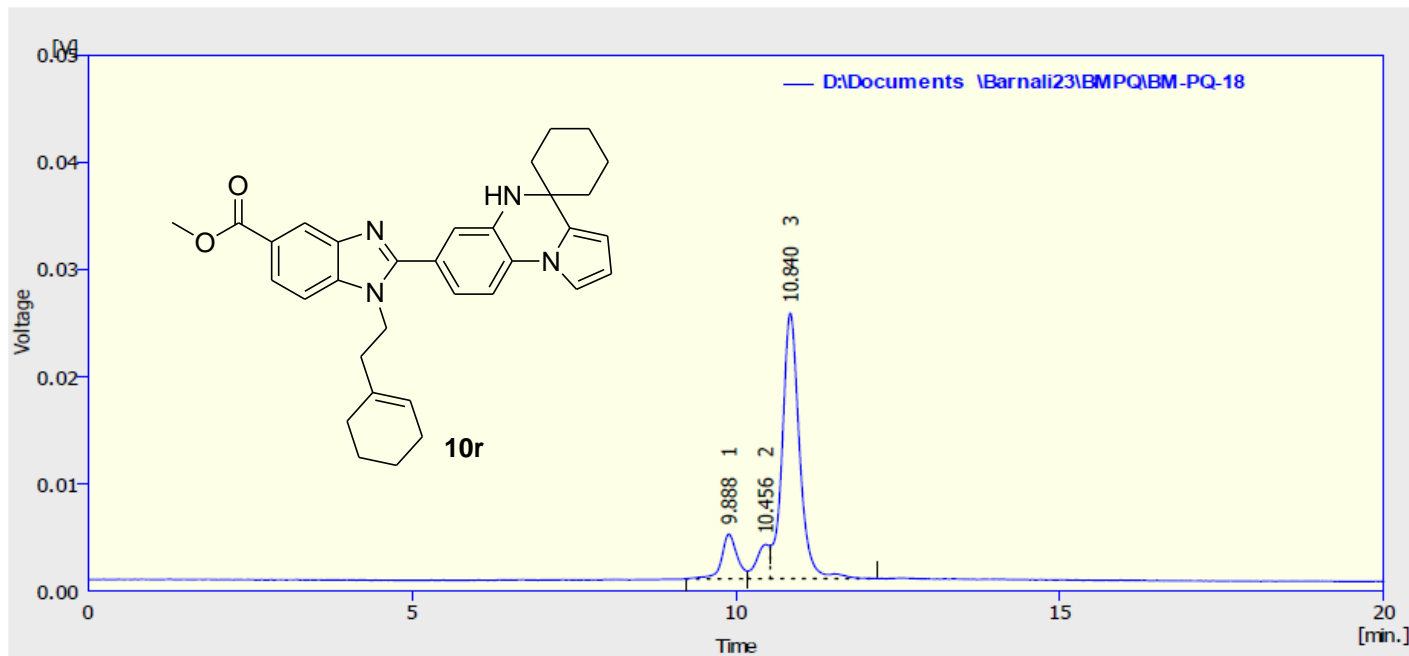

Result Table (Uncal - D:\Documents 1Barnali23\BMPQ\BM-PQ-18)

|   | Reten. Time [min] | Area [mV.s] | Height [mV] | Area [%] | Height [%] | W05 [min] |
|---|-------------------|-------------|-------------|----------|------------|-----------|
| 1 | 9.888             | 70.440      | 4.181       | 12.2     | 13.0       | 0.24      |
| 2 | 10.456            | 43.981      | 3.207       | 7.6      | 10.0       | 0.22      |
| 3 | 10.840            | 463.854     | 24.786      | 80.2     | 77.0       | 0.27      |
|   | Total             | 578.274     | 32.174      | 100.0    | 100.0      |           |

## Crude HPLC Spectra of Compounds 10r

S55



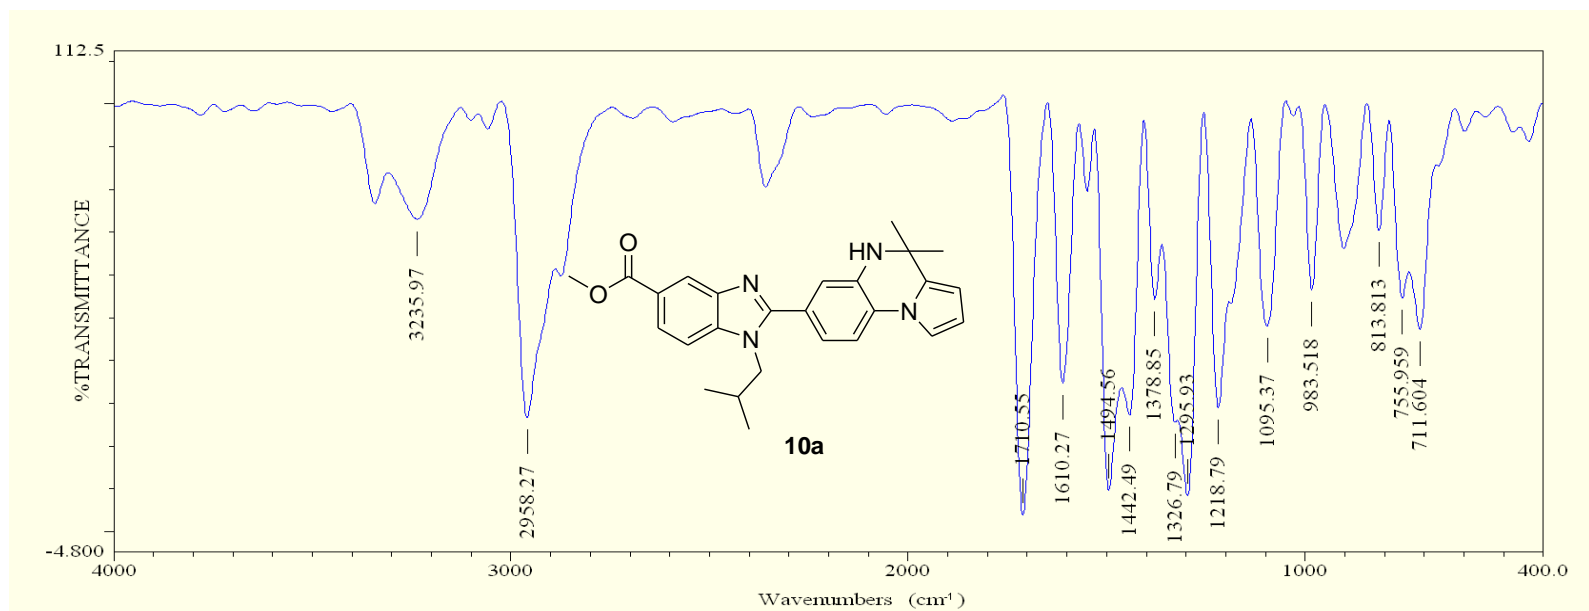

**IR spectra of Compounds 10a**

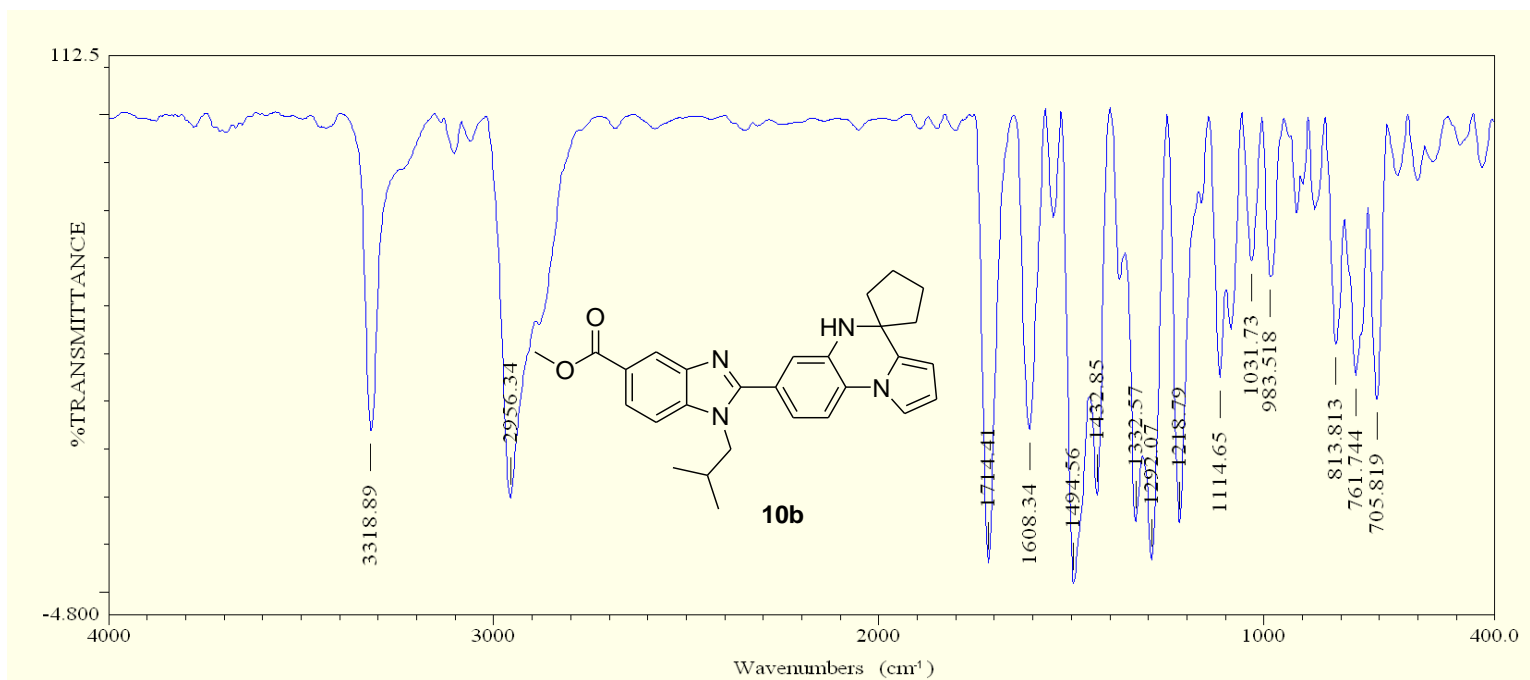

**IR spectra of Compounds 10b**

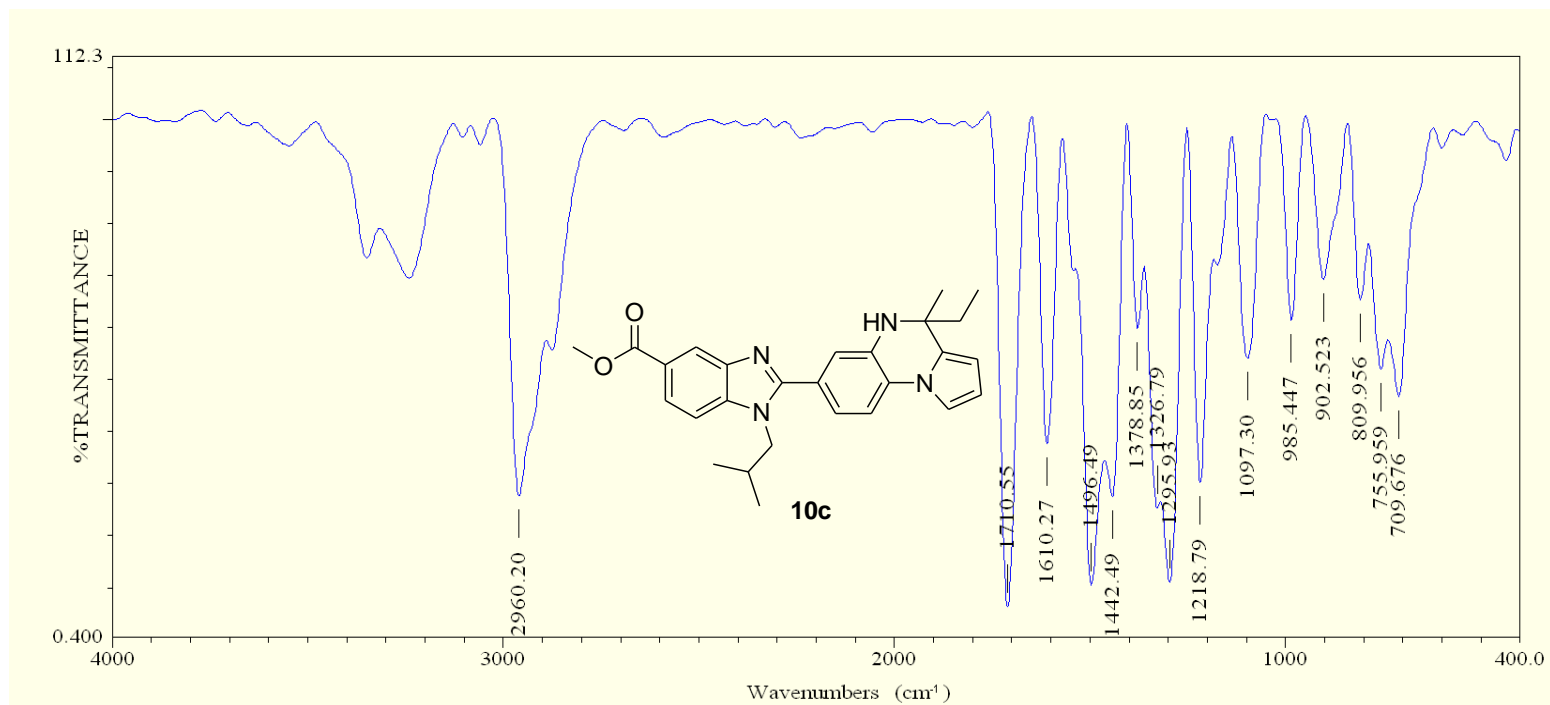

**IR spectra of Compounds 10c**

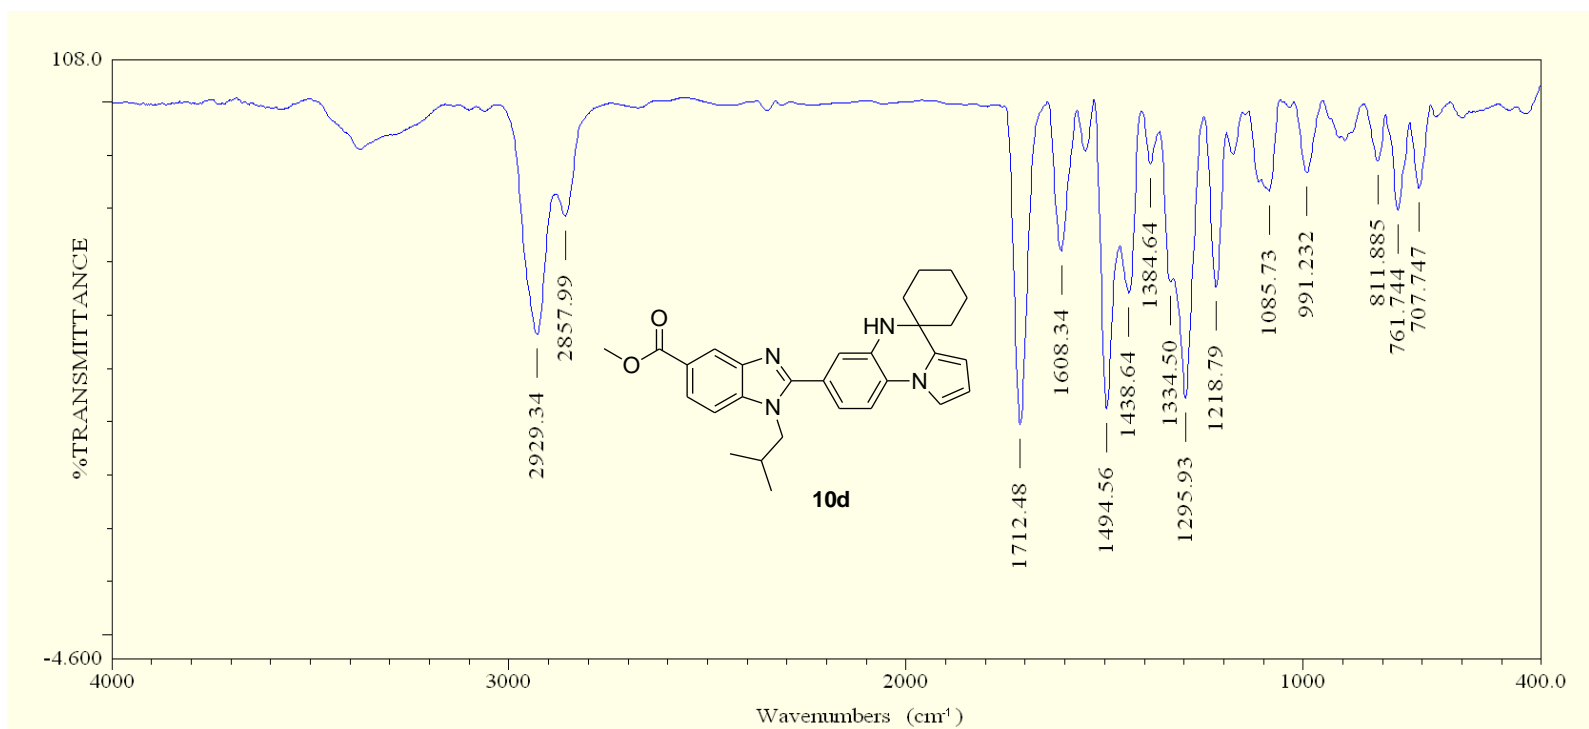

**IR spectra of Compounds 10d**

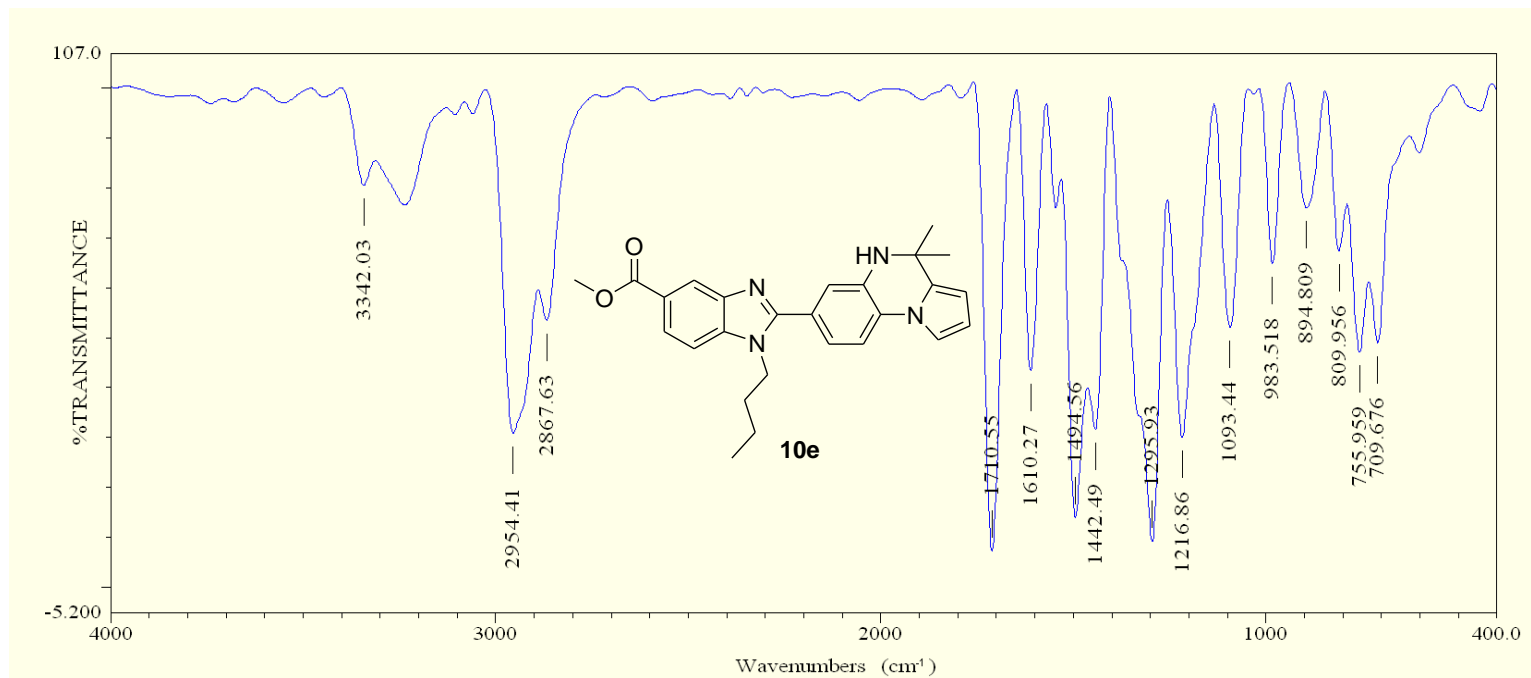

**IR spectra of Compounds 10e**

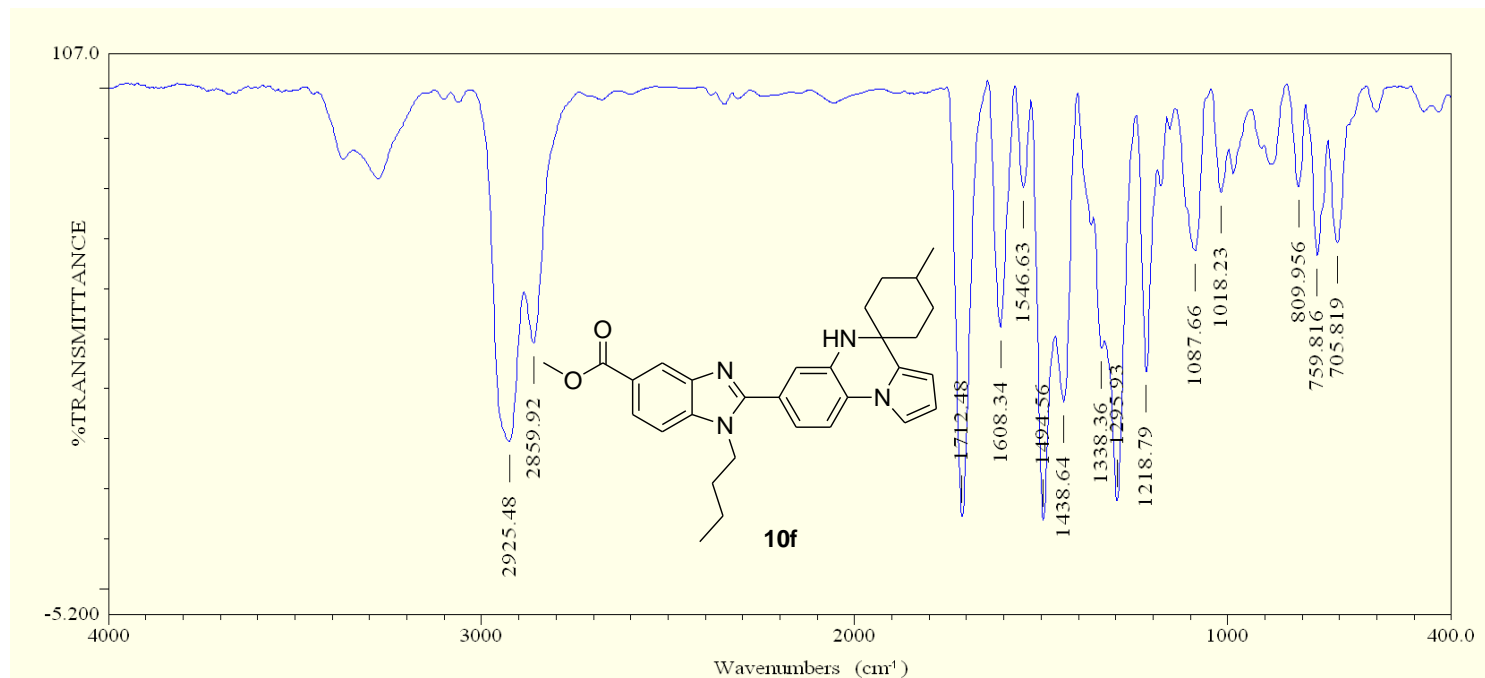

**IR spectra of Compounds 10f**

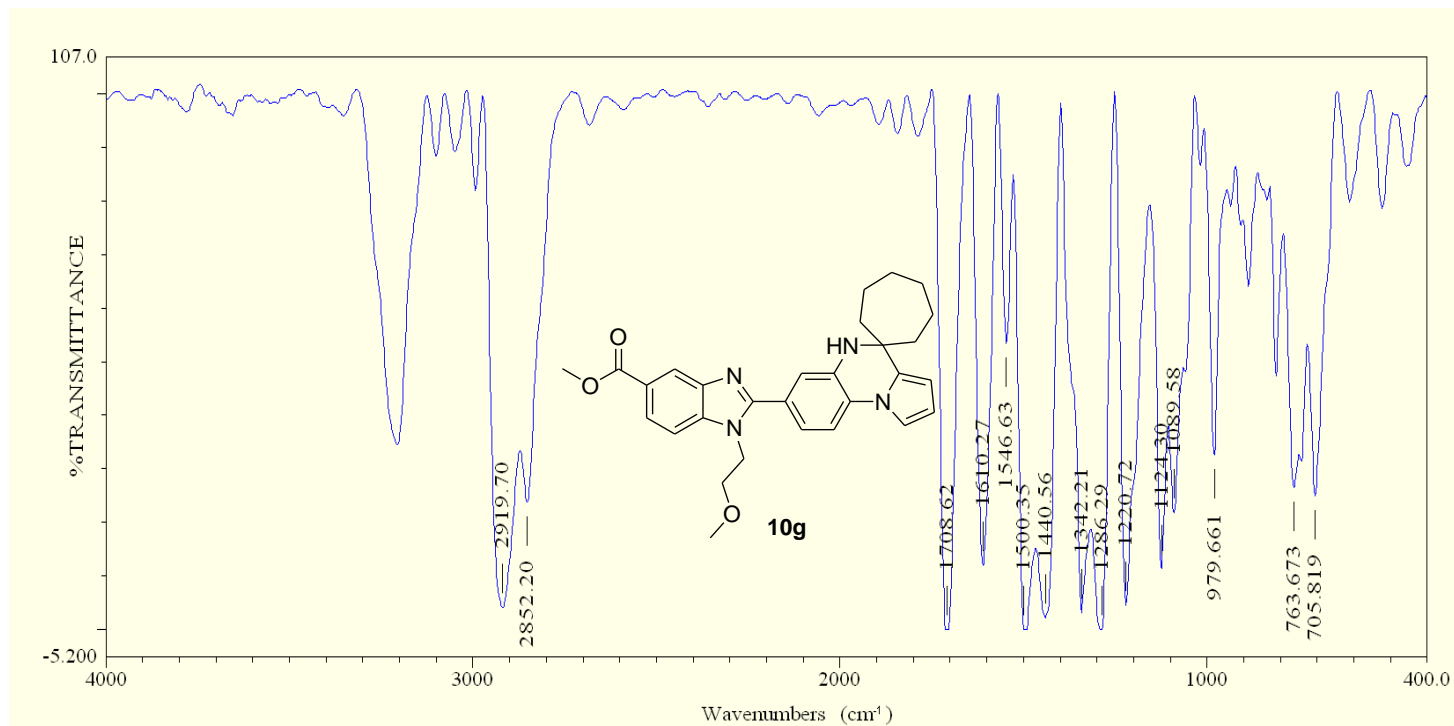

**IR spectra of Compounds 10g**

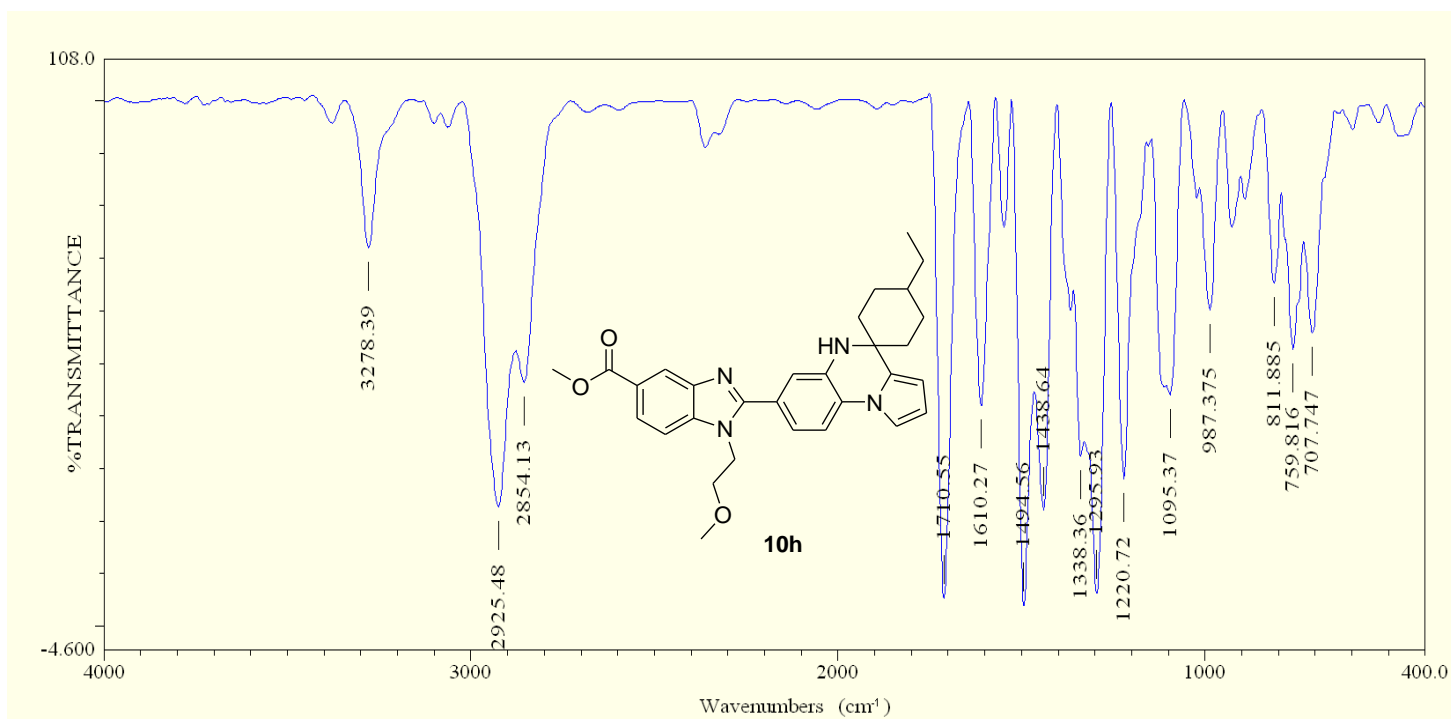

**IR spectra of Compounds 10h**



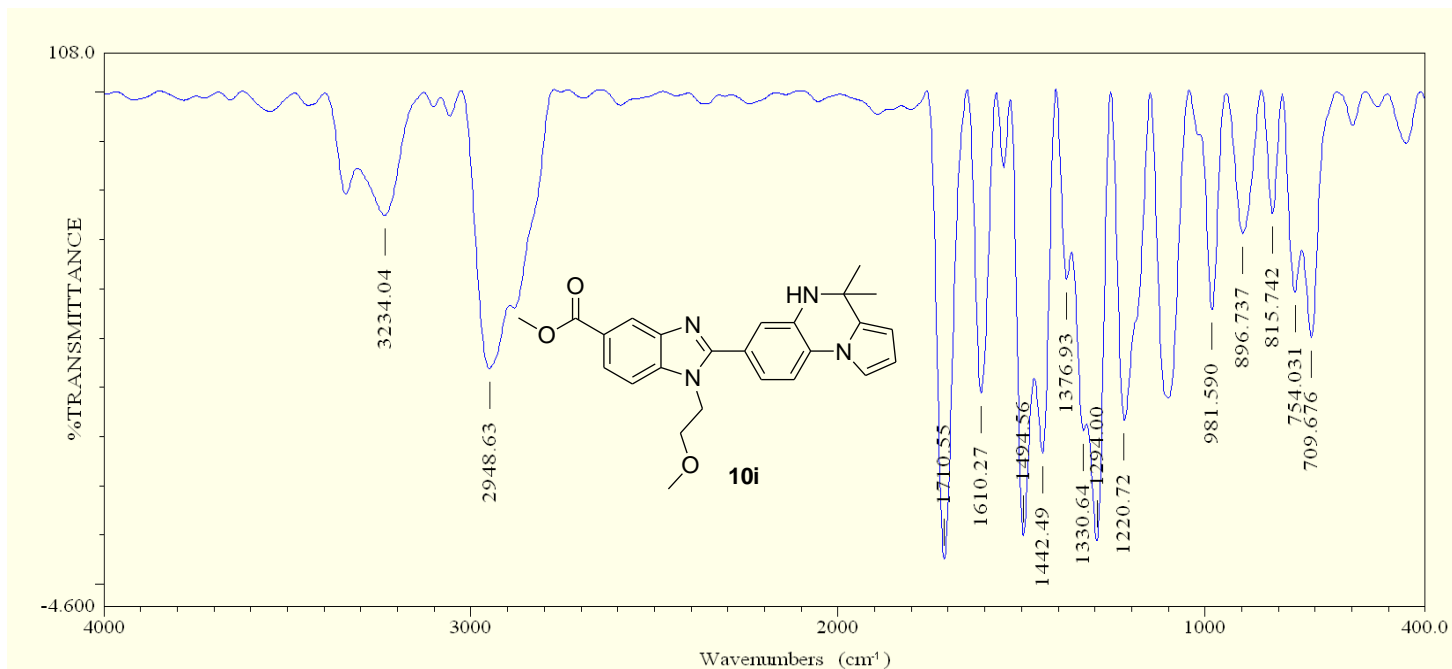

**IR spectra of Compounds 10i**

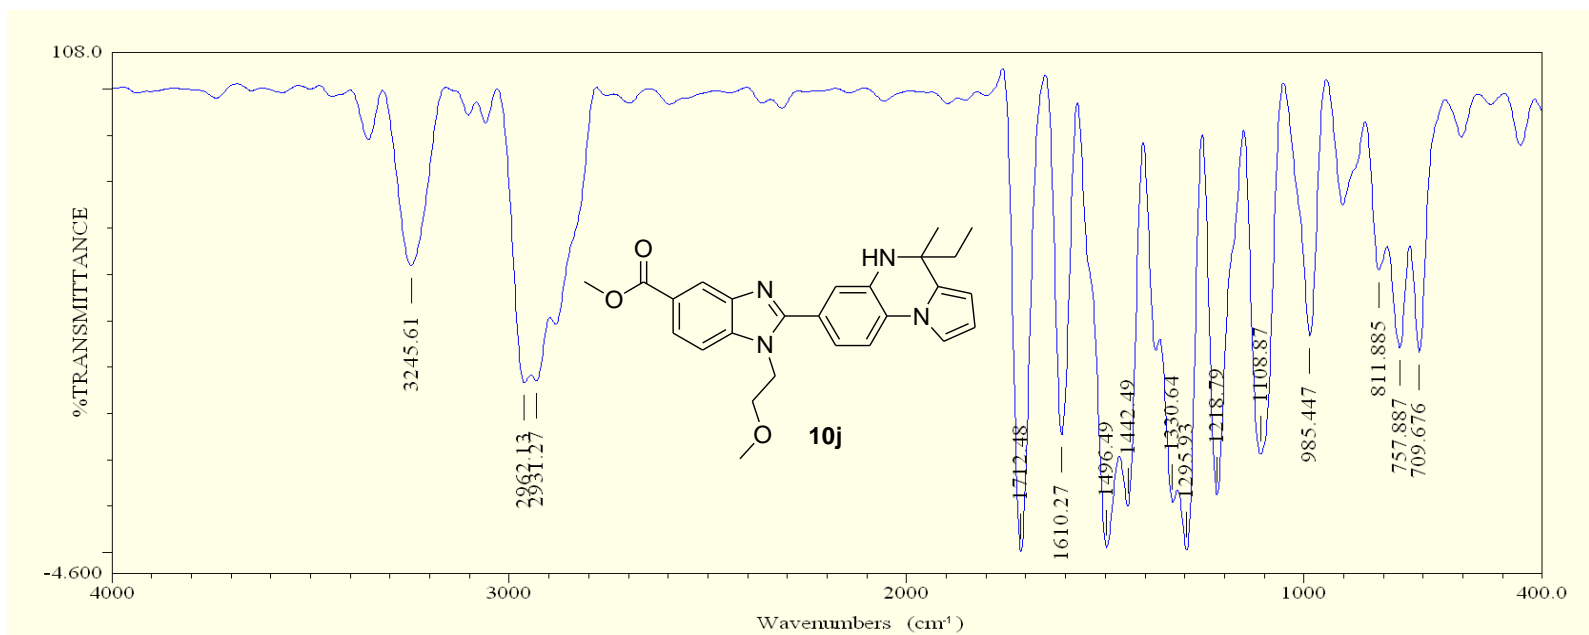

**IR spectra of Compounds 10j**

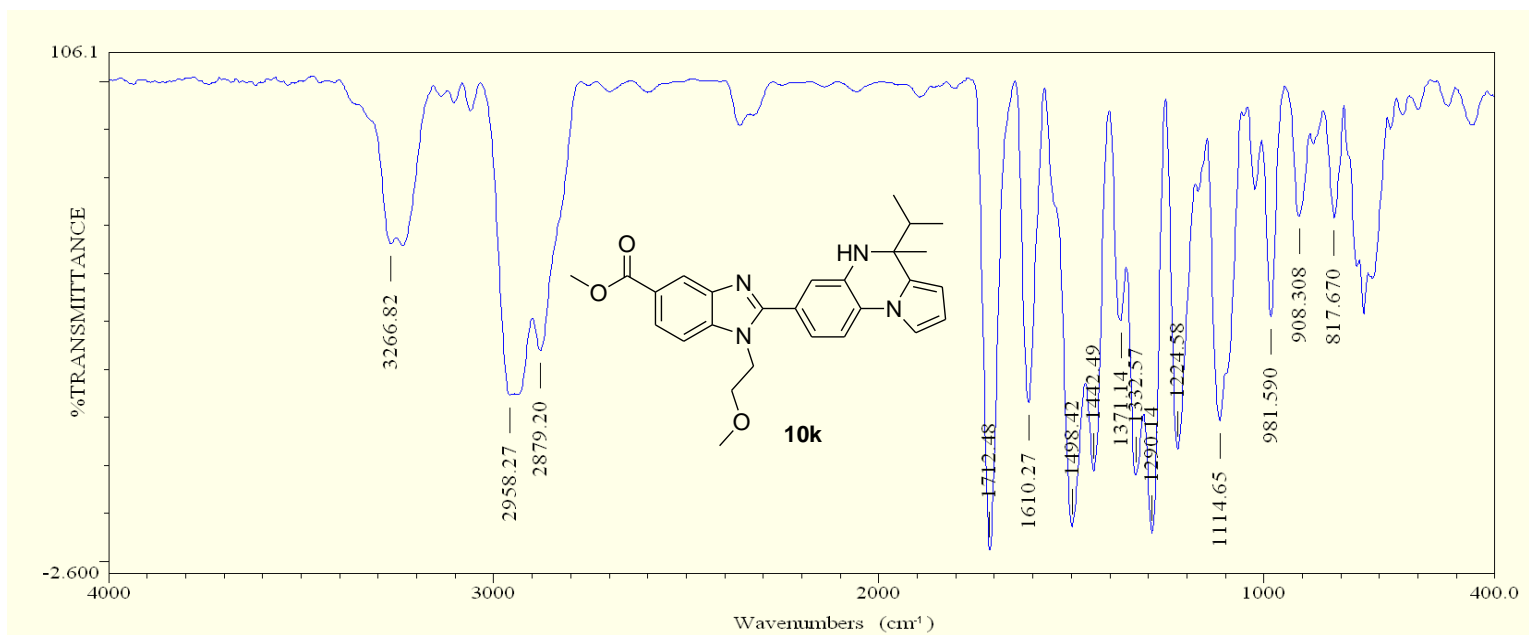

**IR spectra of Compounds 10k**

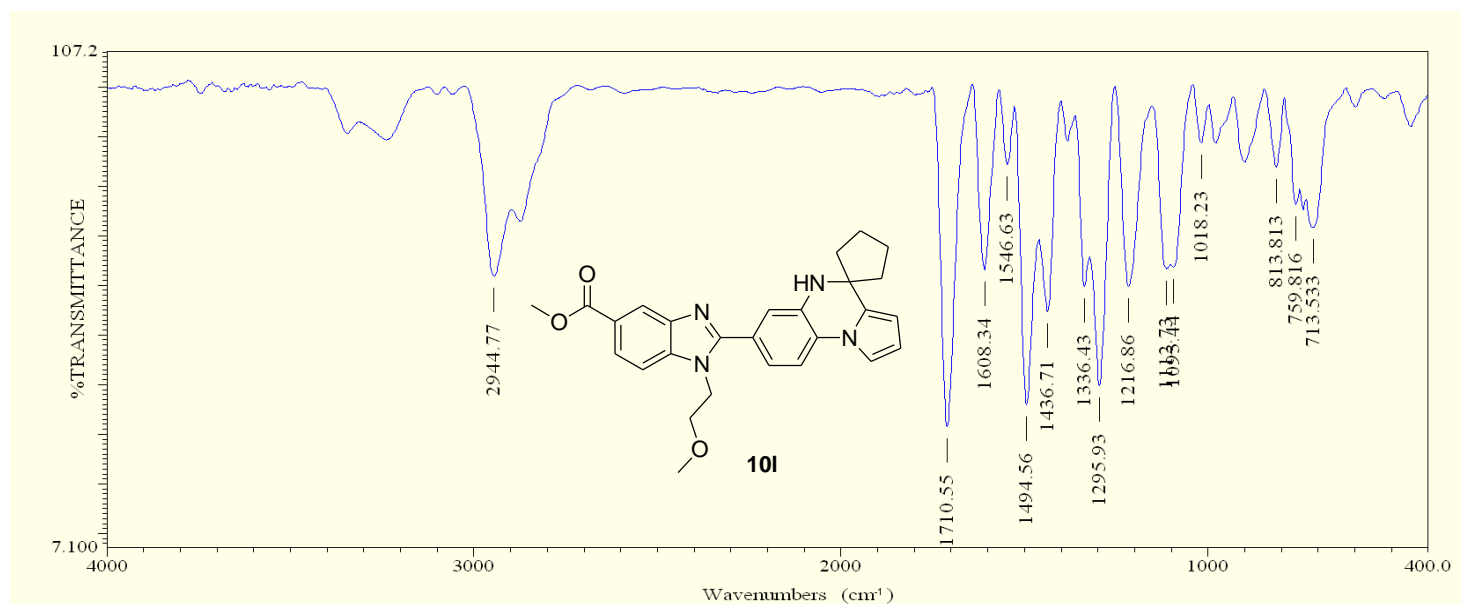

**IR spectra of Compounds 101**

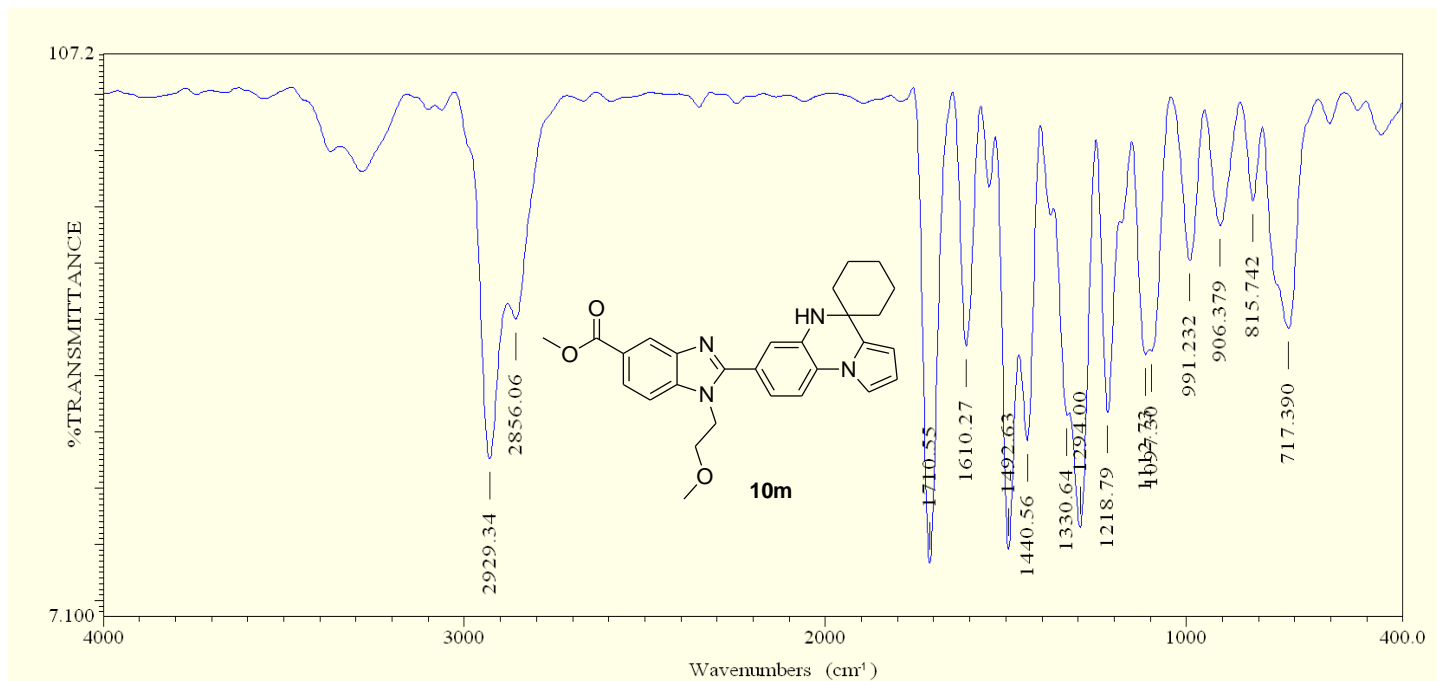

**IR spectra of Compounds 10m**

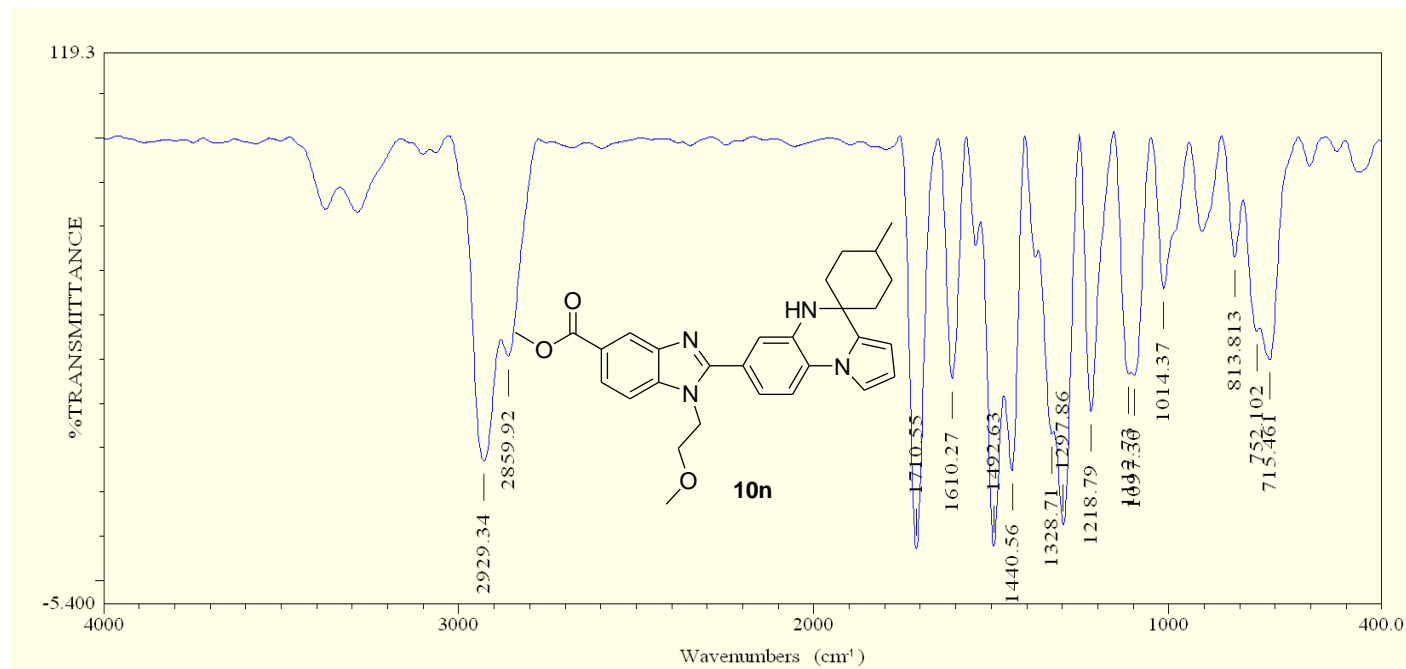

**IR spectra of Compounds 10n**

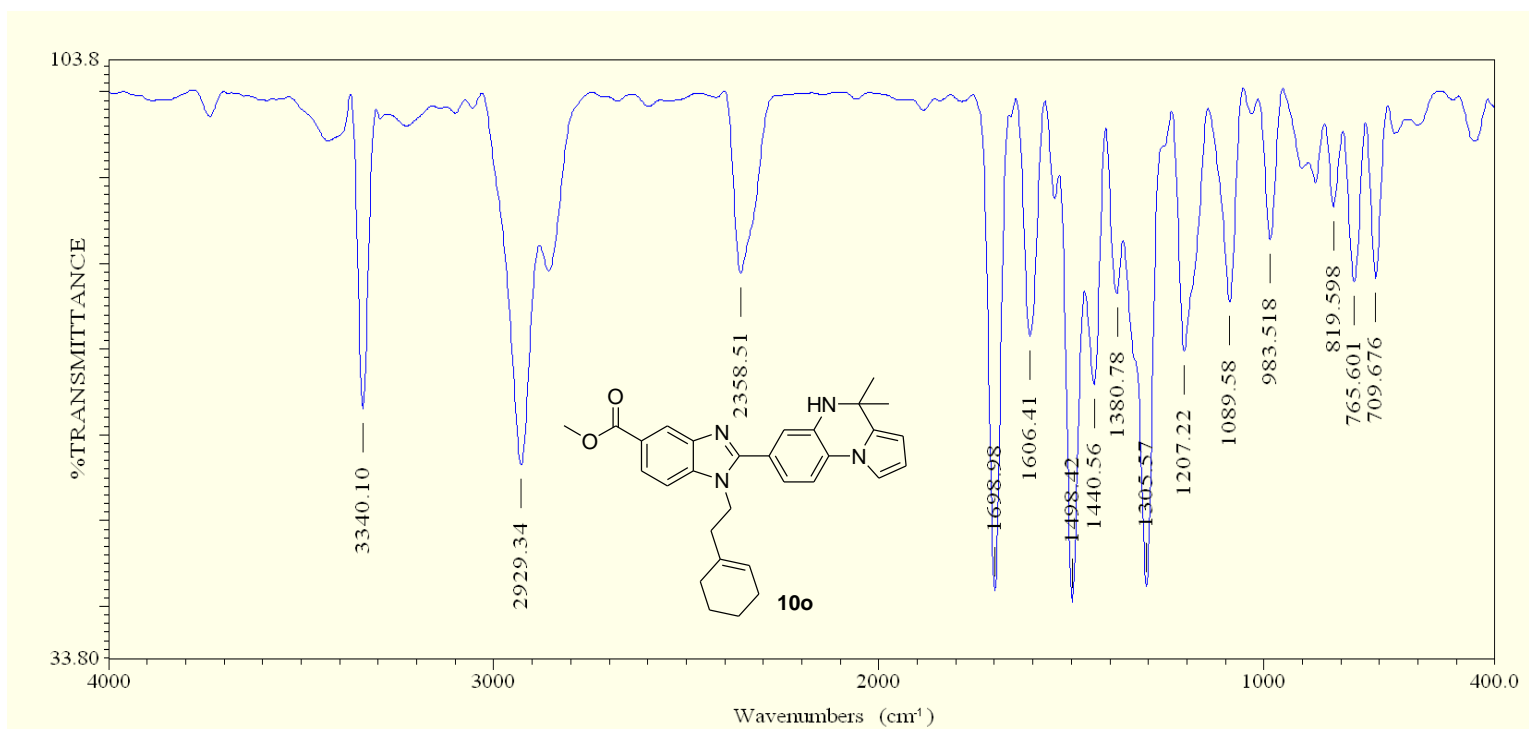

**IR spectra of Compounds 10o**

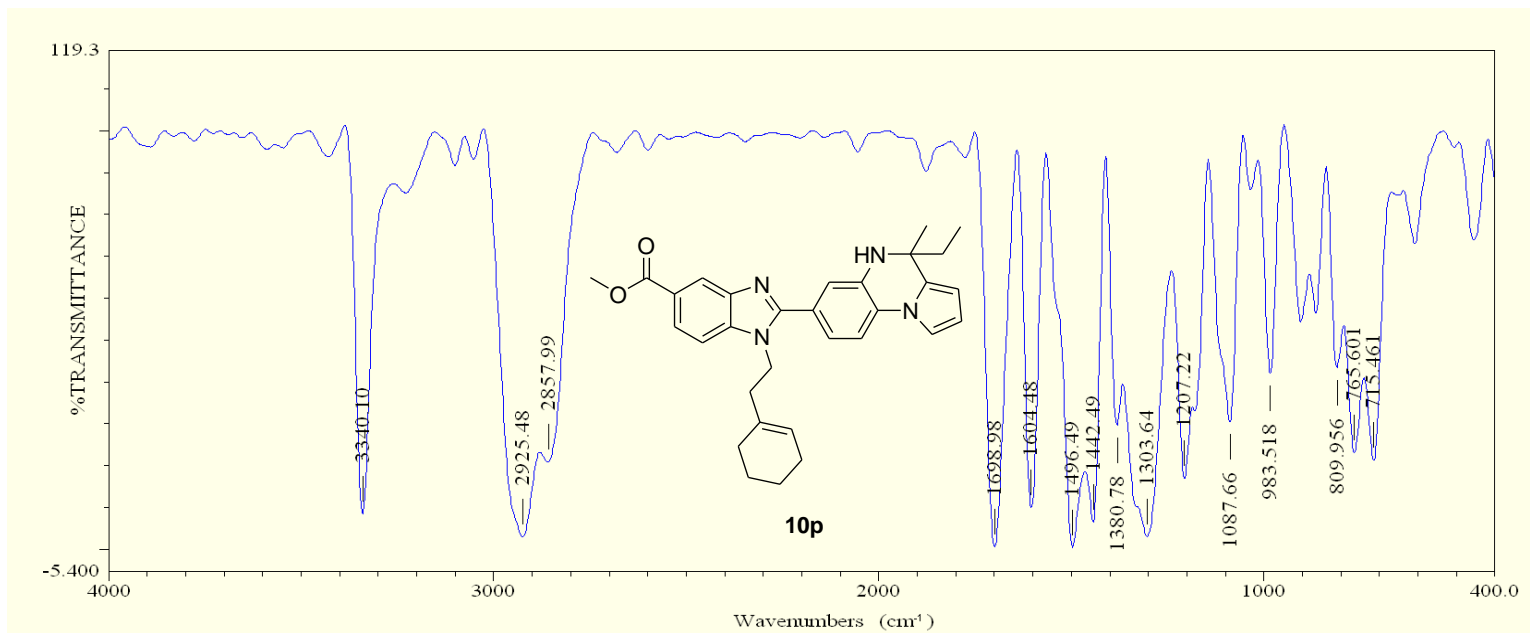

**IR spectra of Compounds 10p**



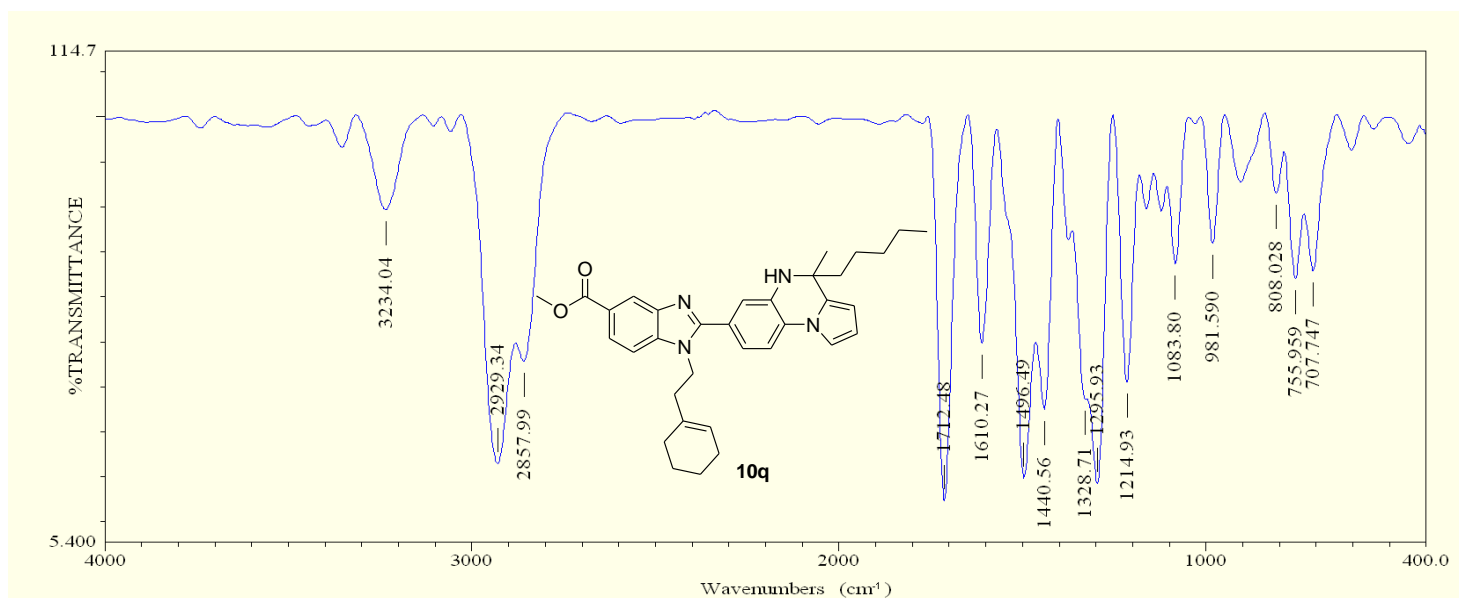

**IR spectra of Compounds 10q**

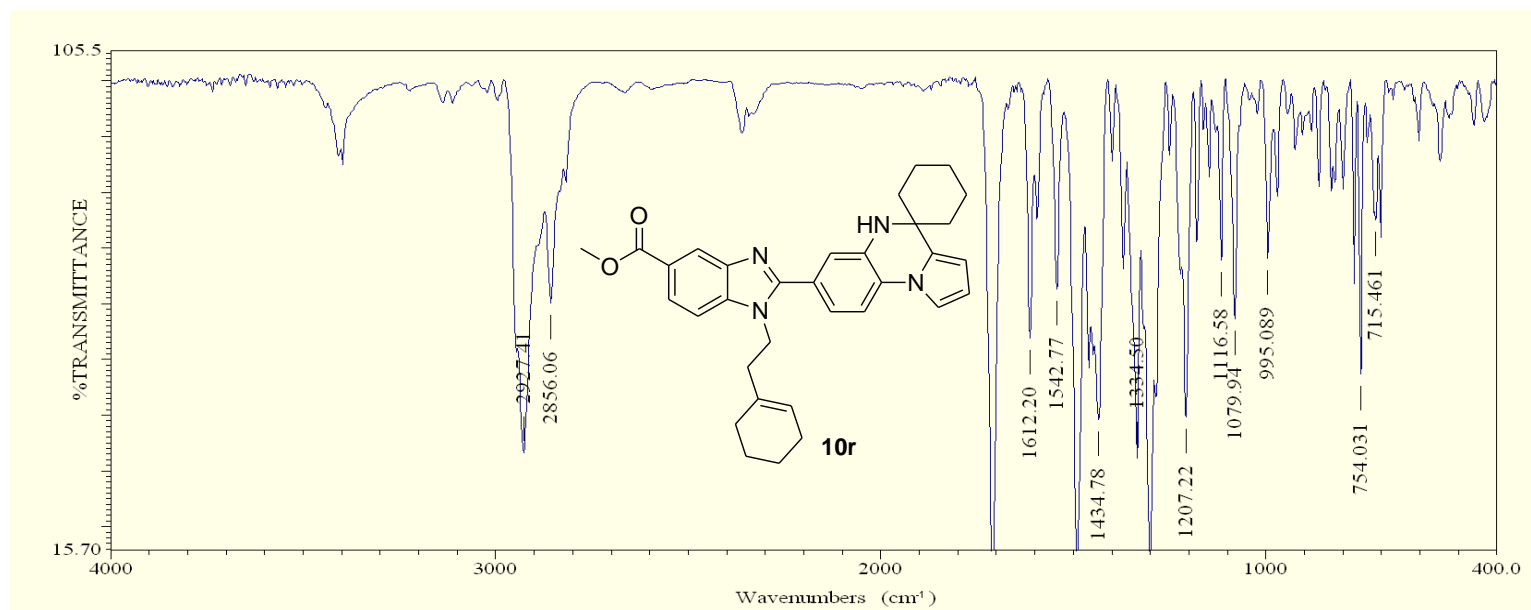

**IR spectra of Compounds 10r**

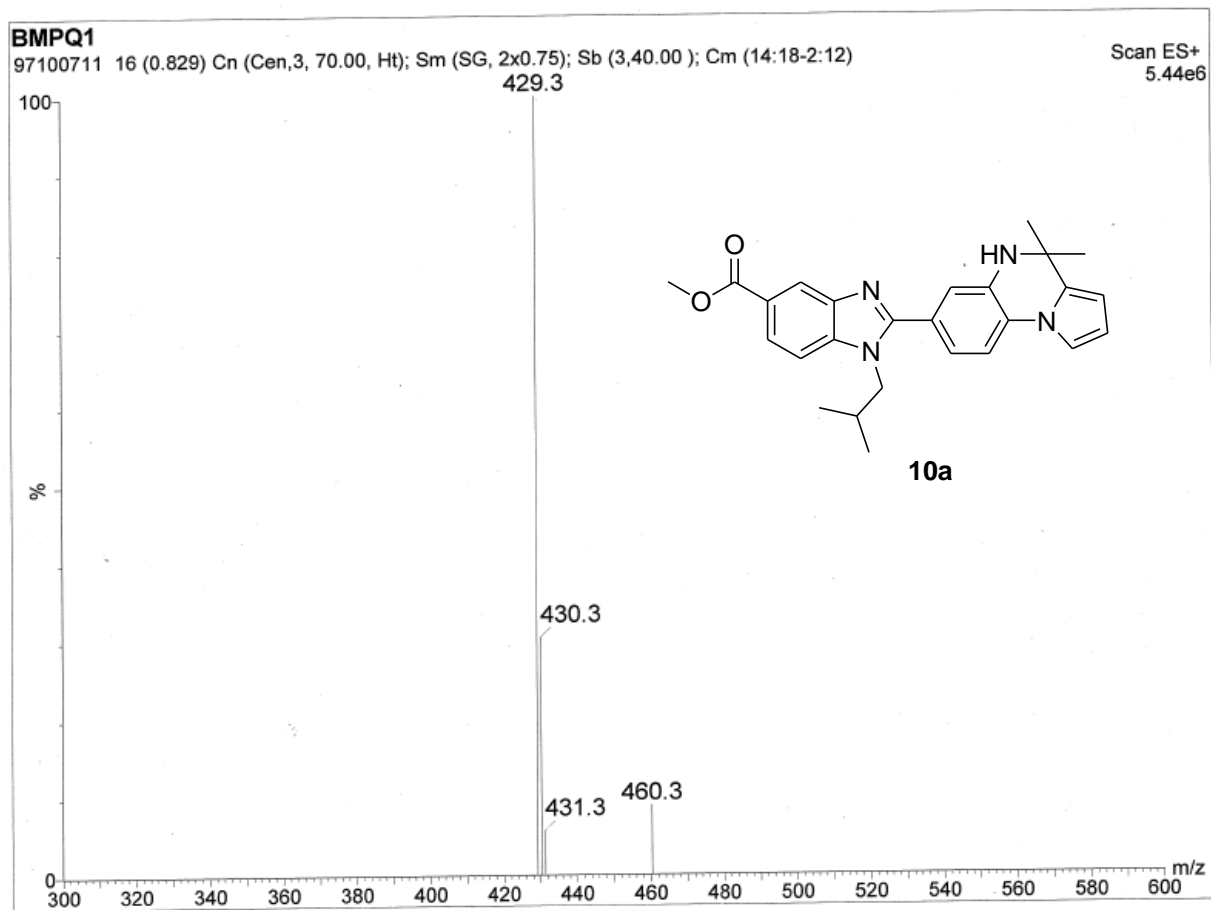

### LR Mass spectra of Compounds 10a

S74

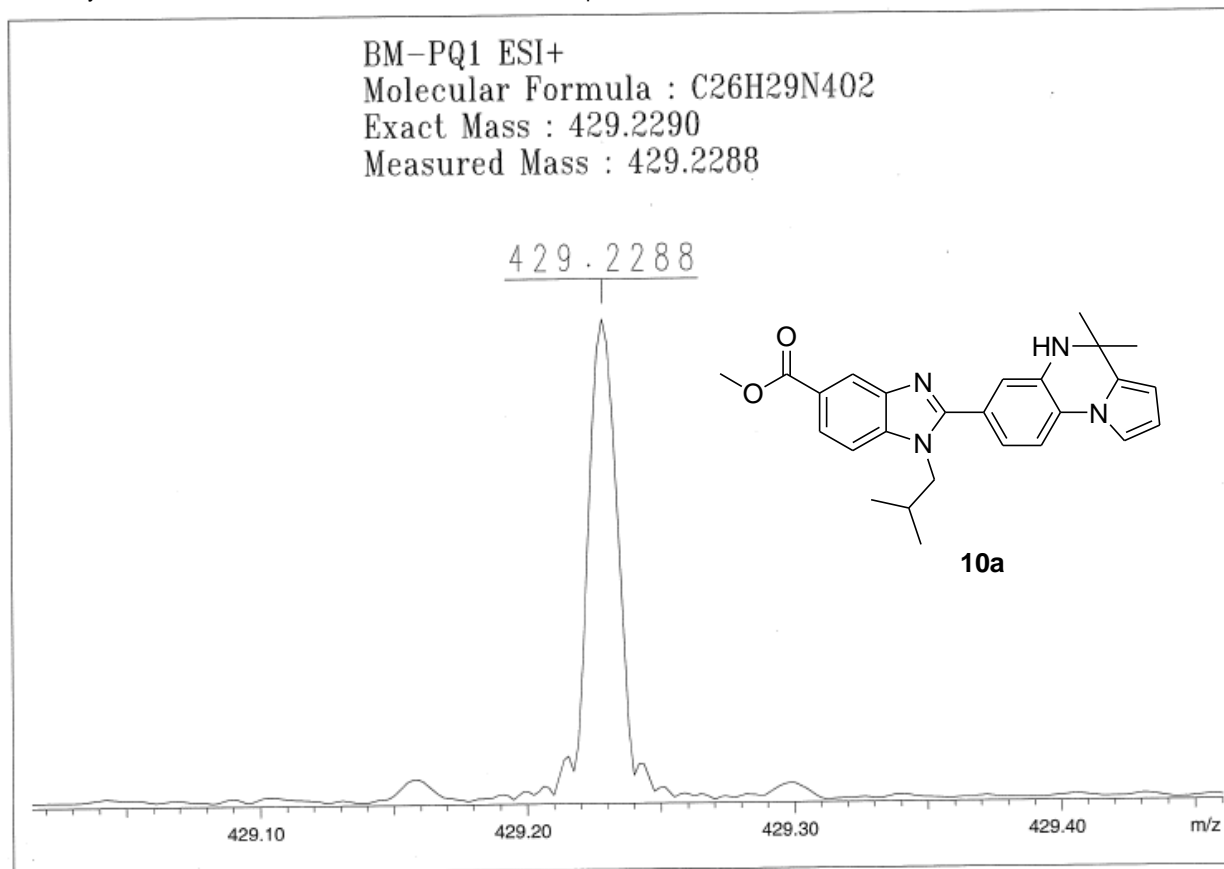

/d=/Data/yl/BMPQ1/2/pdata/1 Administrator Thu Nov 20 15:41:15 2008

### HR Mass spectra of Compounds 10a

S75

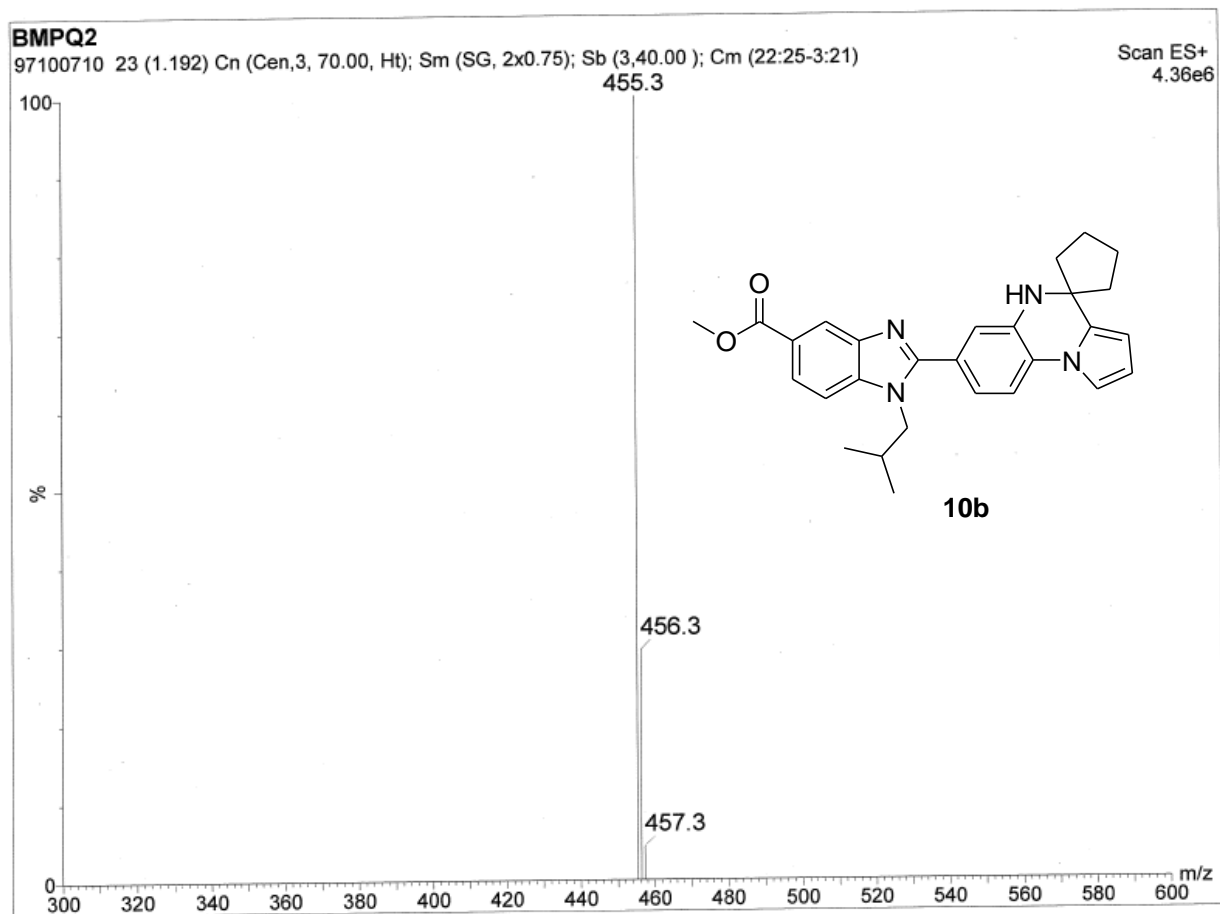

**LR Mass spectra of Compounds 10b**

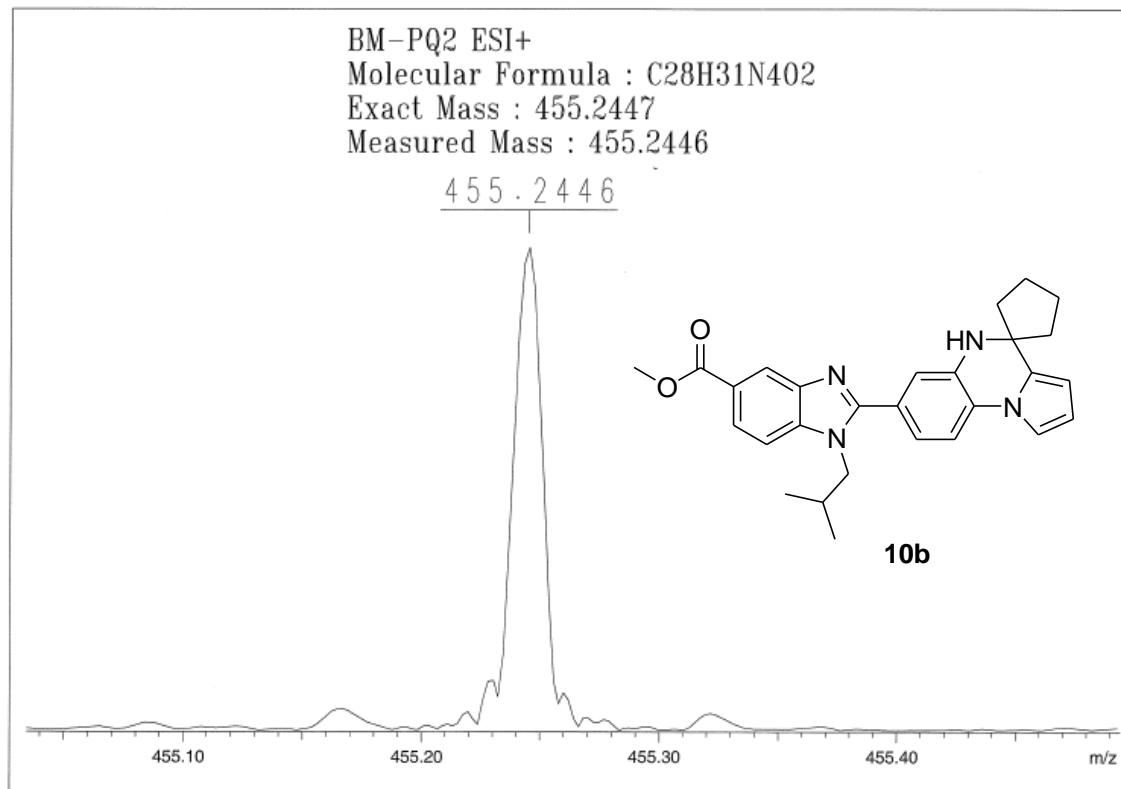

/d=/Data/yu/BMPQ2/2/pdata/1 Administrator Thu Nov 20 15:43:20 2008

### HR Mass spectra of Compounds 10b

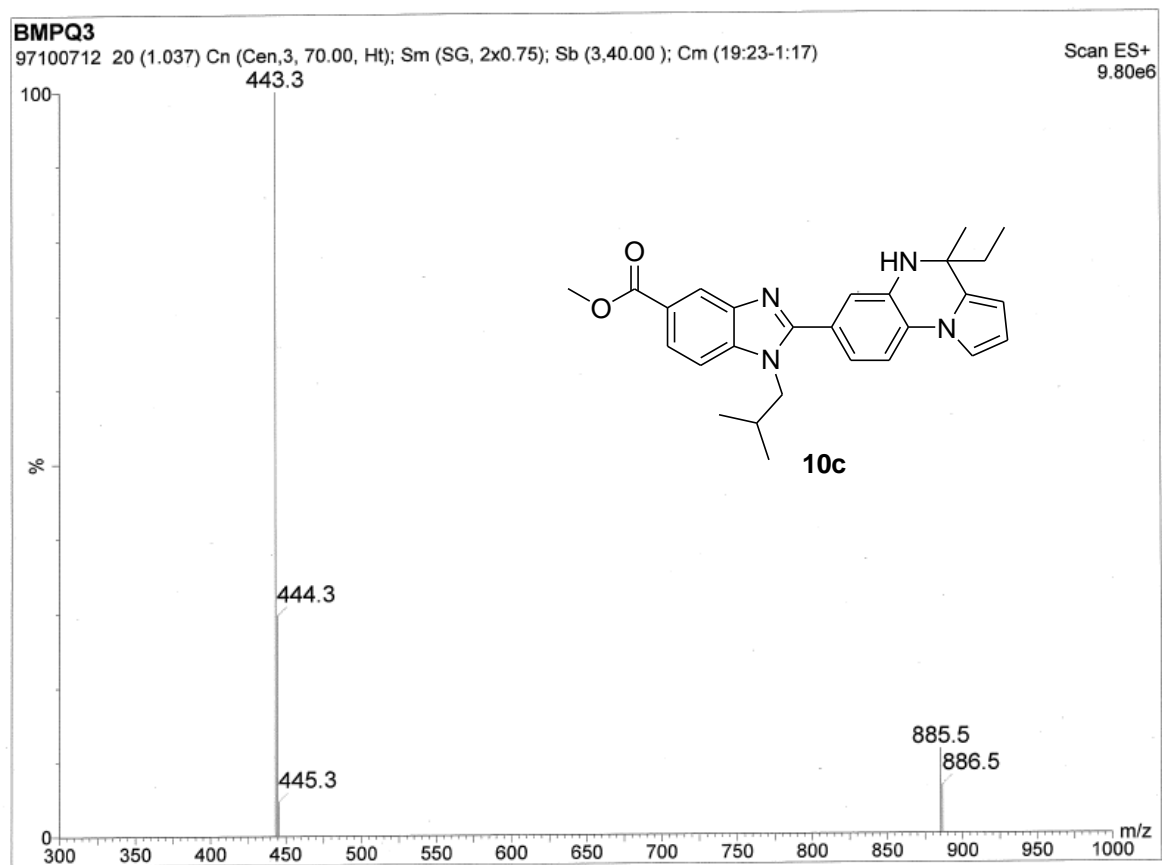

**LR Mass spectra of Compounds 10c**

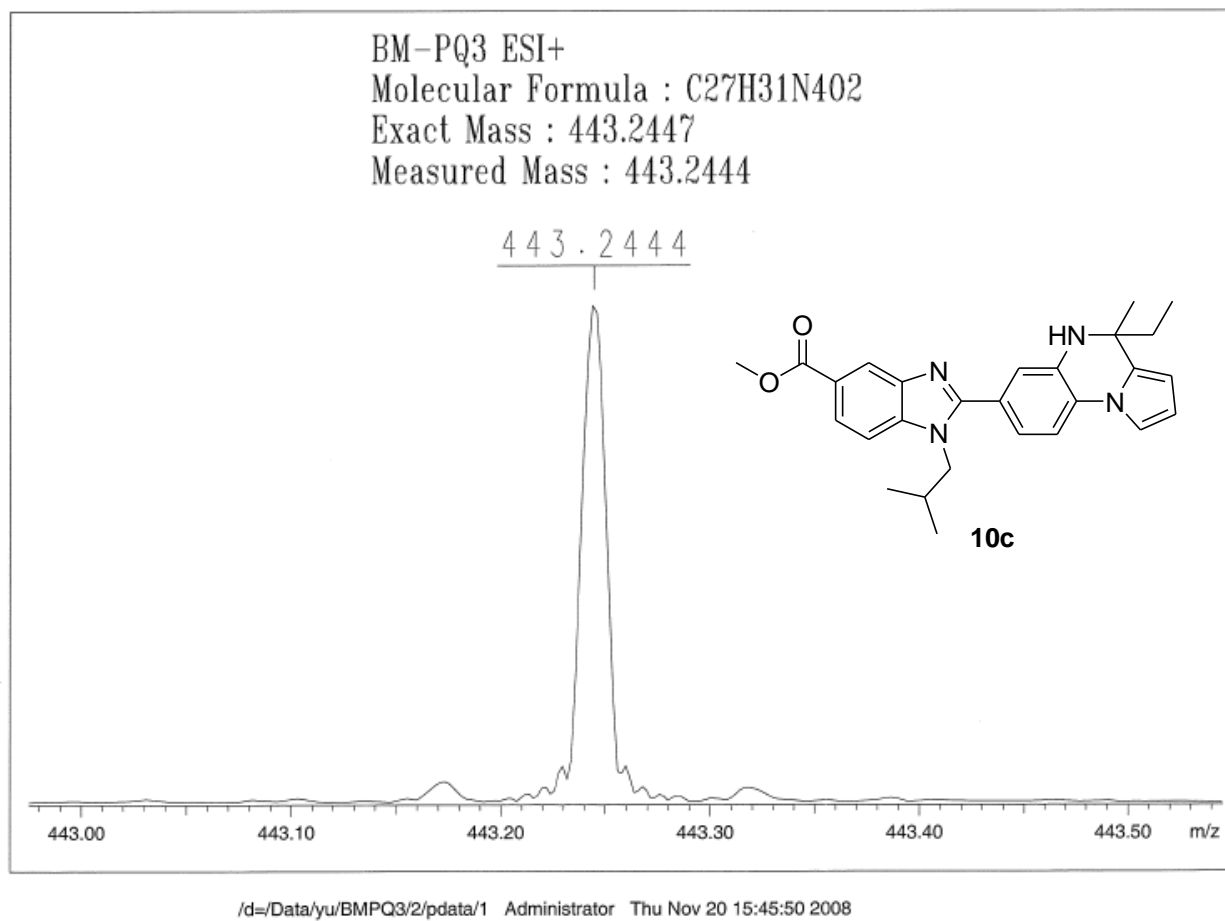

### HR Mass spectra of Compounds 10c



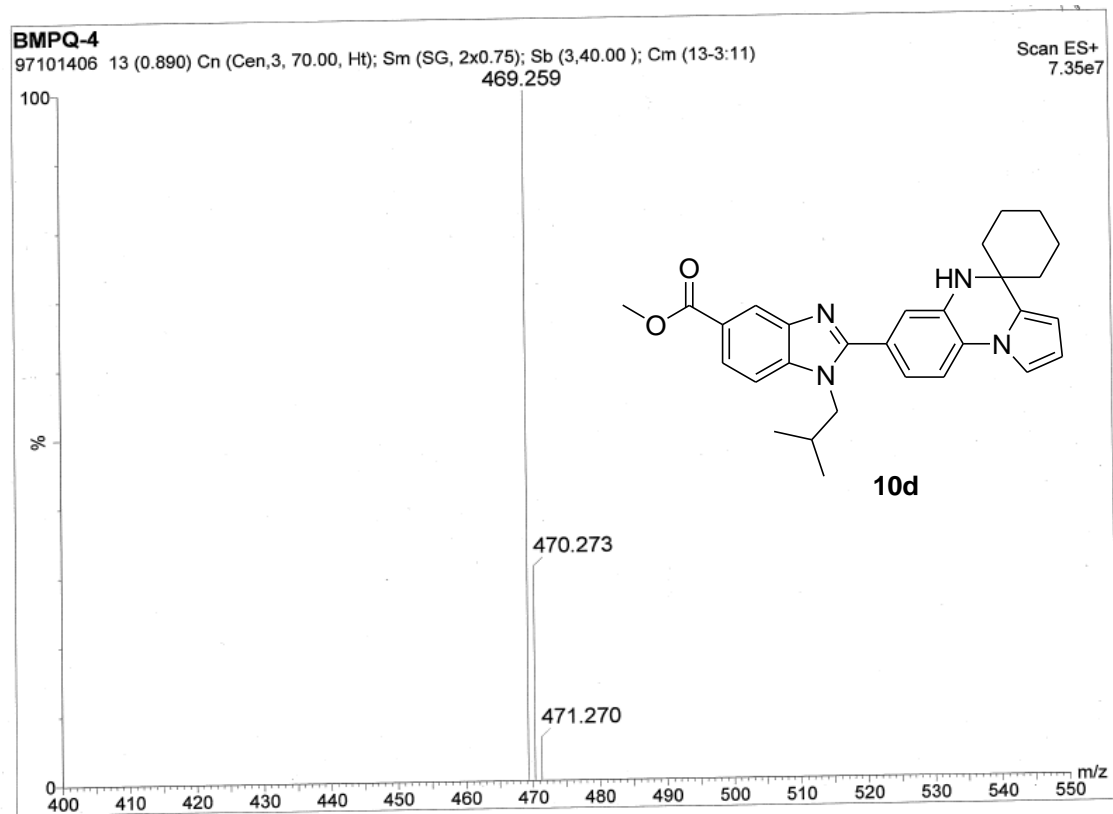

**LR Mass spectra of Compounds 10d**

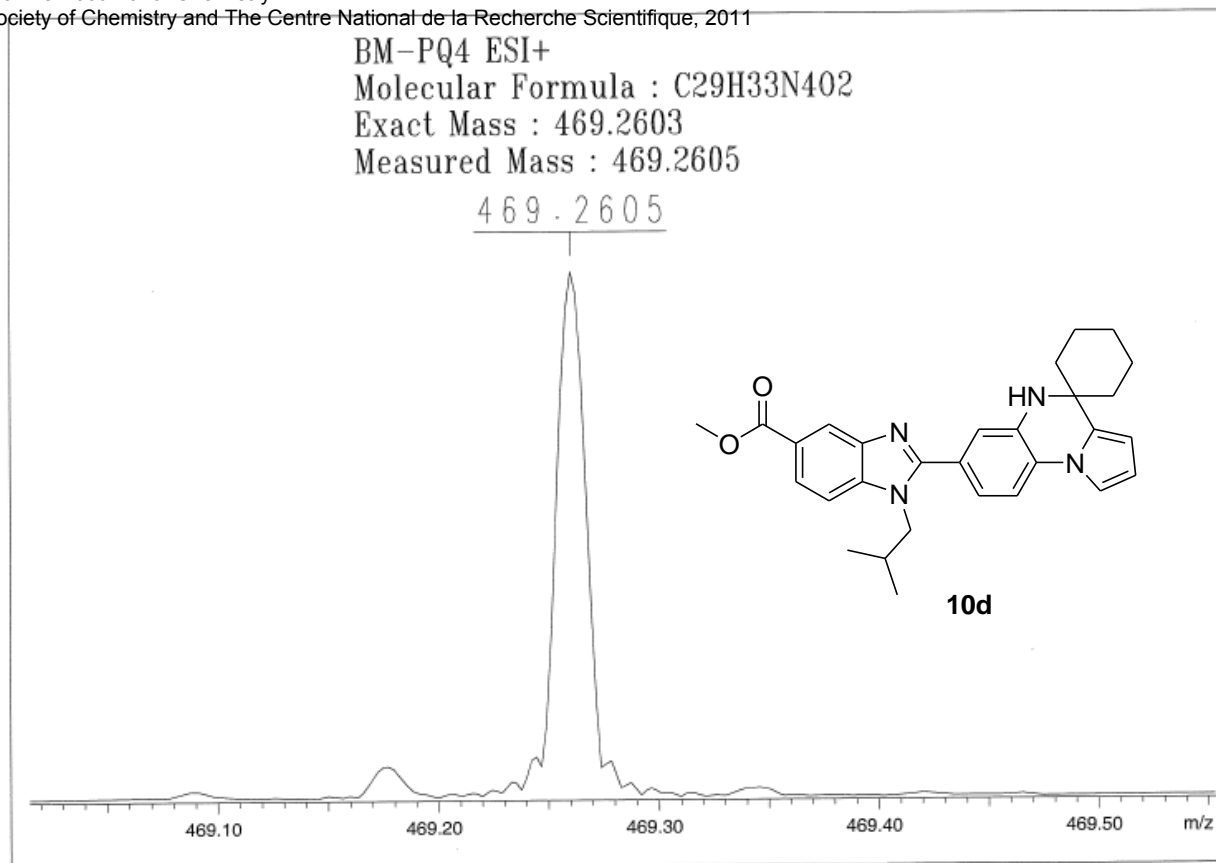

/d=/Data/yl/BMPQ4/2/pdata/1 Administrator Thu Nov 20 15:47:48 2008

### HR Mass spectra of Compounds 10d

S81

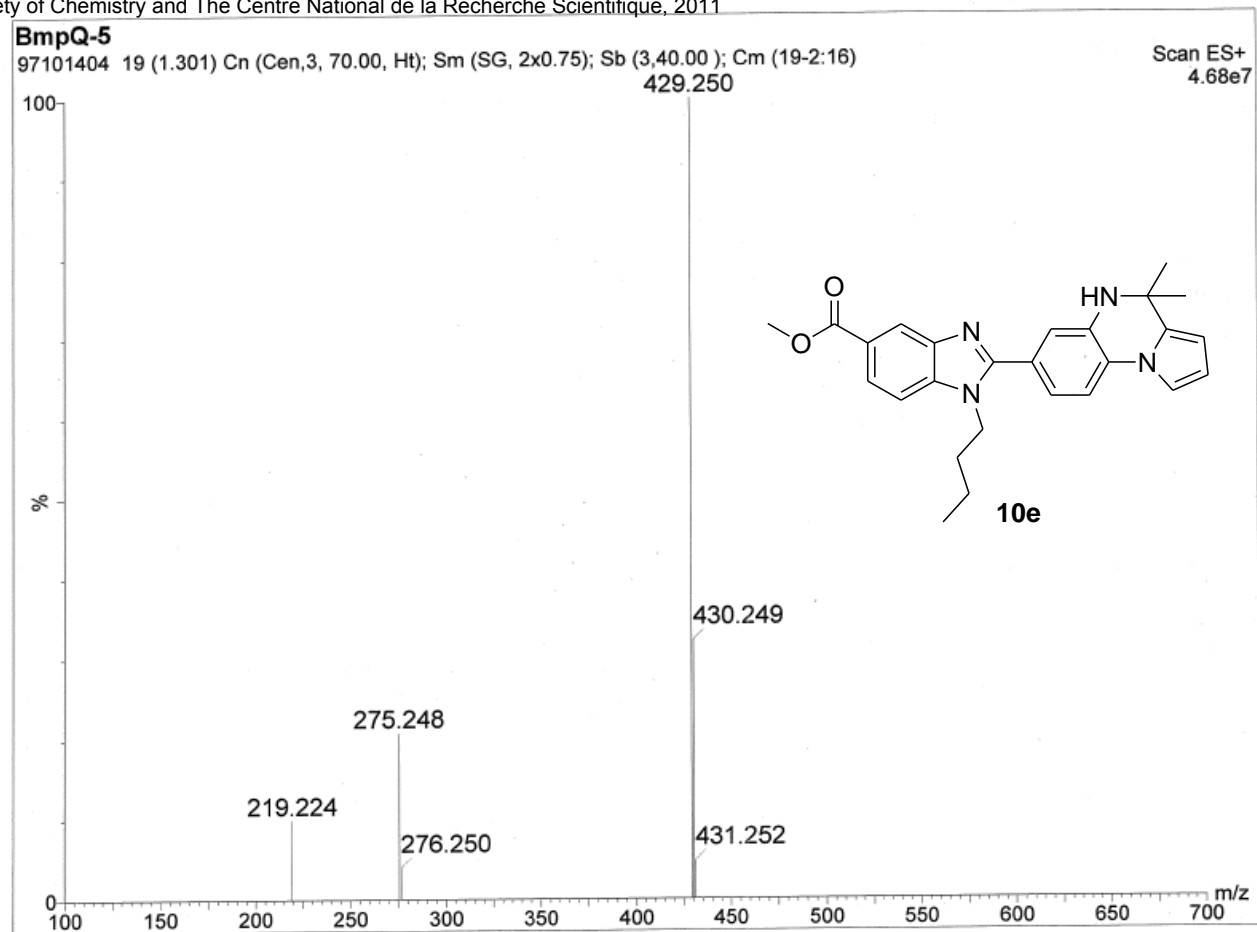

### LR Mass spectra of Compounds 10e

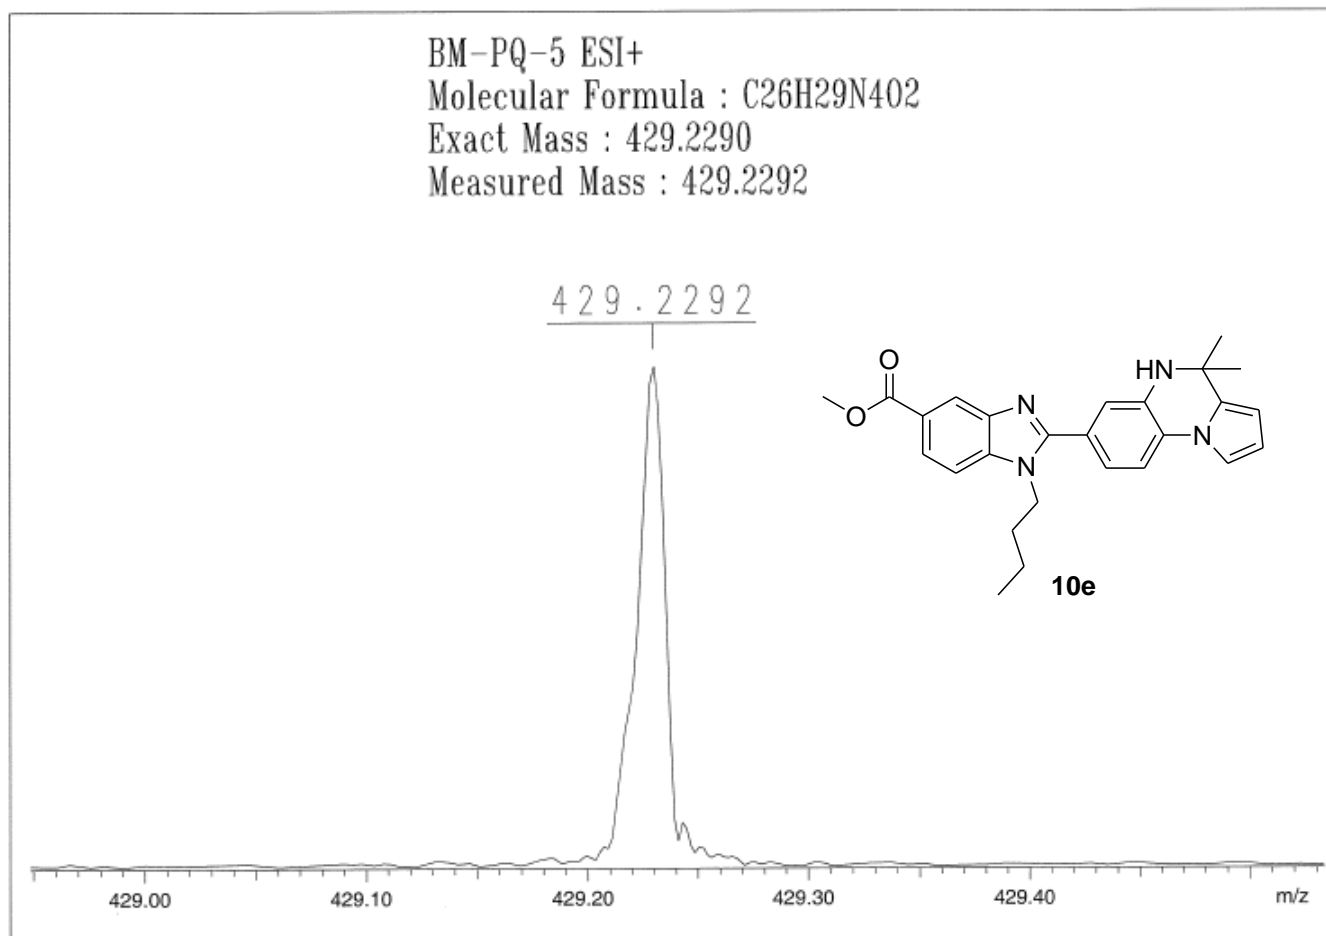

/d=/Data/you/bmpq5/3/pdata/1 Administrator Wed Nov 19 14:27:46 2008

### HR Mass spectra of Compounds 10e

S83

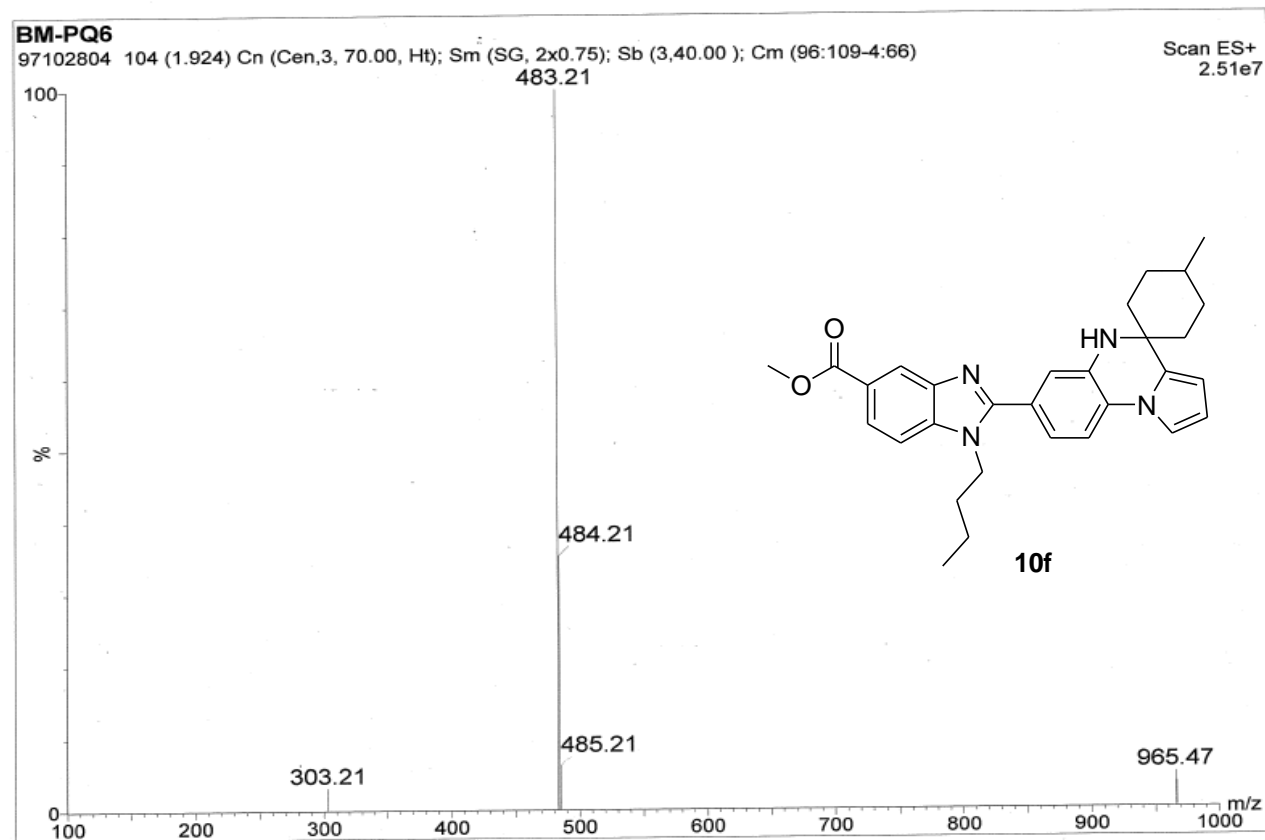

### LR Mass spectra of Compounds 10f

S84

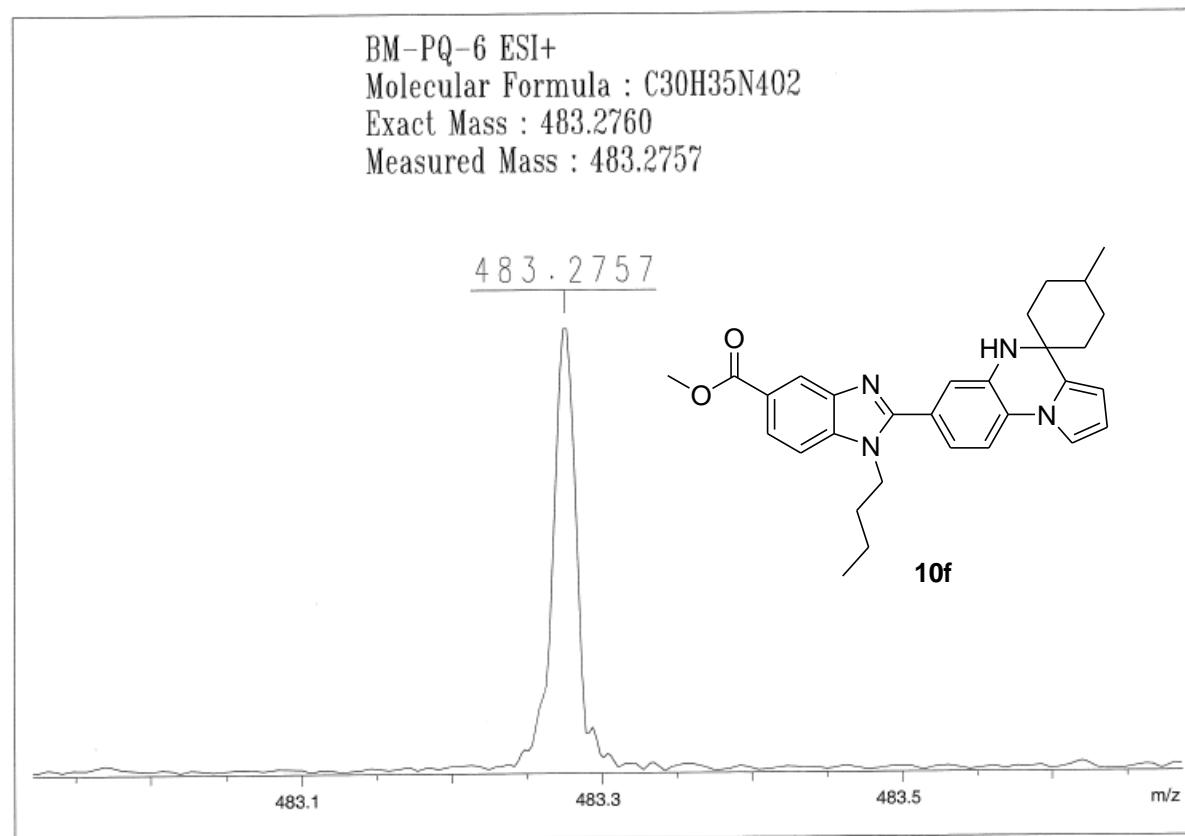

/d=/Data/yu/bmpq6/2/pdata/1 Administrator Wed Nov 19 14:34:37 2008

### HR Mass spectra of Compounds 10f

S85

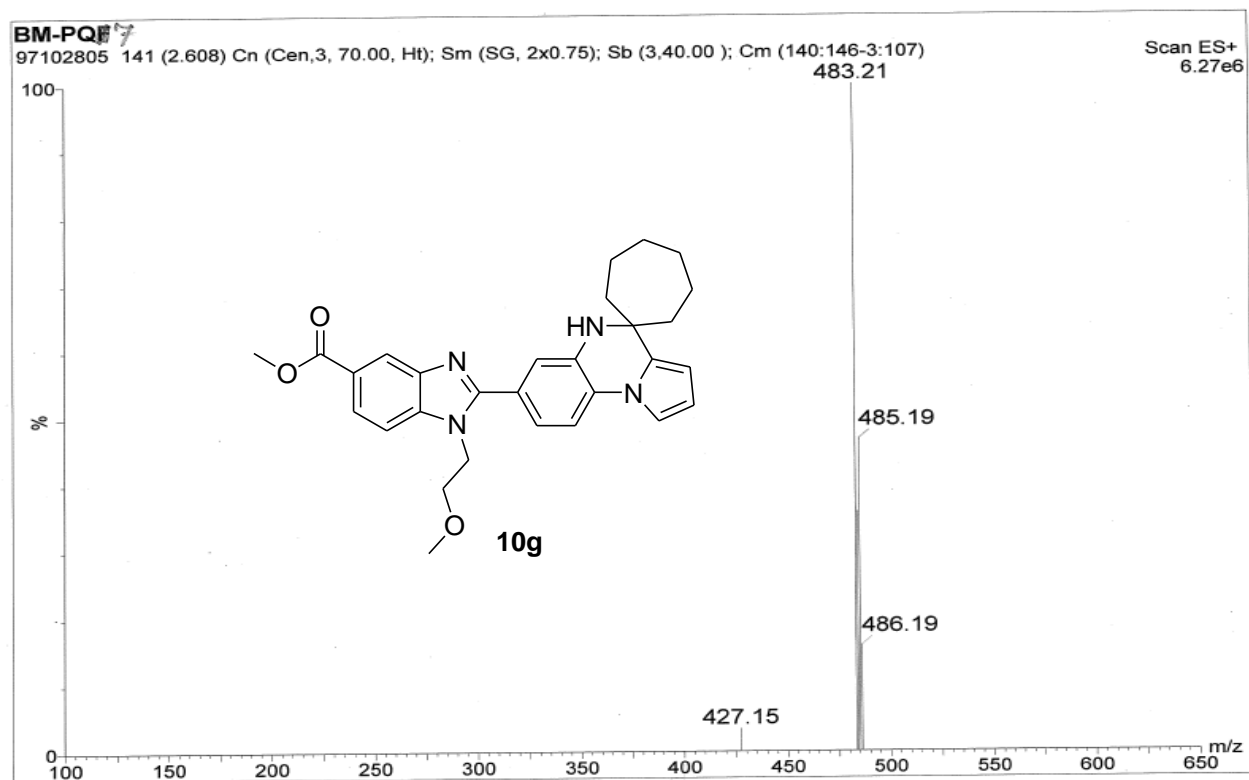

LR Mass spectra of Compounds 10g

S86

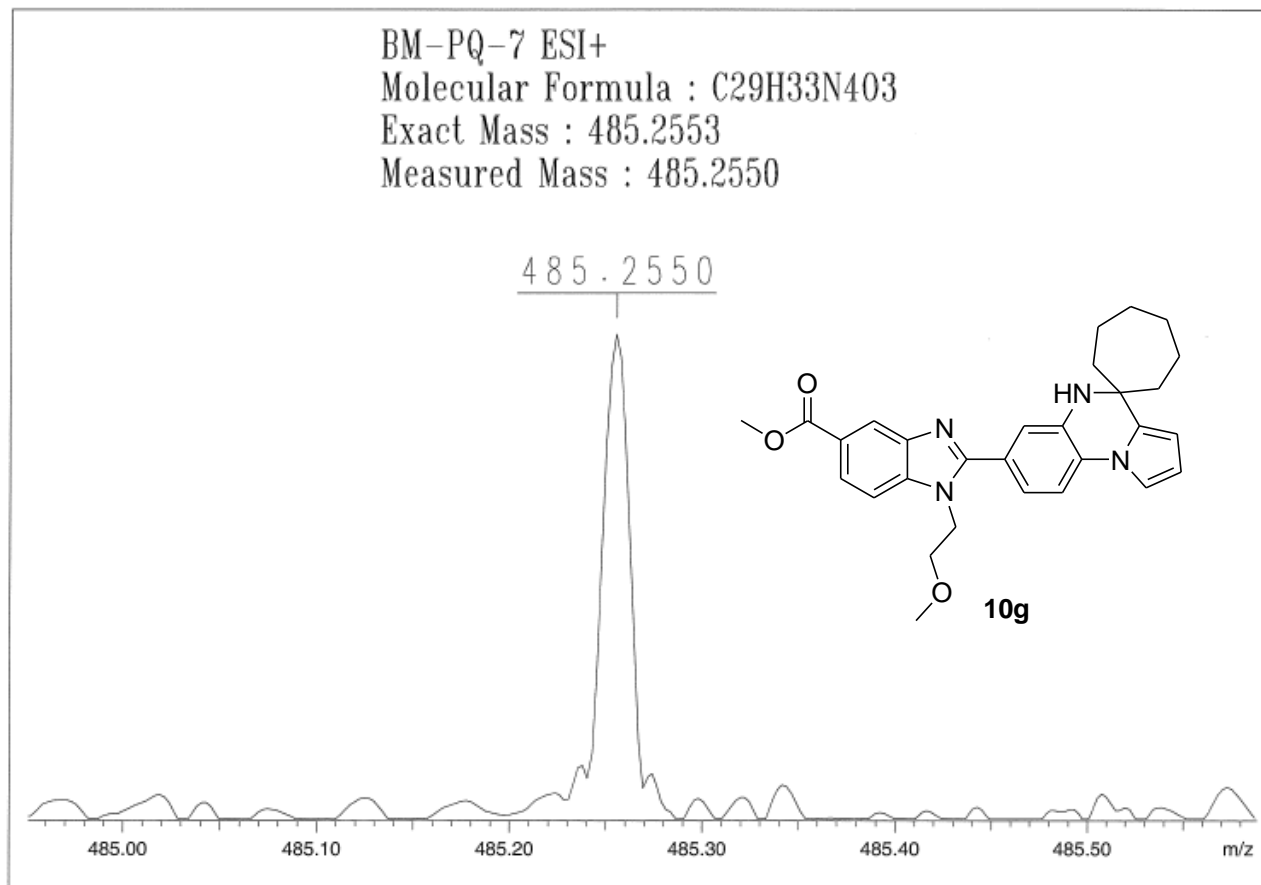

/d=/Data/ylu/bmpq7/1/pdata/1 Administrator Wed Nov 19 14:43:00 2008

### HR Mass spectra of Compounds 10g

S87



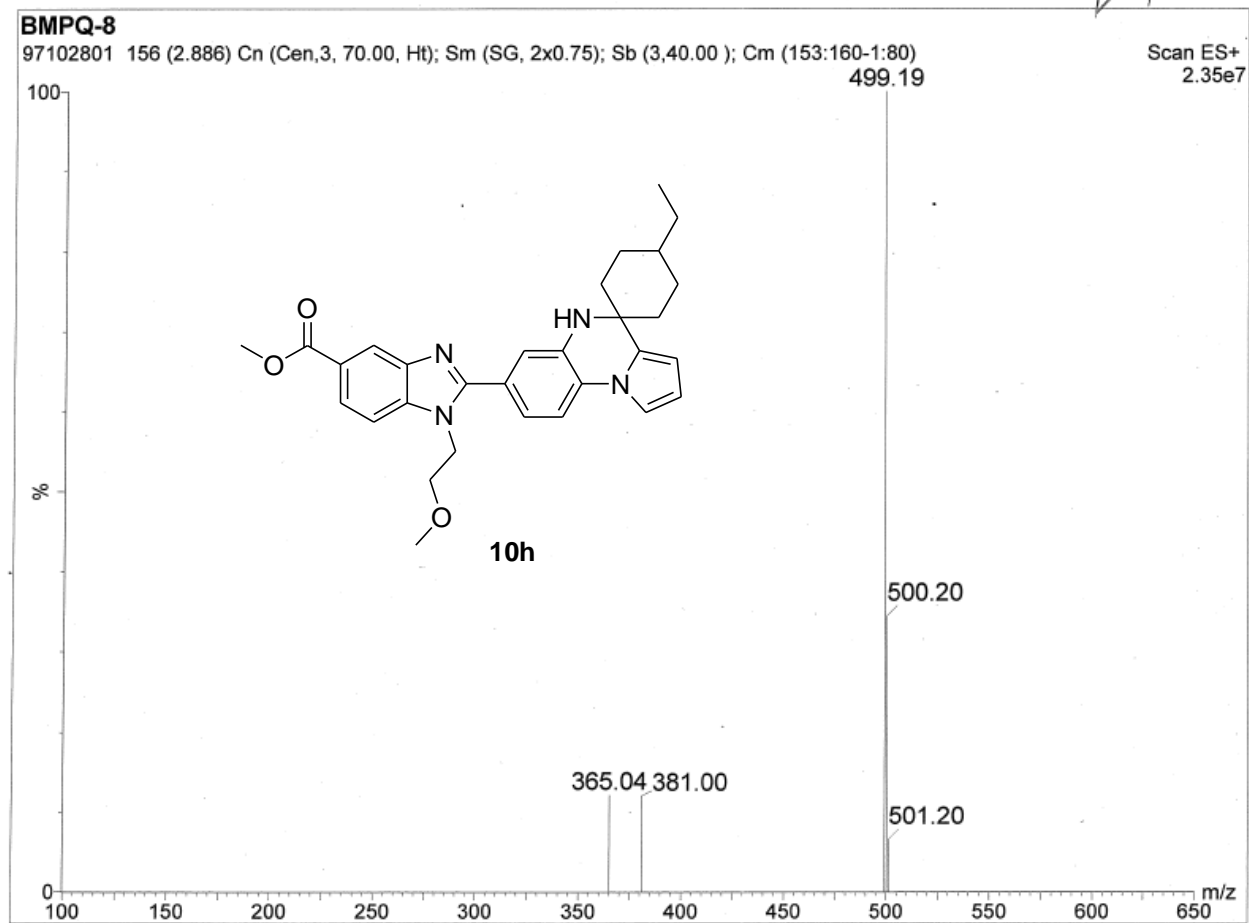

**LR Mass spectra of Compounds 10h**

S88

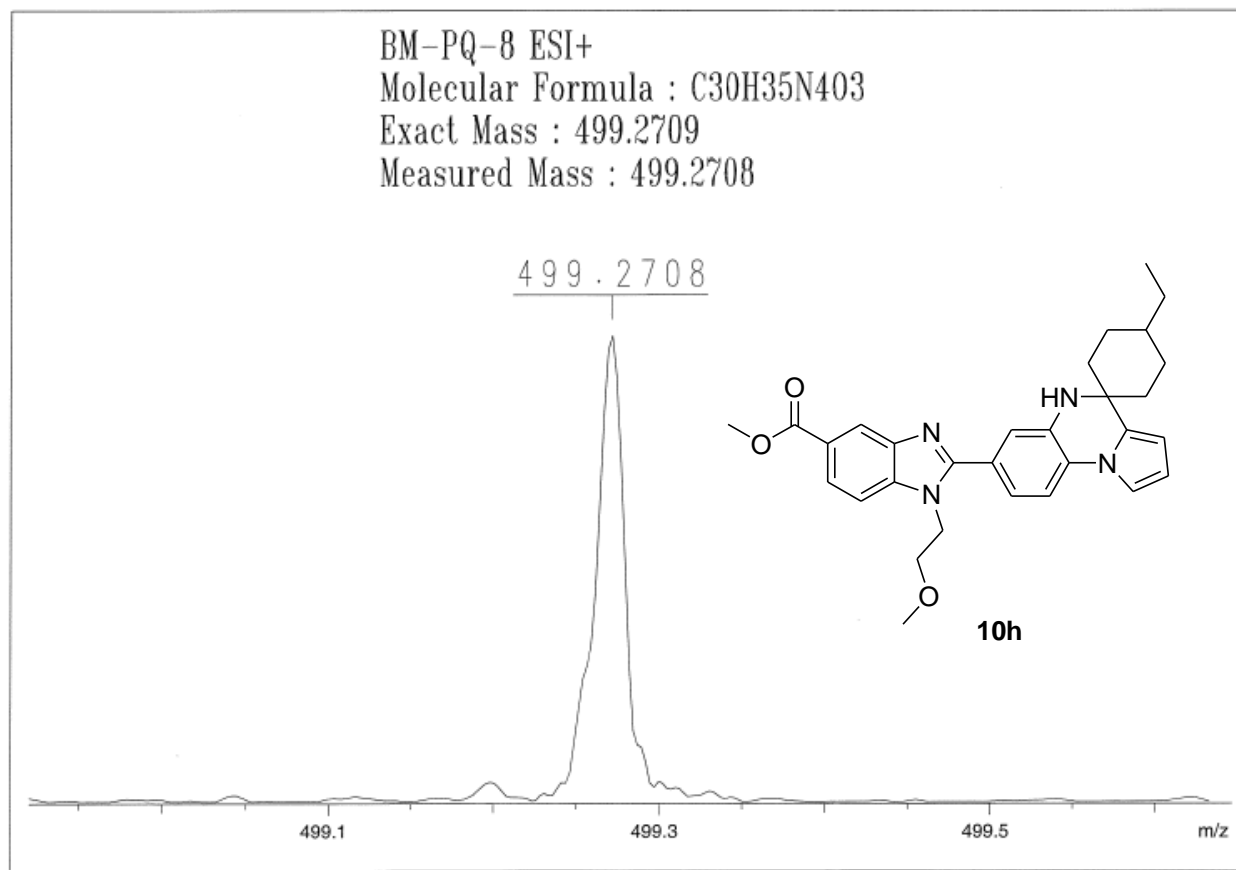

/d=/Data/yu/bmpq8/1/pdata/1 Administrator Wed Nov 19 14:47:51 2008

### HR Mass spectra of Compounds 10h

S89

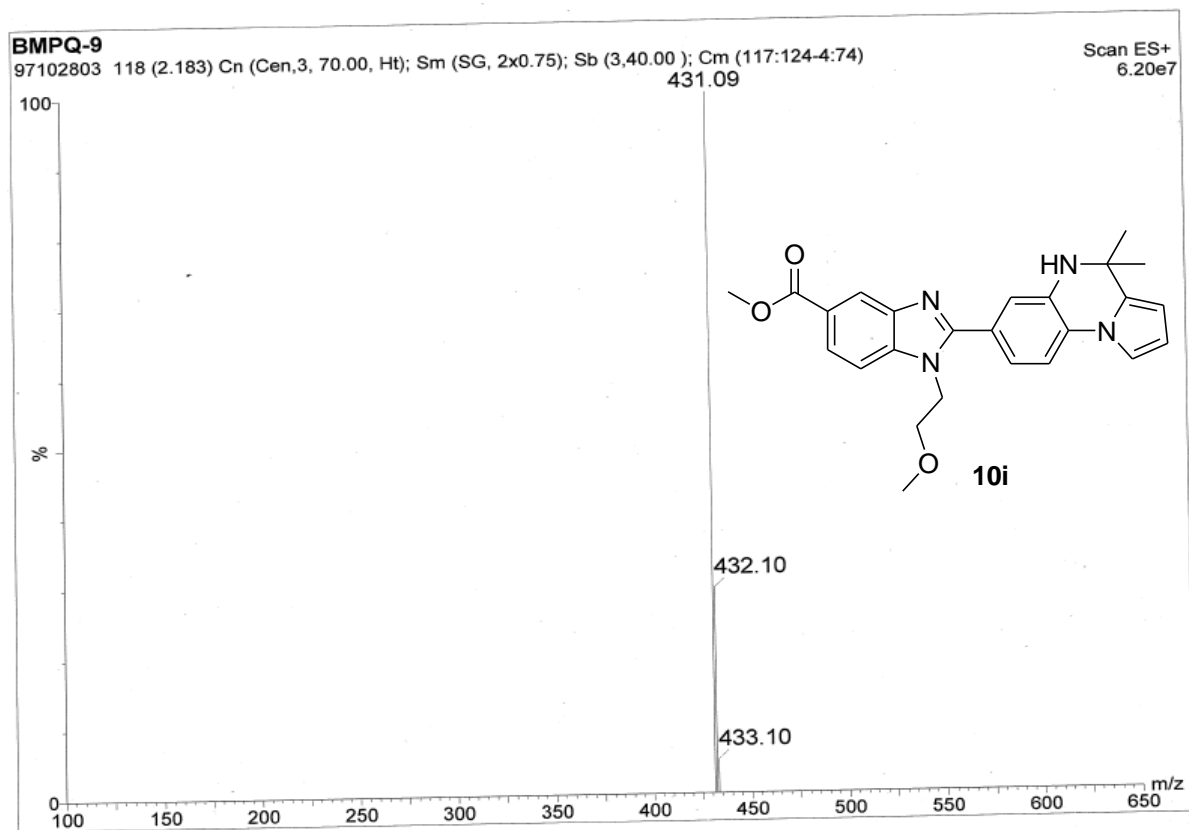

### LR Mass spectra of Compounds 10i

S90

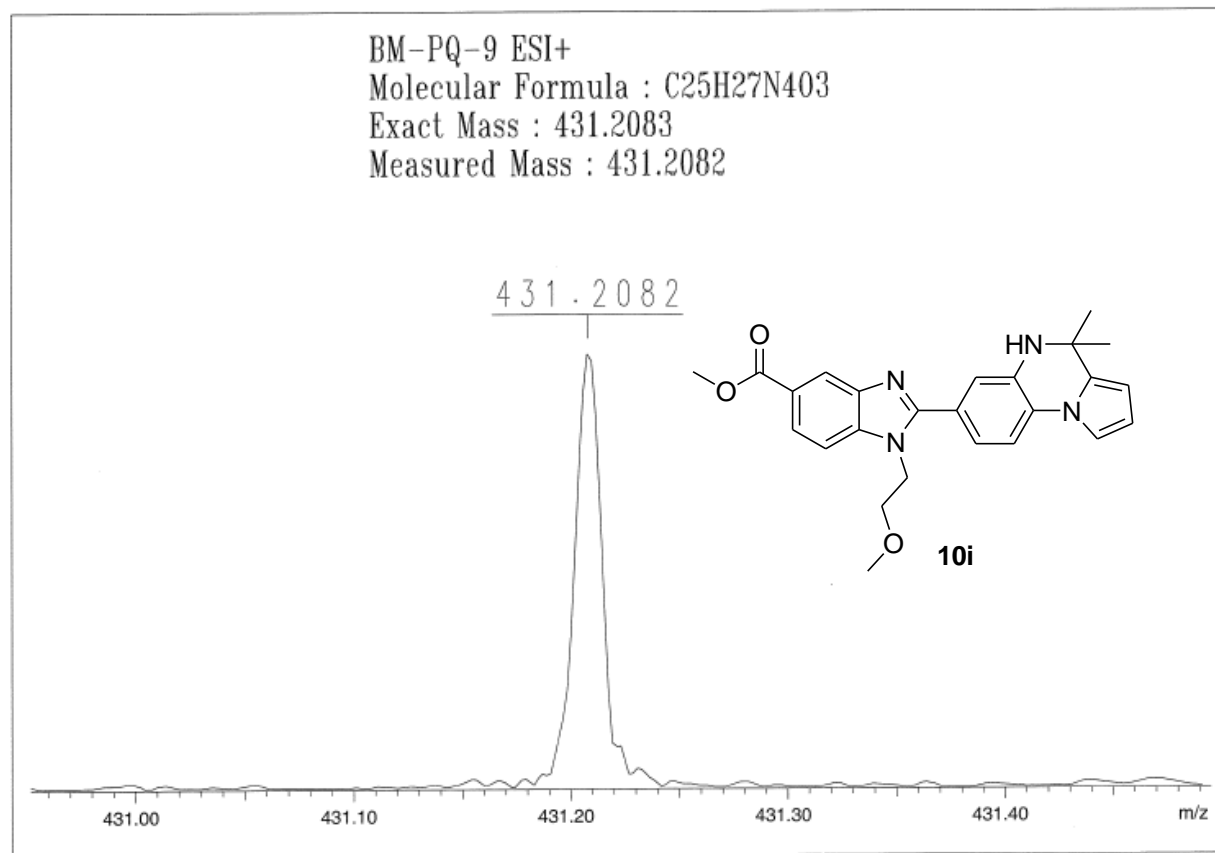

/d=/Data/you/bmpq9/1/pdata/1 Administrator Wed Nov 19 14:53:49 2008

## HR Mass spectra of Compounds 10i

S91

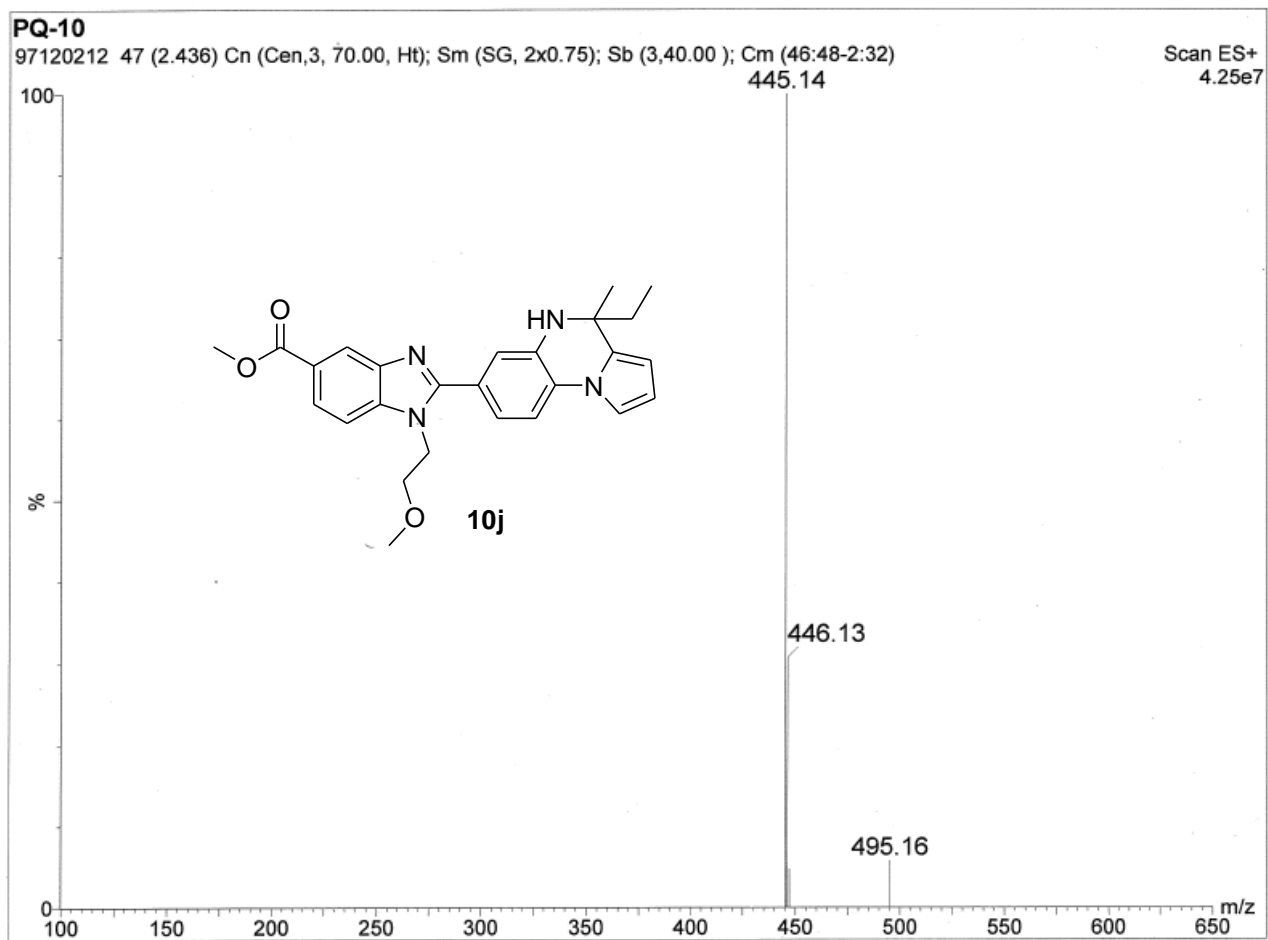

### LR Mass spectra of Compounds 10j

S92

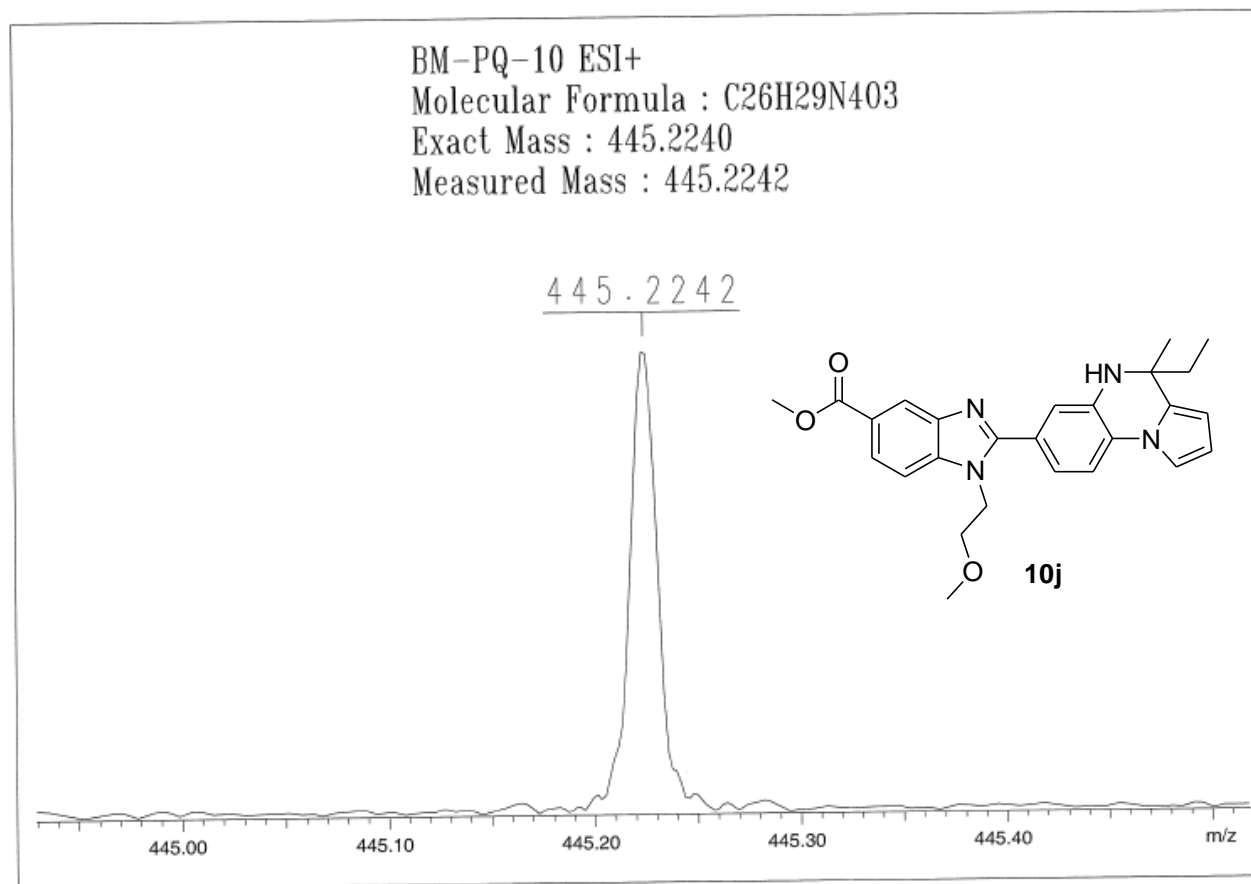

/d=/Data/yy/bmpq10/4/pdata/1 Administrator Wed Nov 19 15:05:56 2008

### HR Mass spectra of Compounds 10j

S93

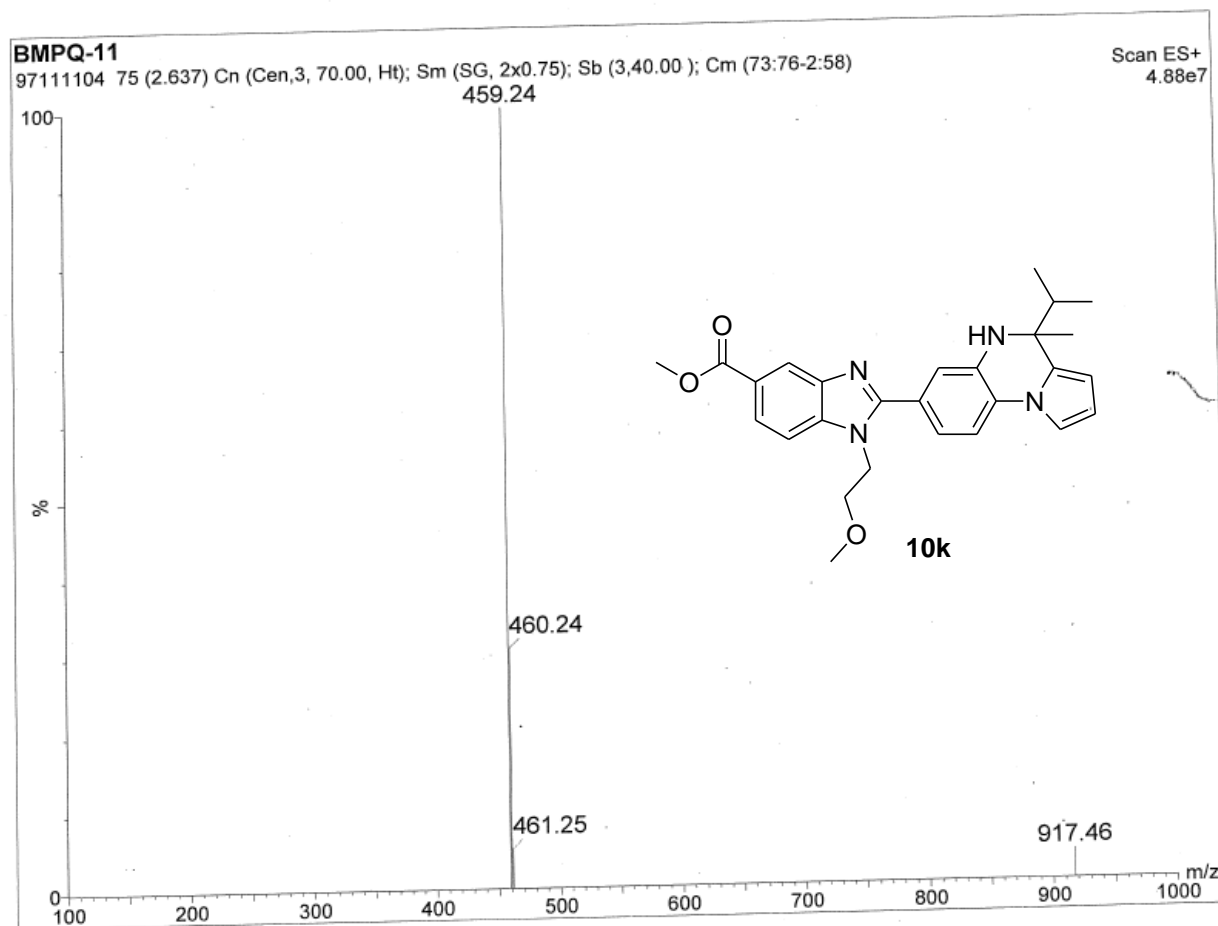

**LR Mass spectra of Compounds 10k**

S94

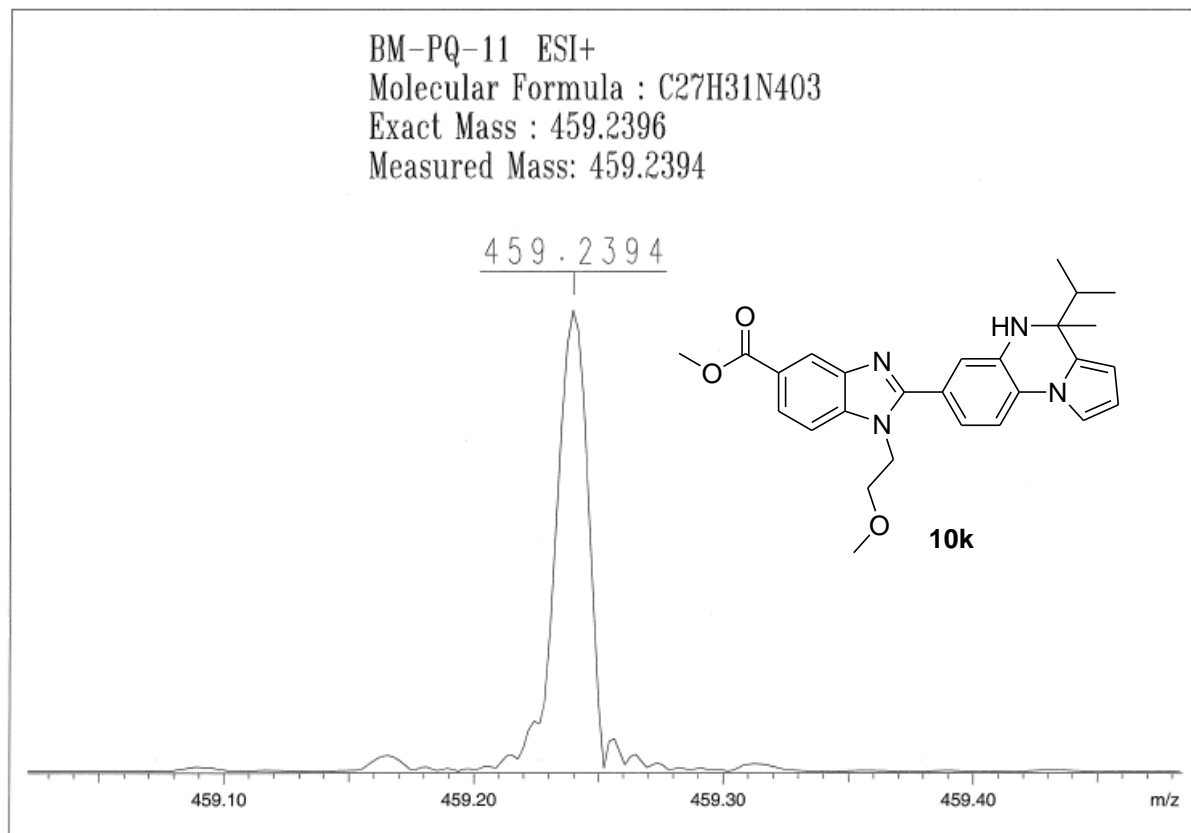

/d=/Data/yu/bmpq11/1/pdata/1 Administrator Thu Jan 15 13:09:25 2009

## HR Mass spectra of Compounds 10k

S95



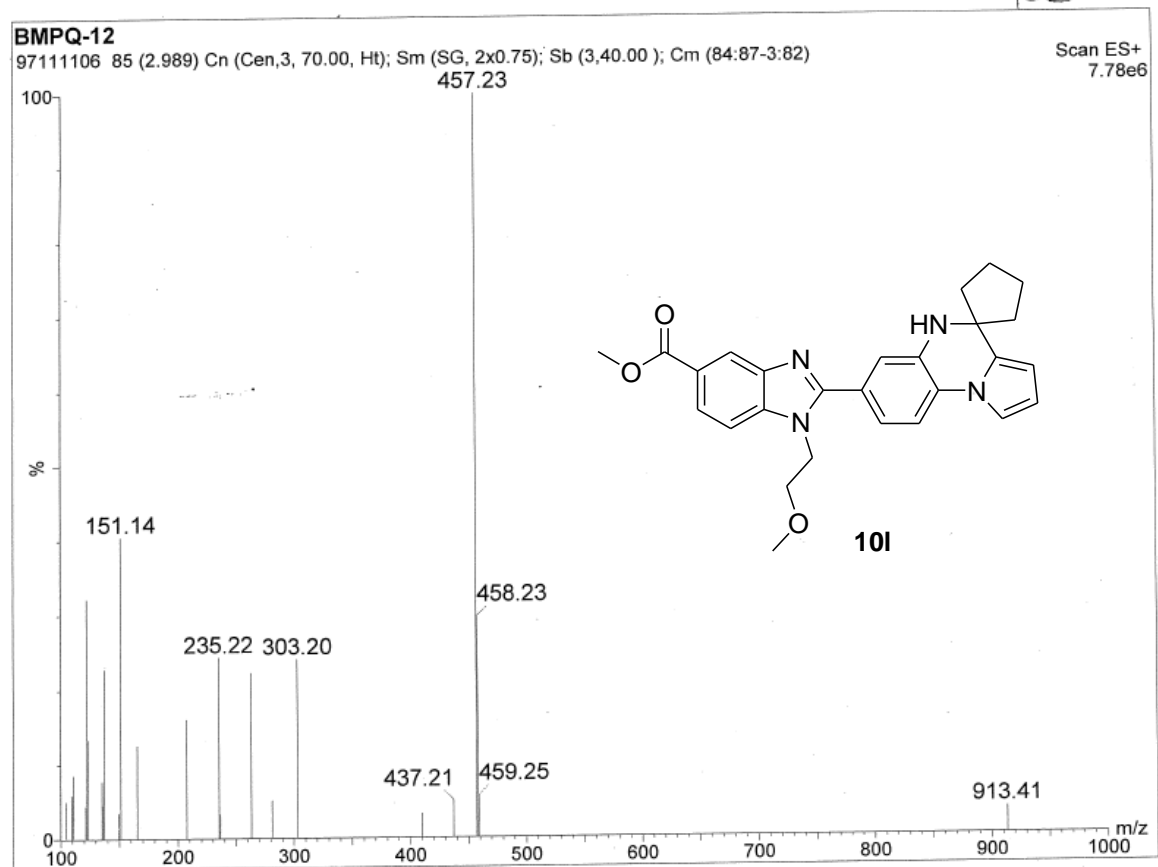

**LR Mass spectra of Compounds 10I**

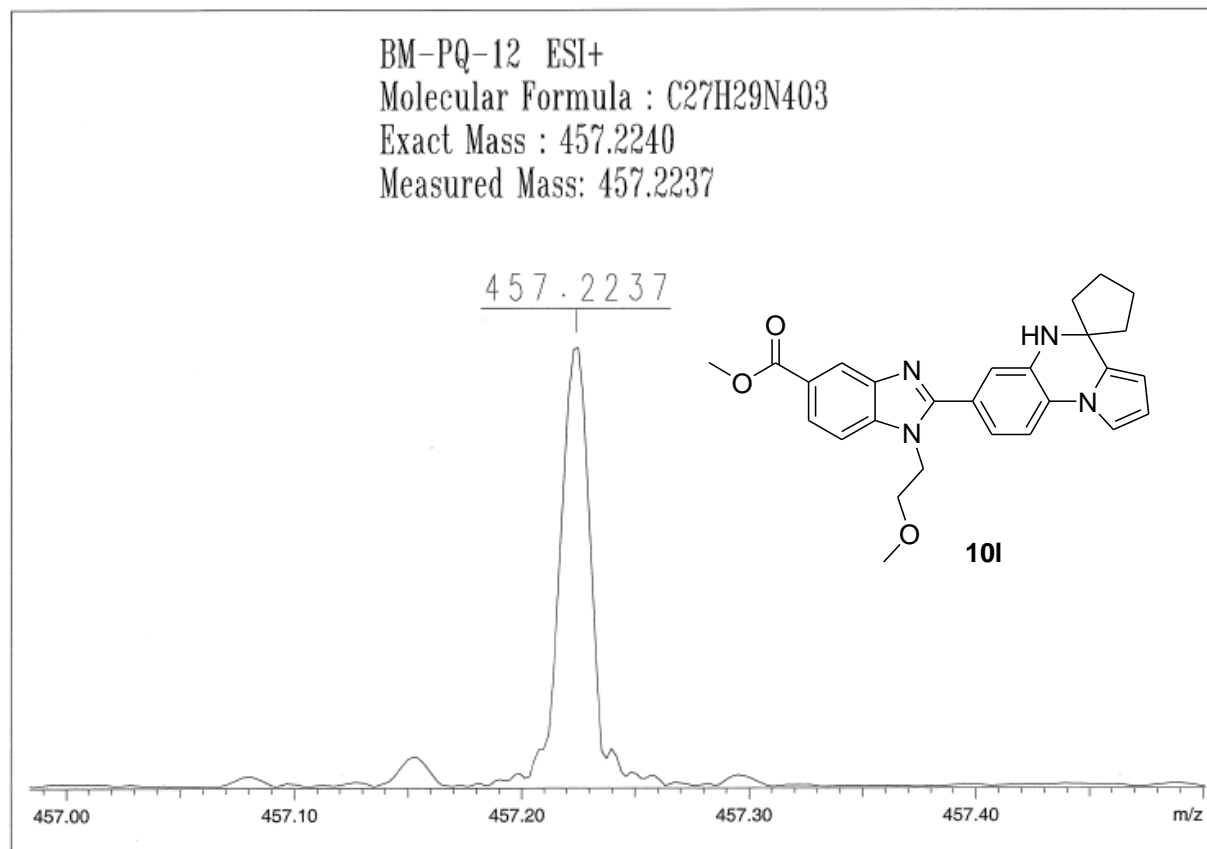

/d=/Data/yu/bmpq12/1/pdata/1 Administrator Thu Jan 15 13:16:08 2009

### HR Mass spectra of Compounds 10I

S97

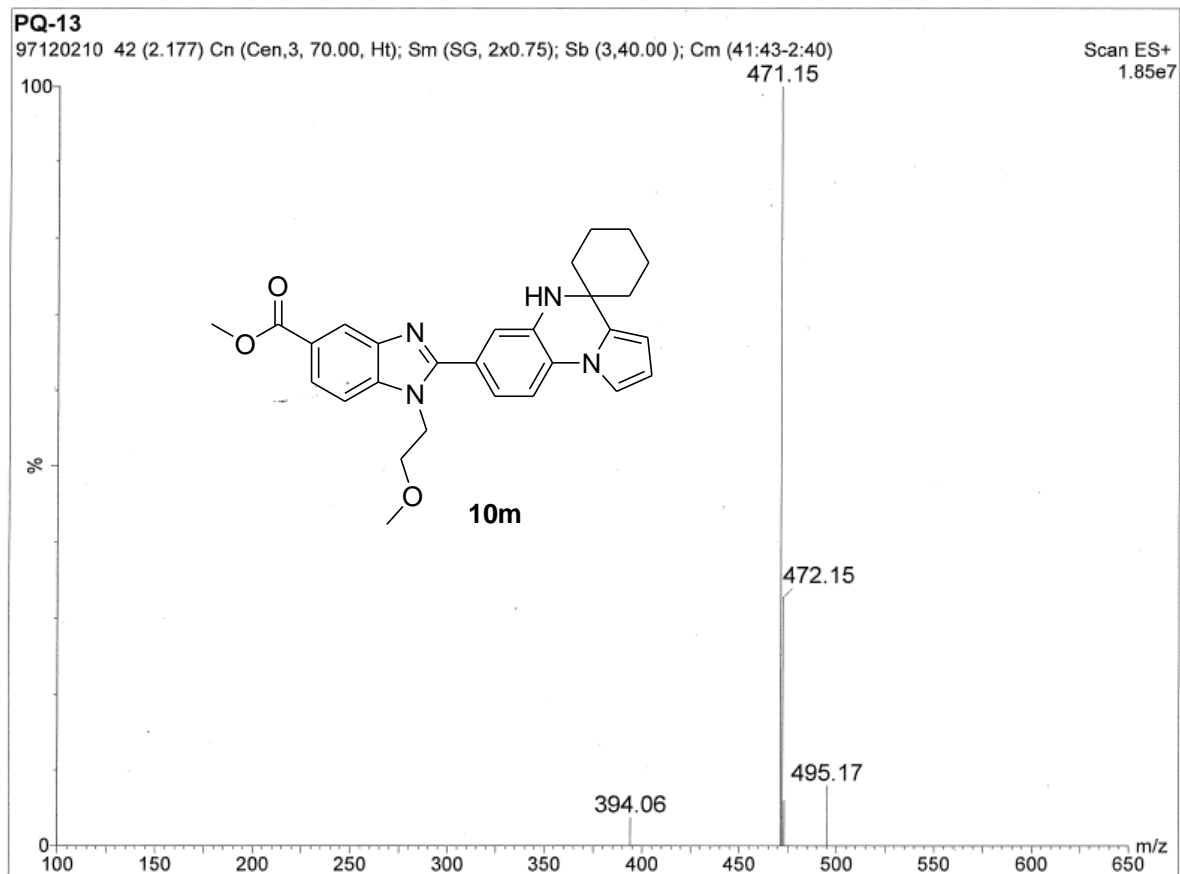

### LR Mass spectra of Compounds 10m

S98

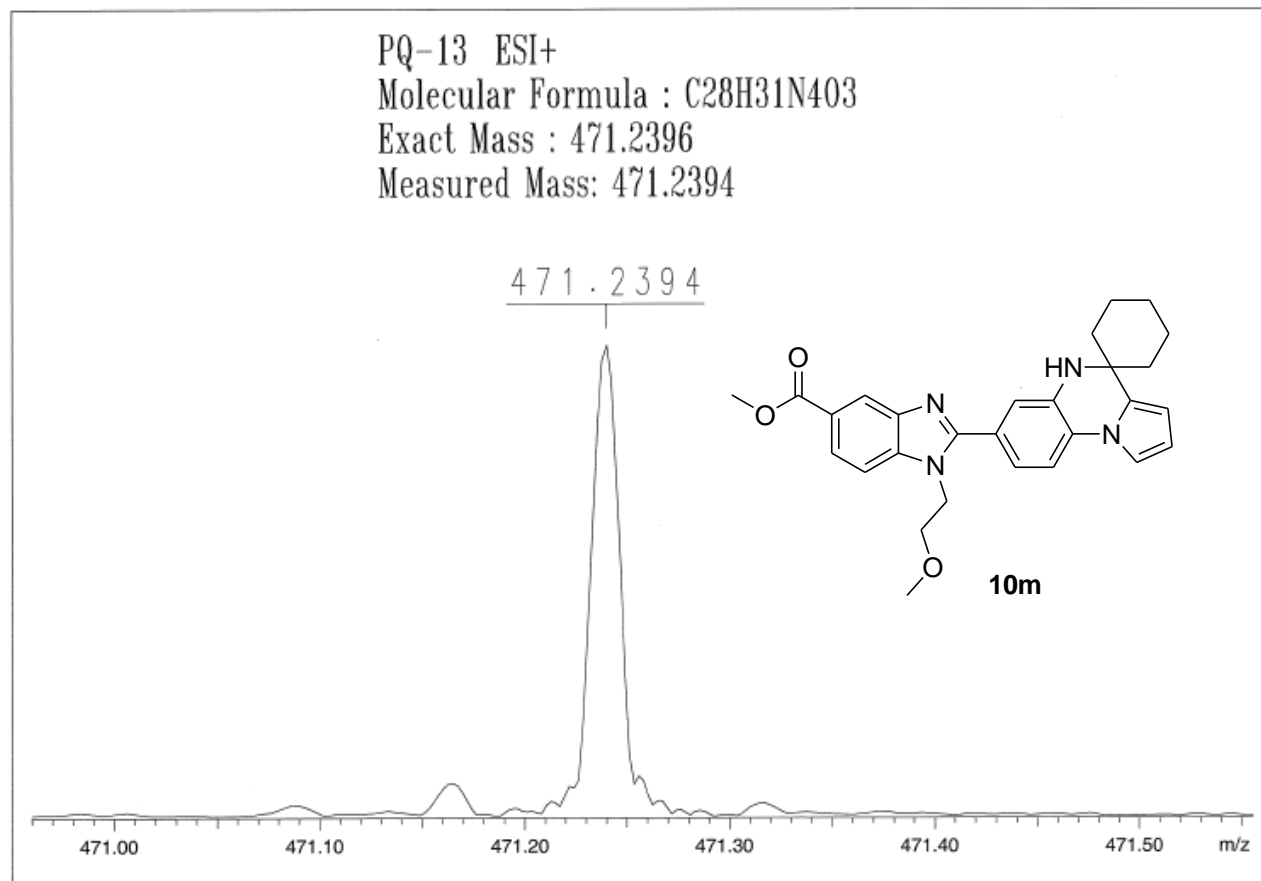

/d=/Data/yu/pq13/1/pdata/1 Administrator Thu Jan 15 13:26:00 2009

### HR Mass spectra of Compounds 10m

S99

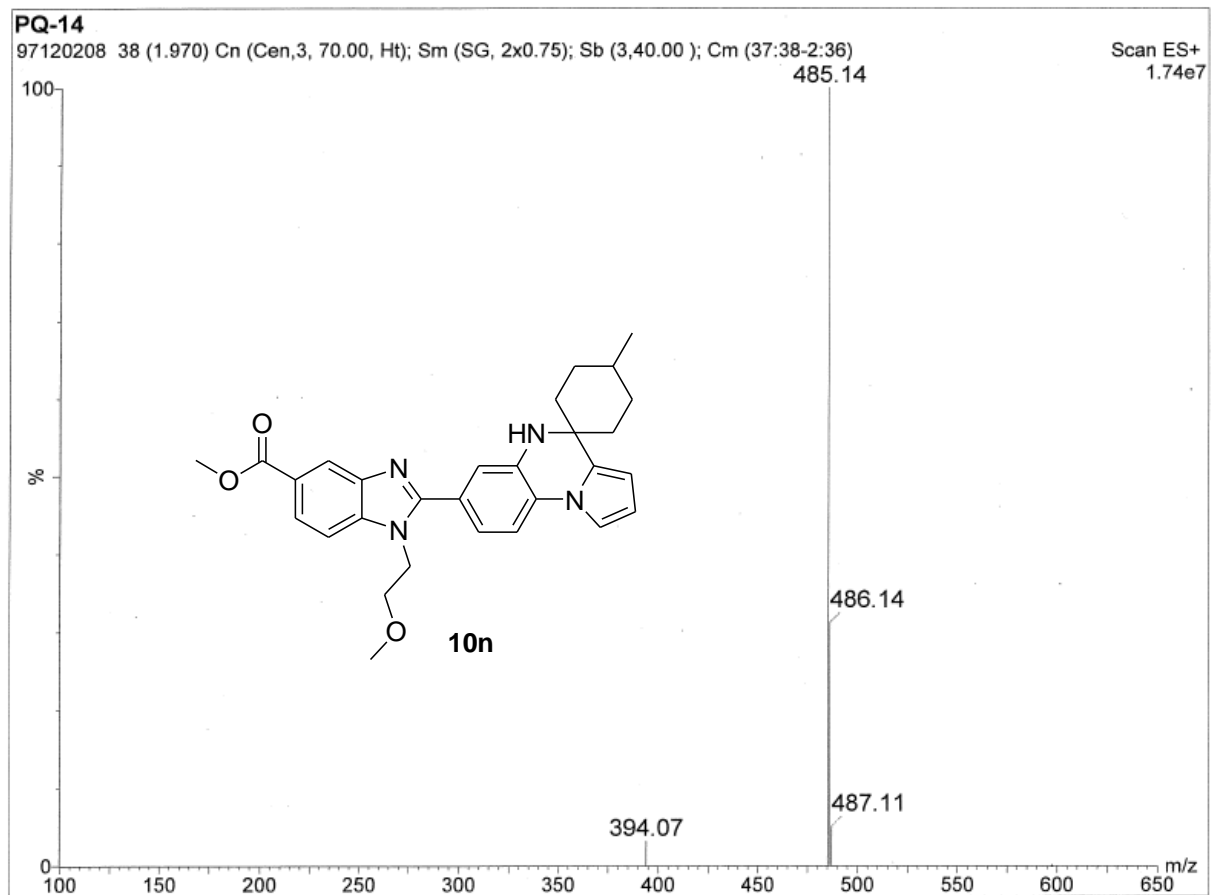

### LR Mass spectra of Compounds 10n

S100

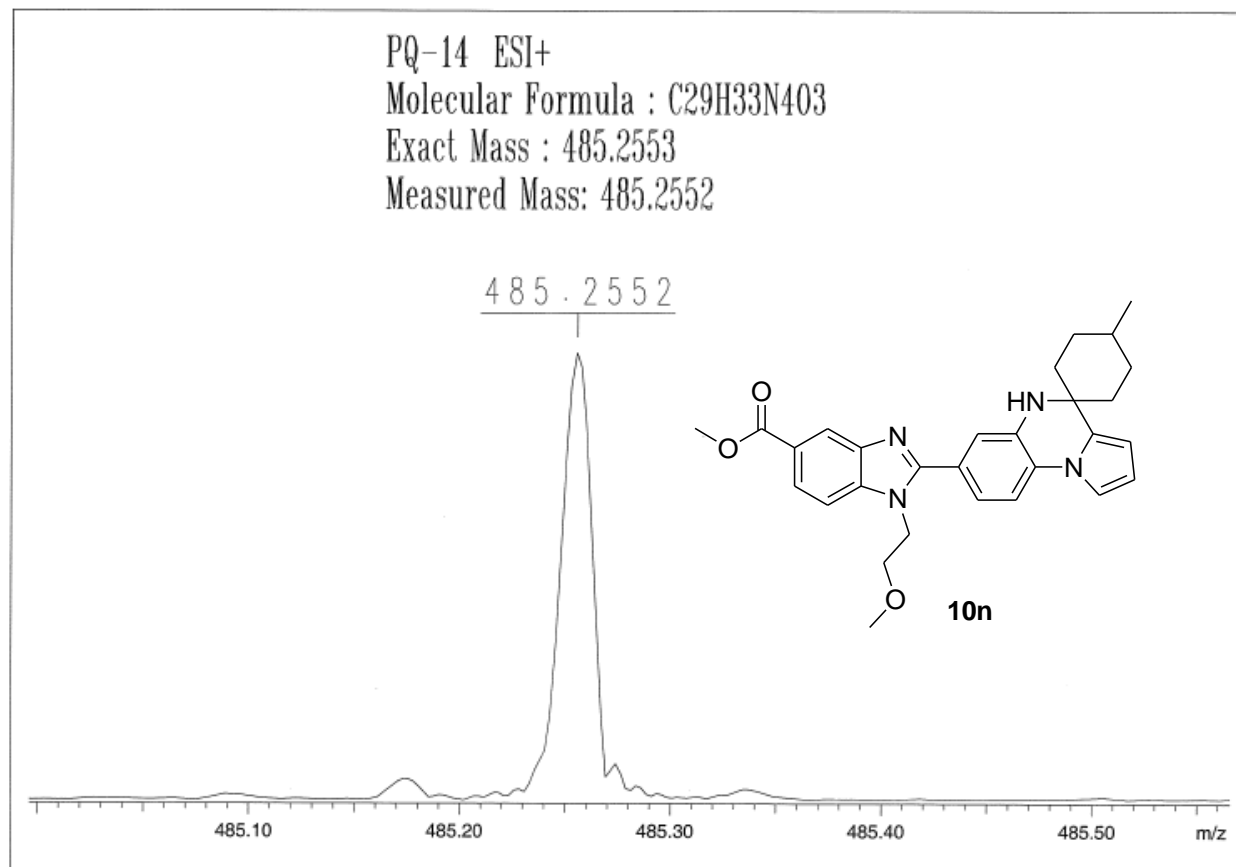

/d=/Data/yy/pq14/1/pdata/1 Administrator Thu Jan 15 13:30:17 2009

### HR Mass spectra of Compounds 10n

S101

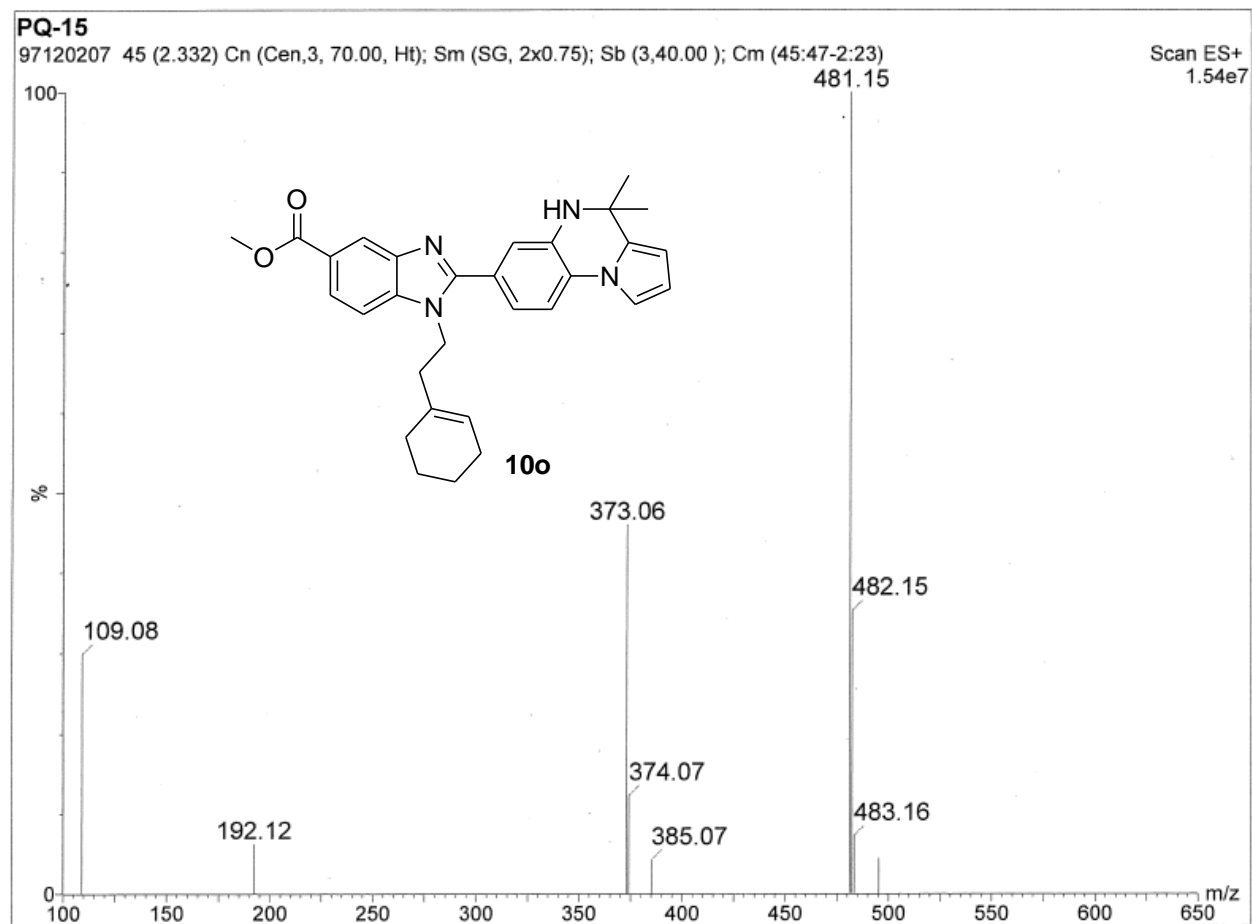

### LR Mass spectra of Compounds 10o

S102

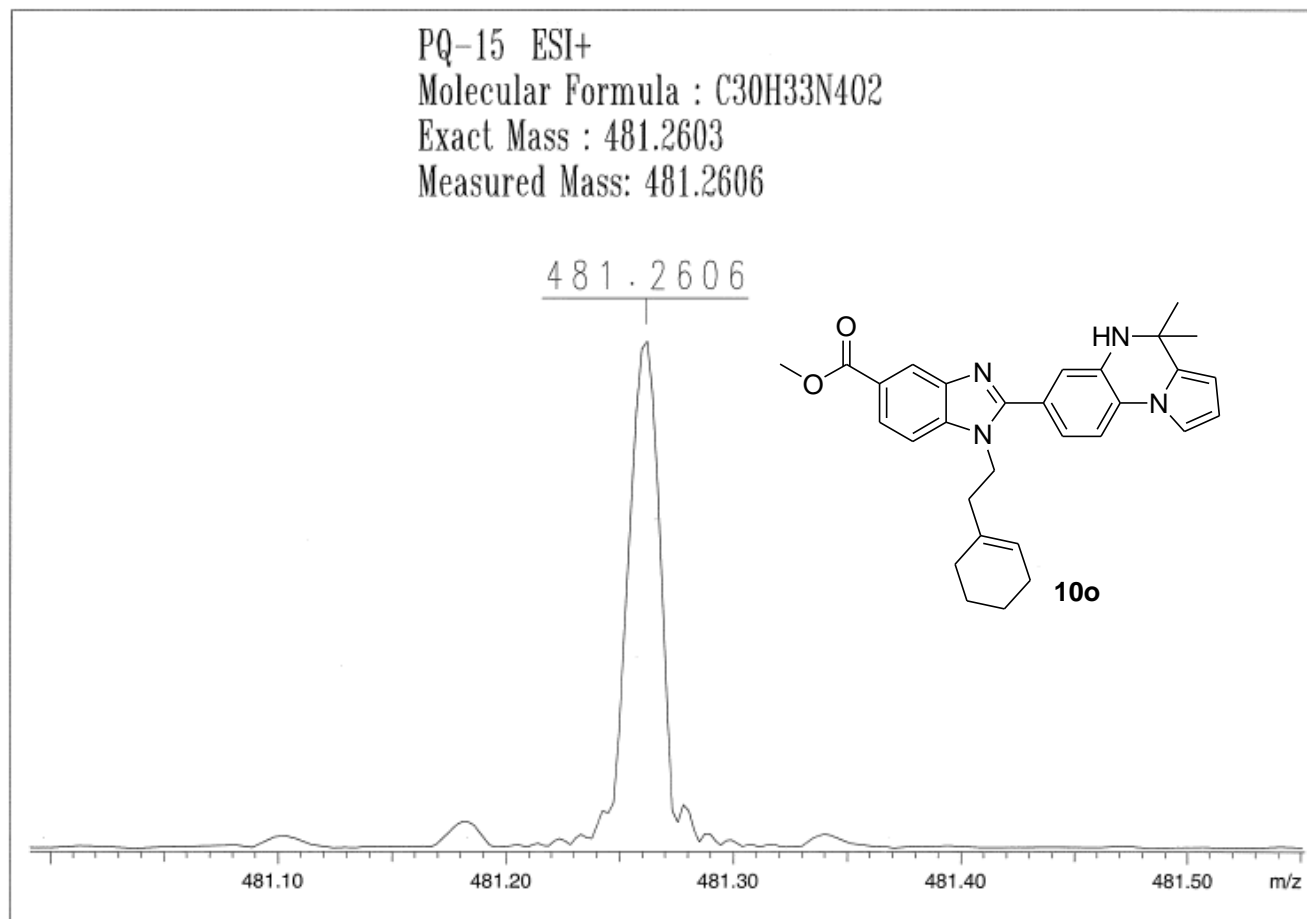

/d=/Data/yl/pq15/1/pdata/1 Administrator Thu Jan 15 13:35:46 2009

**HR Mass spectra of Compounds 10o**



S103

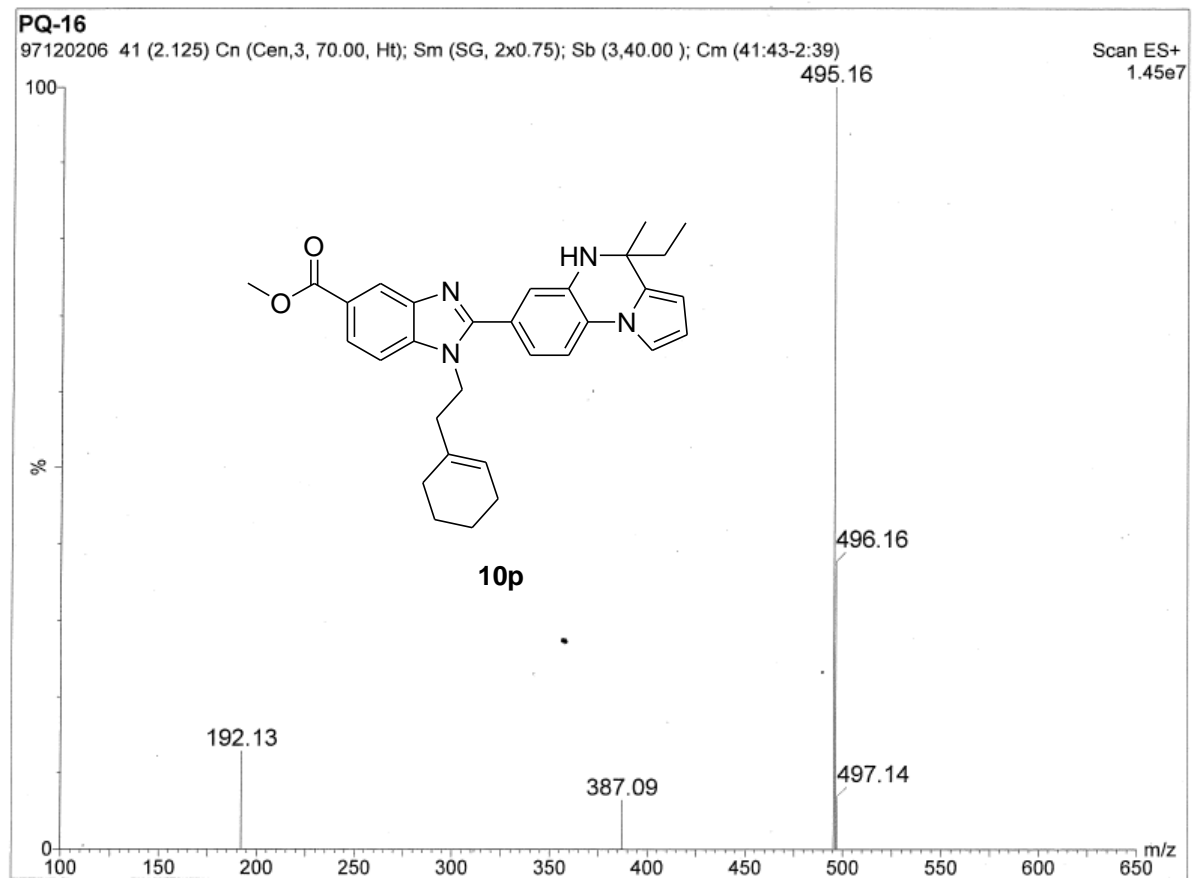

**LR Mass spectra of Compounds 10p**

S104

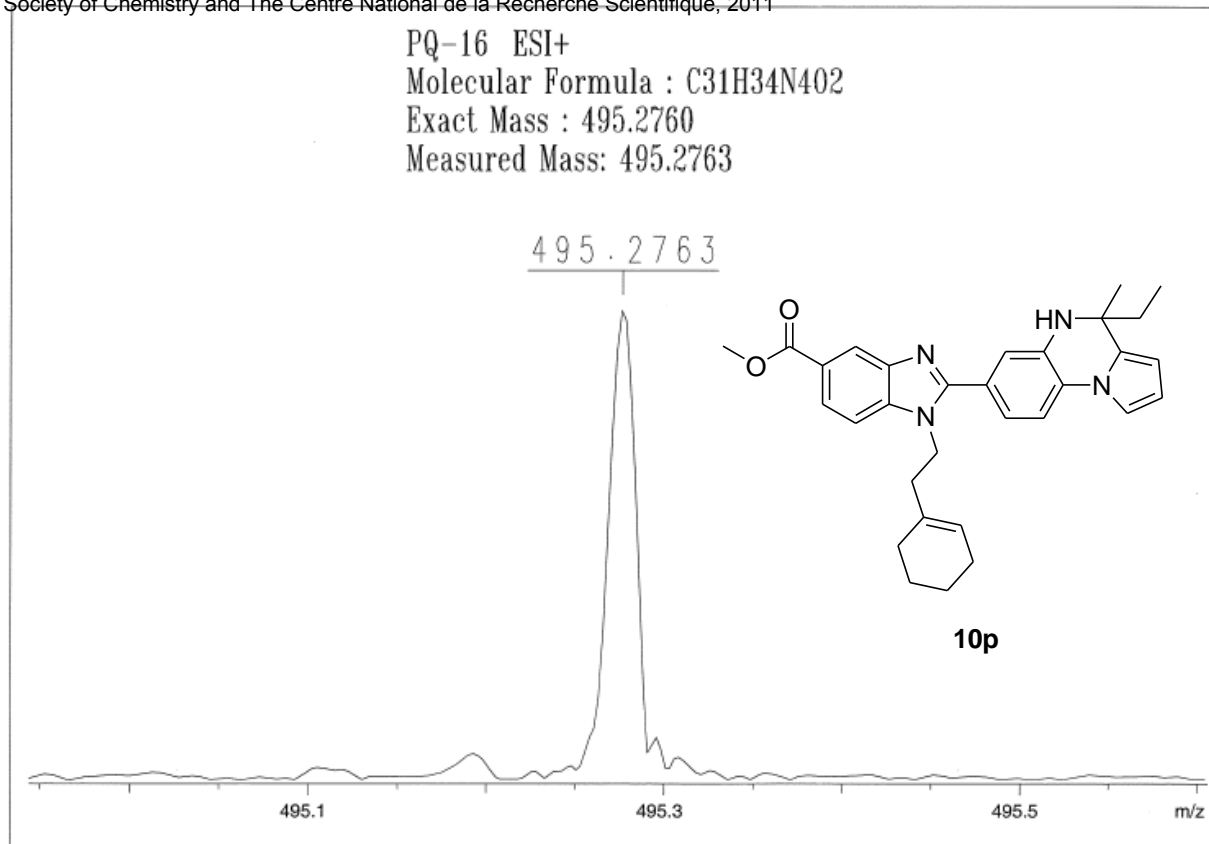

/d=/Data/yu/pq16/1/pdata/1 Administrator Thu Jan 15 13:41:36 2009

### HR Mass spectra of Compounds 10p

S105

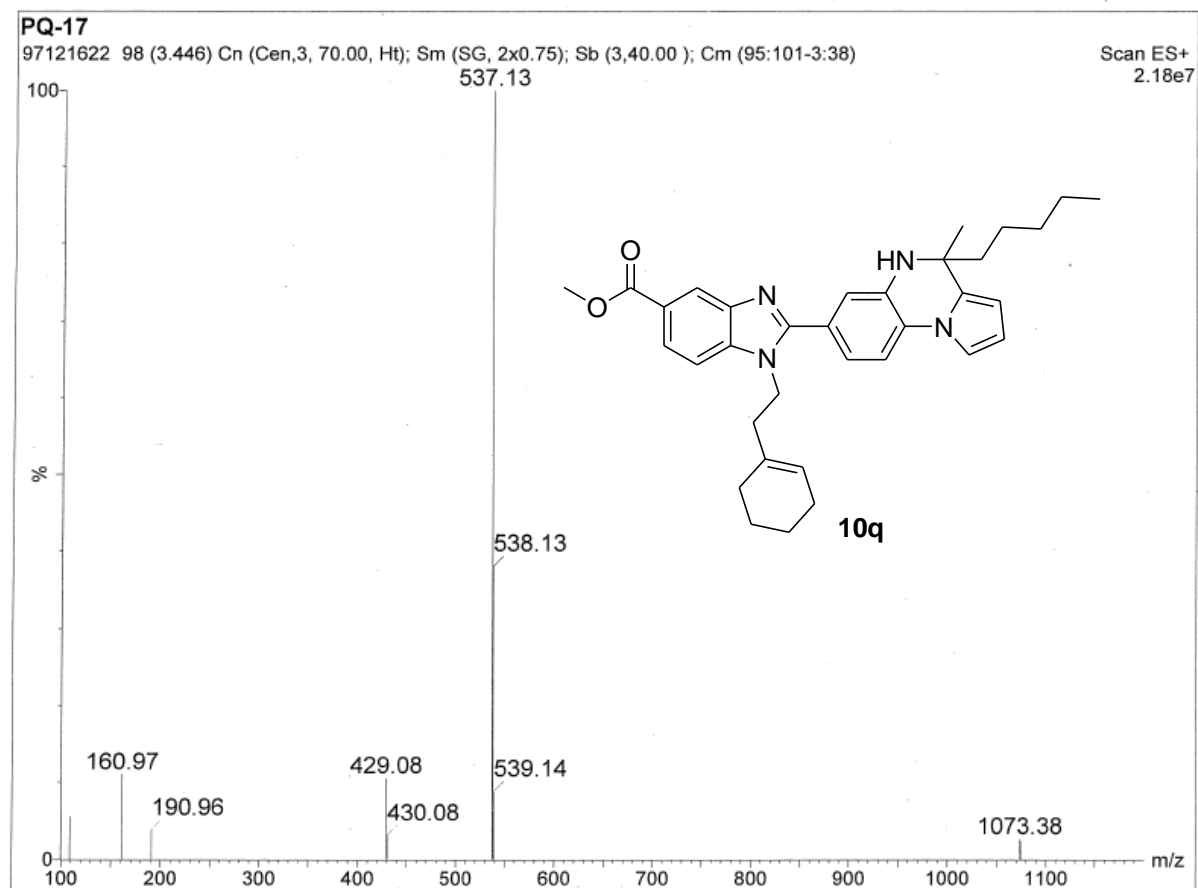

**LR Mass spectra of Compounds 10q**  
S106

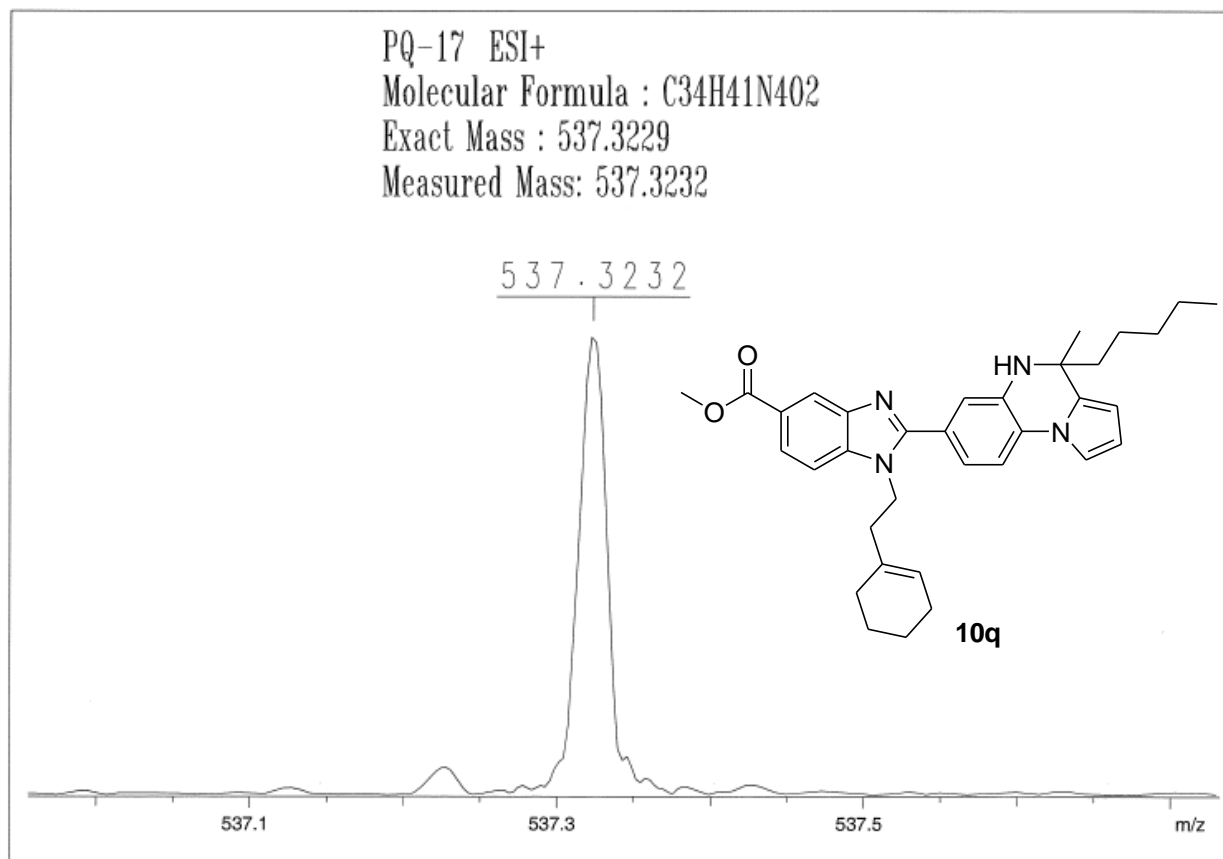

/d=/Data/yl/pq17/1/pdata/1 Administrator Thu Jan 15 13:49:32 2009

### HR Mass spectra of Compounds 10q

S107

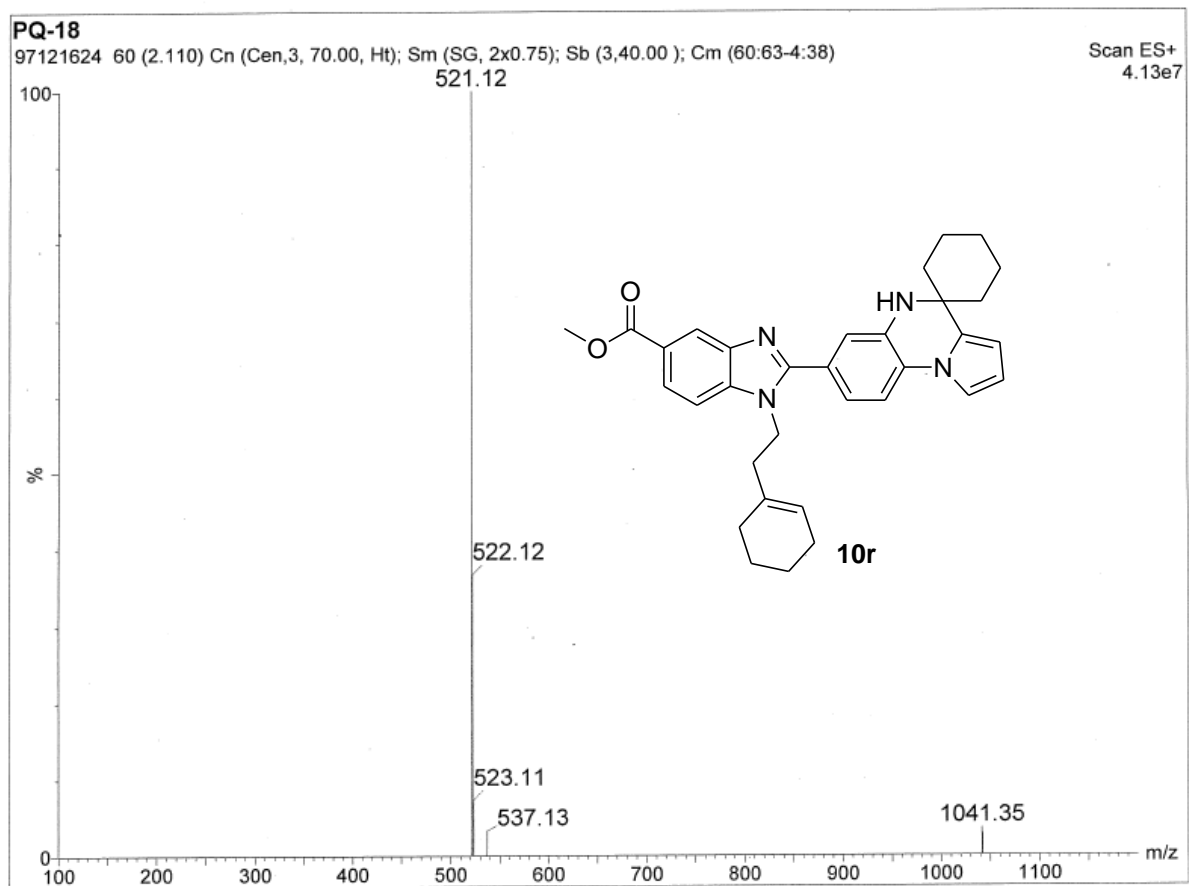

### LR Mass spectra of Compounds 10r

S108

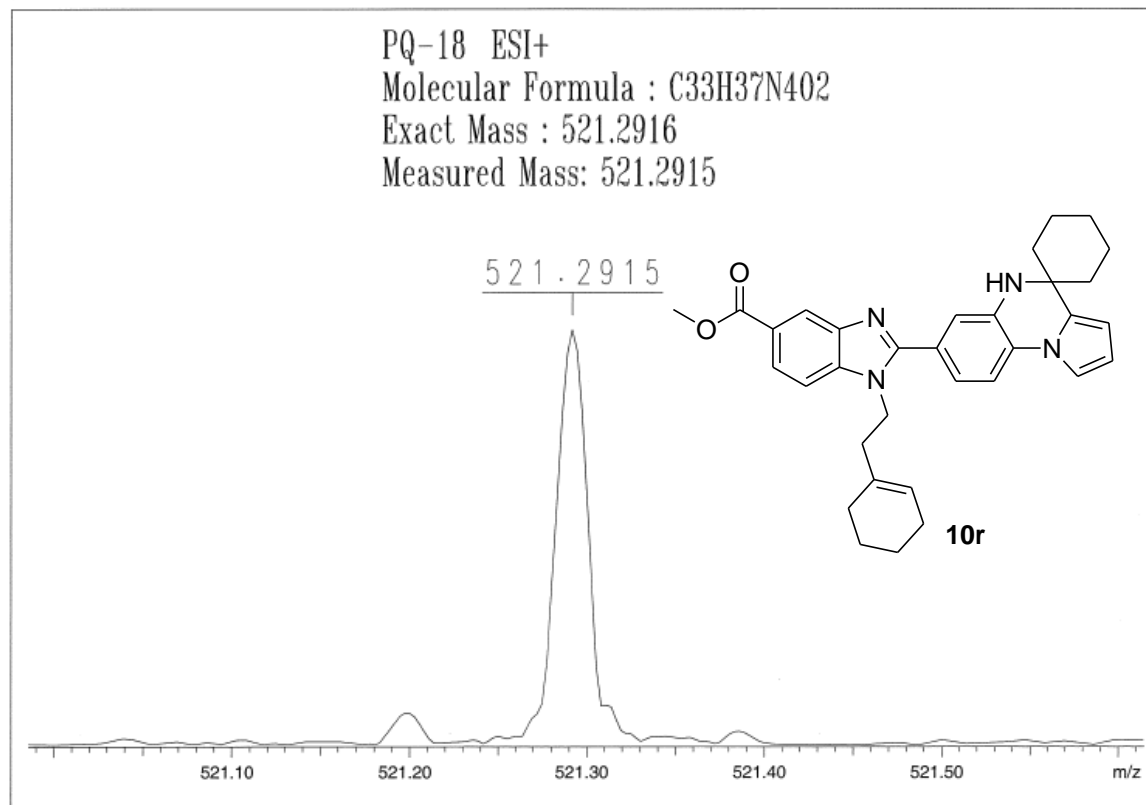

/d=/Data/yu/pq18/1/pdata/1 Administrator Thu Jan 15 13:56:07 2009

### HR Mass spectra of Compounds 10r

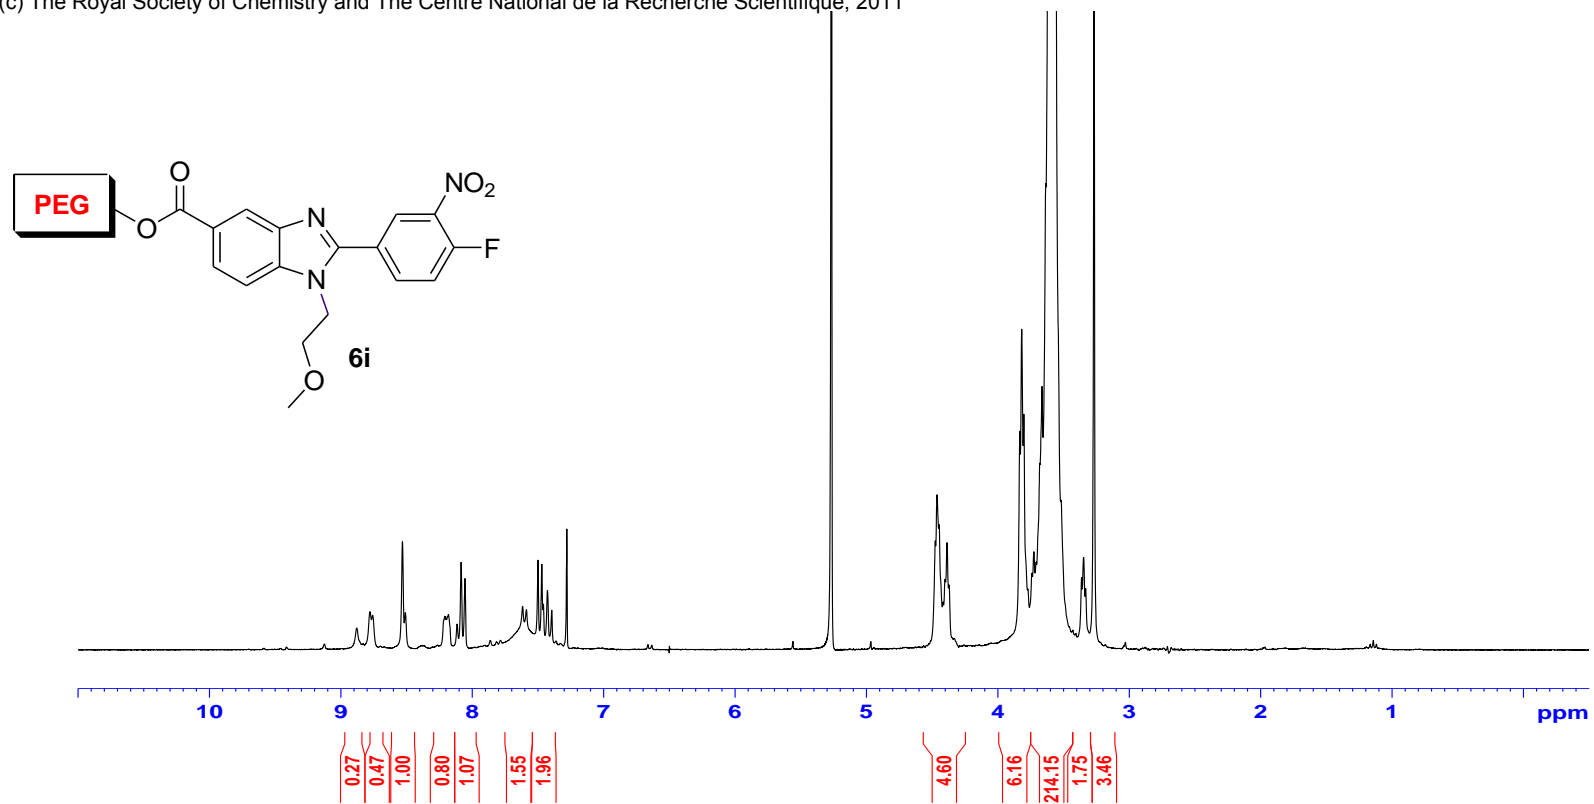

$^1\text{H NMR}$  spectrum (300 MHz) of intermediate compound **6i** in  $\text{CDCl}_3$

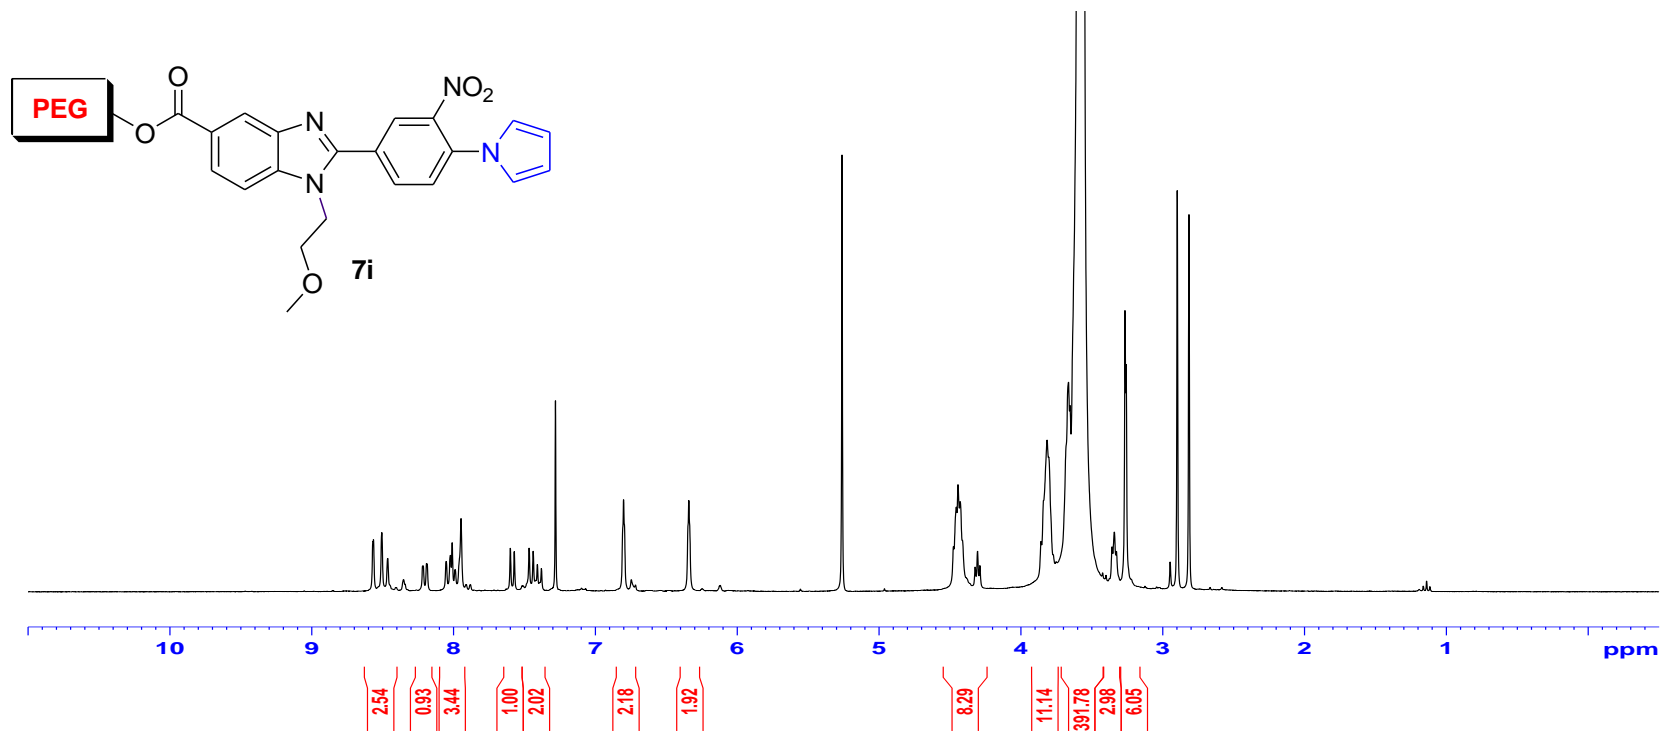

<sup>1</sup>H NMR spectrum (300 MHz) of intermediate compound 7i in CDCl<sub>3</sub>



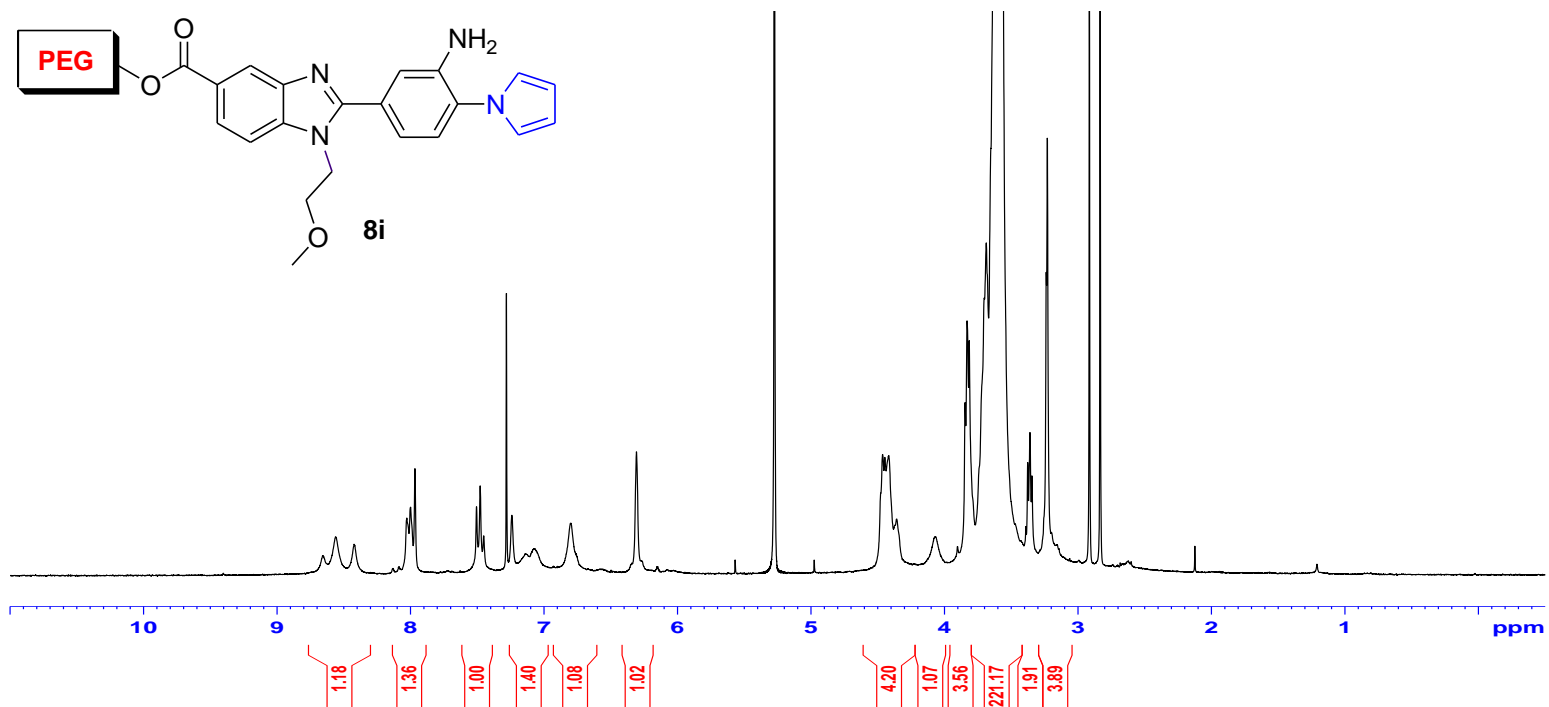

$^1\text{H}$ NMR spectrum (300 MHz) of intermediate compound **8i** in  $\text{CDCl}_3$

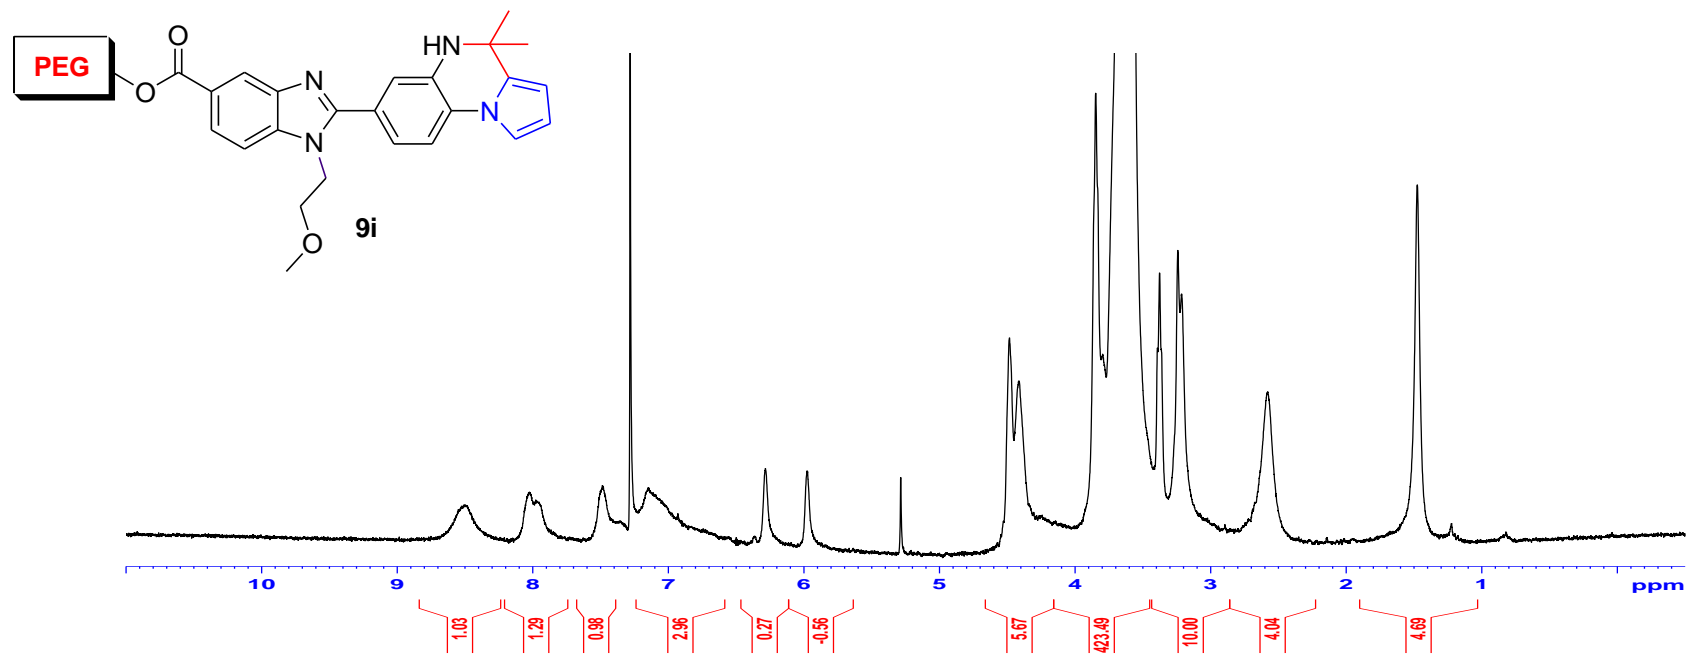

**<sup>1</sup>H NMR spectrum (300 MHz) of intermediate compound 9i in CDCl<sub>3</sub>**

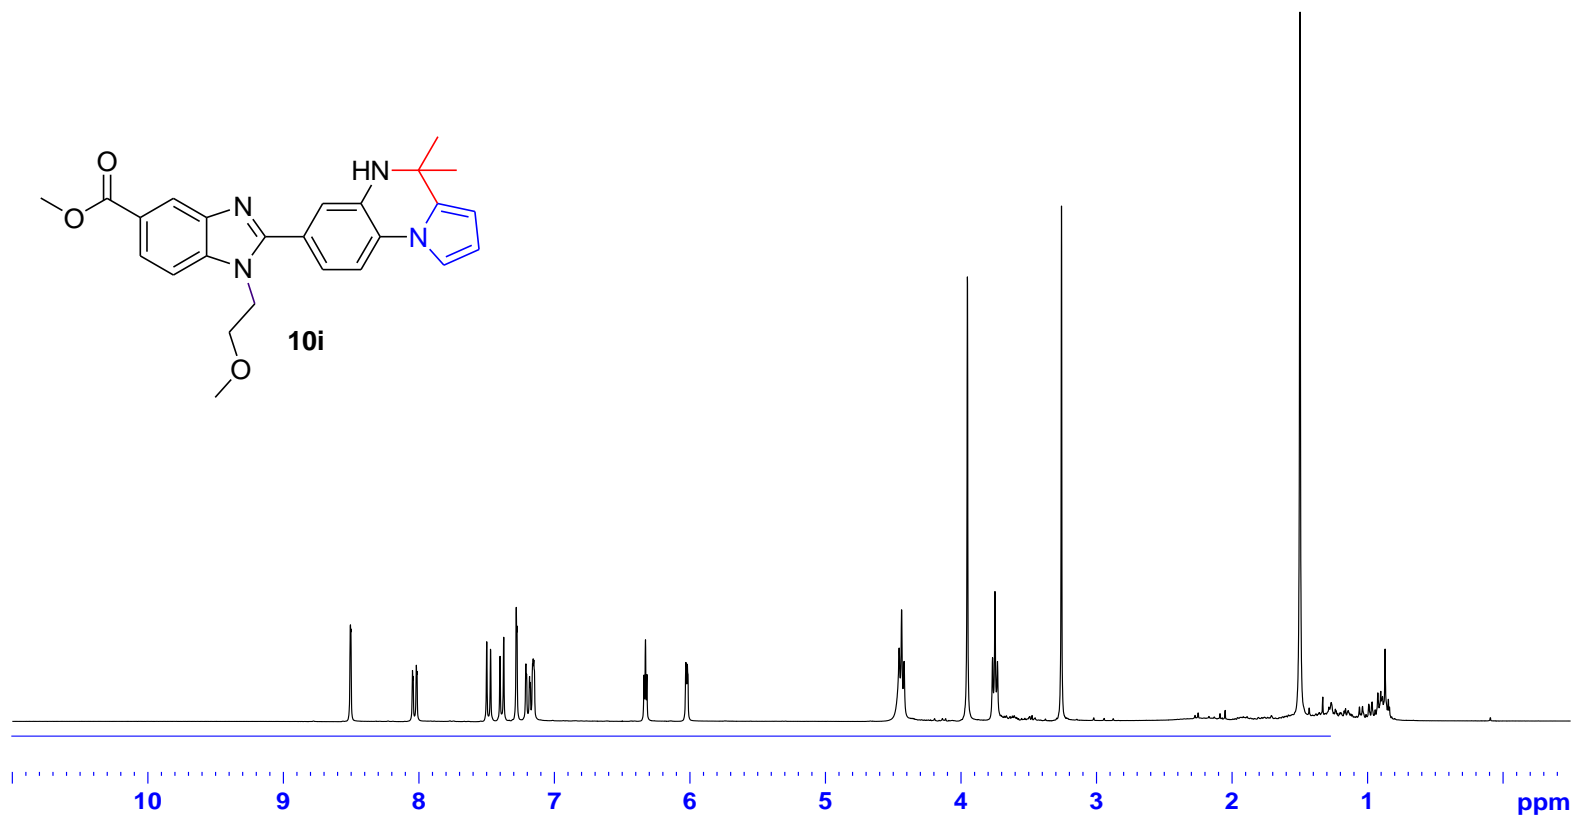

$^1\text{H}$ NMR spectrum (300 MHz) of final compound **10i** in  $\text{CDCl}_3$

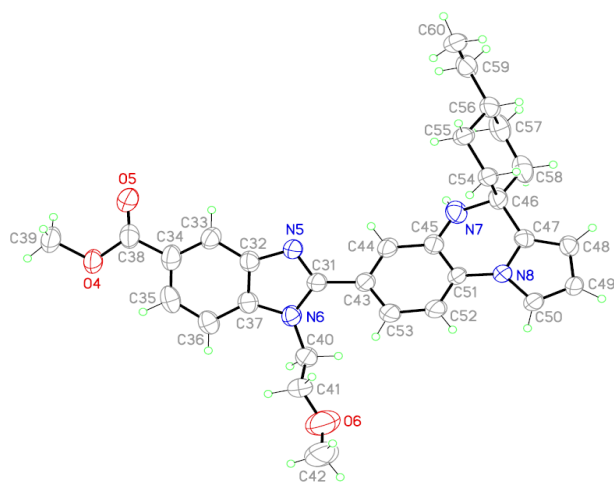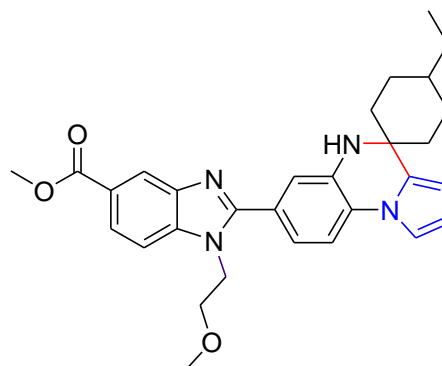

**10h**

### ORTEP diagram of Methyl

**2-(4-ethyl-5'*H*-spiro[cyclohexane-1,4'-pyrrolo[1,2-*a*]quinoxalin]-7'-yl)**

**-1-(2-methoxyethyl)-1*H*-benzimidazole-5-carboxylate (10h)**

Table 1. Crystal data and structure refinement for **10h**

|                                   |                                                               |                  |
|-----------------------------------|---------------------------------------------------------------|------------------|
| Identification code               | 101119lts                                                     |                  |
| Empirical formula                 | C <sub>30</sub> H <sub>34</sub> N <sub>4</sub> O <sub>3</sub> |                  |
| Formula weight                    | 498.61                                                        |                  |
| Temperature                       | 100(2) K                                                      |                  |
| Wavelength                        | 0.71073 Å                                                     |                  |
| Crystal system                    | Triclinic                                                     |                  |
| Space group                       | P -1                                                          |                  |
| Unit cell dimensions              | a = 12.3481(6) Å                                              | α = 105.903(2)°. |
|                                   | b = 15.7551(8) Å                                              | β = 108.938(2)°. |
|                                   | c = 16.7496(9) Å                                              | γ = 93.046(2)°.  |
| Volume                            | 2927.8(3) Å <sup>3</sup>                                      |                  |
| Z                                 | 4                                                             |                  |
| Density (calculated)              | 1.131 Mg/m <sup>3</sup>                                       |                  |
| Absorption coefficient            | 0.074 mm <sup>-1</sup>                                        |                  |
| F(000)                            | 1064                                                          |                  |
| Crystal size                      | 0.15 x 0.15 x 0.05 mm <sup>3</sup>                            |                  |
| Theta range for data collection   | 1.77 to 26.42°.                                               |                  |
| Index ranges                      | -15 ≤ h ≤ 15, -19 ≤ k ≤ 17, -20 ≤ l ≤ 18                      |                  |
| Reflections collected             | 43472                                                         |                  |
| Independent reflections           | 11900 [R(int) = 0.0937]                                       |                  |
| Completeness to theta = 26.42°    | 98.7 %                                                        |                  |
| Absorption correction             | Semi-empirical from equivalents                               |                  |
| Max. and min. transmission        | 0.9486 and 0.6811                                             |                  |
| Refinement method                 | Full-matrix least-squares on F <sup>2</sup>                   |                  |
| Data / restraints / parameters    | 11900 / 20 / 717                                              |                  |
| Goodness-of-fit on F <sup>2</sup> | 0.956                                                         |                  |
| Final R indices [I > 2σ(I)]       | R1 = 0.0861, wR2 = 0.2406                                     |                  |
| R indices (all data)              | R1 = 0.1378, wR2 = 0.2707                                     |                  |
| Largest diff. peak and hole       | 0.823 and -0.380 e.Å <sup>-3</sup>                            |                  |

Table 2. Atomic coordinates ( $\times 10^4$ ) and equivalent isotropic displacement parameters ( $\text{\AA}^2 \times 10^3$ ) for 101119LTs.  $U(\text{eq})$  is defined as one third of the trace of the orthogonalized  $U^{ij}$  tensor.

|       | x        | y       | z       | U(eq) |
|-------|----------|---------|---------|-------|
| C(1)  | 806(3)   | 3630(2) | 1630(2) | 54(1) |
| C(2)  | 1736(3)  | 4440(2) | 1144(2) | 57(1) |
| C(3)  | 2503(4)  | 4795(2) | 825(2)  | 73(1) |
| C(4)  | 2306(5)  | 5590(3) | 638(3)  | 79(1) |
| C(5)  | 1365(5)  | 6018(3) | 752(3)  | 96(2) |
| C(6)  | 602(4)   | 5658(3) | 1063(3) | 87(2) |
| C(7)  | 791(4)   | 4862(2) | 1244(2) | 68(1) |
| C(10) | -701(3)  | 4603(3) | 1901(3) | 79(1) |
| C(11) | -202(4)  | 5285(3) | 2818(3) | 87(2) |
| C(12) | 52(4)    | 4418(3) | 3800(3) | 92(2) |
| C(13) | 492(3)   | 2923(2) | 1979(2) | 53(1) |
| C(14) | -623(3)  | 2436(3) | 1642(2) | 59(1) |
| C(15) | -851(3)  | 1775(2) | 1990(2) | 57(1) |
| C(16) | 5(3)     | 1598(2) | 2665(2) | 53(1) |
| C(17) | -1241(3) | 532(3)  | 3010(3) | 70(1) |
| C(18) | -1020(3) | -12(3)  | 3519(3) | 75(1) |
| C(19) | 211(3)   | 80(3)   | 3930(3) | 67(1) |
| C(20) | 692(3)   | 687(2)  | 3639(2) | 54(1) |
| C(21) | 1925(3)  | 1011(2) | 3781(2) | 48(1) |
| C(22) | 1137(3)  | 2085(2) | 3006(2) | 49(1) |
| C(23) | 1361(3)  | 2736(2) | 2646(2) | 47(1) |
| C(24) | 2719(3)  | 1033(2) | 4704(2) | 52(1) |
| C(25) | 3997(3)  | 1273(2) | 4848(2) | 48(1) |
| C(26) | 4364(3)  | 665(2)  | 4135(2) | 46(1) |
| C(27) | 3573(3)  | 639(2)  | 3215(2) | 47(1) |
| C(28) | 2299(3)  | 382(2)  | 3069(2) | 49(1) |
| C(29) | 5639(3)  | 953(2)  | 4314(2) | 52(1) |
| C(30) | 6133(3)  | 358(3)  | 3692(3) | 66(1) |
| C(31) | 4777(3)  | 6894(2) | 6276(2) | 42(1) |
| C(32) | 5351(3)  | 6314(2) | 5201(2) | 44(1) |
| C(33) | 6002(3)  | 6022(2) | 4663(2) | 51(1) |
| C(34) | 5418(3)  | 5473(2) | 3807(2) | 57(1) |

|       |          |          |          |        |
|-------|----------|----------|----------|--------|
| C(35) | 4213(3)  | 5209(2)  | 3486(2)  | 58(1)  |
| C(36) | 3563(3)  | 5488(2)  | 4012(2)  | 53(1)  |
| C(37) | 4157(3)  | 6046(2)  | 4872(2)  | 44(1)  |
| C(40) | 2598(3)  | 6279(2)  | 5548(2)  | 55(1)  |
| C(41) | 1829(3)  | 6853(3)  | 5106(3)  | 68(1)  |
| C(42) | 4(4)     | 7333(4)  | 4919(4)  | 127(2) |
| C(43) | 4796(2)  | 7357(2)  | 7166(2)  | 44(1)  |
| C(44) | 5732(3)  | 7292(2)  | 7891(2)  | 45(1)  |
| C(45) | 5833(3)  | 7734(2)  | 8757(2)  | 51(1)  |
| C(46) | 7149(3)  | 8379(2)  | 10305(2) | 51(1)  |
| C(51) | 5005(3)  | 8266(3)  | 8898(2)  | 72(1)  |
| C(52) | 4106(3)  | 8345(3)  | 8201(3)  | 81(1)  |
| C(53) | 3977(3)  | 7894(2)  | 7332(2)  | 60(1)  |
| C(54) | 7877(2)  | 9123(2)  | 10192(2) | 45(1)  |
| C(55) | 8994(2)  | 8855(2)  | 10071(2) | 46(1)  |
| C(56) | 9736(3)  | 8583(2)  | 10852(2) | 50(1)  |
| C(57) | 9047(3)  | 7829(2)  | 10973(2) | 63(1)  |
| C(58) | 7896(3)  | 8062(2)  | 11057(2) | 63(1)  |
| C(59) | 10875(3) | 8315(3)  | 10761(2) | 66(1)  |
| C(60) | 11644(3) | 9011(3)  | 10644(3) | 80(1)  |
| N(1)  | 1722(3)  | 3661(2)  | 1377(2)  | 56(1)  |
| N(2)  | 207(3)   | 4332(2)  | 1557(2)  | 64(1)  |
| N(3)  | 1975(2)  | 1927(2)  | 3713(2)  | 49(1)  |
| N(4)  | -197(2)  | 960(2)   | 3068(2)  | 54(1)  |
| N(5)  | 5720(2)  | 6842(2)  | 6074(2)  | 43(1)  |
| N(6)  | 3791(2)  | 6428(2)  | 5568(2)  | 45(1)  |
| N(7)  | 6702(2)  | 7613(2)  | 9478(2)  | 54(1)  |
| O(3)  | 593(2)   | 4954(2)  | 3438(2)  | 76(1)  |
| O(6)  | 810(3)   | 6777(2)  | 5280(3)  | 106(1) |
| C(8)  | 2901(15) | 5999(11) | 334(12)  | 64(3)  |
| C(9)  | 3645(8)  | 7225(6)  | 24(6)    | 74(2)  |
| O(1)  | 2800(5)  | 6803(3)  | 317(4)   | 58(1)  |
| O(2)  | 3529(6)  | 5546(5)  | -34(5)   | 83(1)  |
| C(8') | 3339(12) | 6008(11) | 293(11)  | 64(3)  |
| C(9') | 5257(7)  | 6218(6)  | 307(6)   | 74(2)  |
| O(1') | 4347(5)  | 5783(3)  | 509(3)   | 58(1)  |
| O(2') | 3102(6)  | 6593(5)  | -103(5)  | 83(1)  |

|        |          |          |          |       |
|--------|----------|----------|----------|-------|
| C(38)  | 6004(9)  | 5085(7)  | 3212(7)  | 50(2) |
| C(39)  | 5891(8)  | 4333(7)  | 1735(5)  | 72(2) |
| O(4)   | 5289(6)  | 4698(5)  | 2348(4)  | 59(2) |
| O(5)   | 7037(6)  | 5167(5)  | 3450(5)  | 63(2) |
| C(38') | 6321(12) | 5318(12) | 3307(11) | 50(2) |
| C(39') | 6525(11) | 4285(10) | 2043(8)  | 72(2) |
| O(4')  | 5793(8)  | 4622(8)  | 2556(7)  | 59(2) |
| O(5')  | 7346(9)  | 5554(6)  | 3561(8)  | 63(2) |
| N(8)   | 5105(5)  | 8873(4)  | 9724(4)  | 36(1) |
| C(47)  | 6060(8)  | 8858(5)  | 10435(6) | 36(2) |
| C(48)  | 5883(7)  | 9297(5)  | 11198(6) | 44(2) |
| C(49)  | 4791(5)  | 9622(5)  | 10936(4) | 44(1) |
| C(50)  | 4338(5)  | 9349(4)  | 10046(4) | 44(1) |
| N(8')  | 5161(5)  | 8500(4)  | 9863(4)  | 36(1) |
| C(47') | 6186(9)  | 8570(6)  | 10548(6) | 36(2) |
| C(48') | 6017(8)  | 8958(5)  | 11329(6) | 44(2) |
| C(49') | 4842(5)  | 9124(5)  | 11100(4) | 44(1) |
| C(50') | 4337(5)  | 8826(5)  | 10216(4) | 44(1) |

---



Table 3. Bond lengths [ $\text{\AA}$ ] and angles [ $^\circ$ ] for 101119LTs.

---

|              |           |
|--------------|-----------|
| C(1)-N(1)    | 1.333(5)  |
| C(1)-N(2)    | 1.375(4)  |
| C(1)-C(13)   | 1.480(5)  |
| C(2)-N(1)    | 1.388(5)  |
| C(2)-C(3)    | 1.389(6)  |
| C(2)-C(7)    | 1.407(5)  |
| C(3)-C(4)    | 1.387(5)  |
| C(3)-H(3)    | 0.9500    |
| C(4)-C(8)    | 1.259(14) |
| C(4)-C(5)    | 1.414(7)  |
| C(4)-C(8')   | 1.730(12) |
| C(5)-C(6)    | 1.380(7)  |
| C(5)-H(5)    | 0.9500    |
| C(6)-C(7)    | 1.383(6)  |
| C(6)-H(6)    | 0.9500    |
| C(7)-N(2)    | 1.383(6)  |
| C(10)-N(2)   | 1.452(5)  |
| C(10)-C(11)  | 1.518(5)  |
| C(10)-H(10A) | 0.9900    |
| C(10)-H(10B) | 0.9900    |
| C(11)-O(3)   | 1.416(5)  |
| C(11)-H(11A) | 0.9900    |
| C(11)-H(11B) | 0.9900    |
| C(12)-O(3)   | 1.418(5)  |
| C(12)-H(12A) | 0.9800    |
| C(12)-H(12B) | 0.9800    |
| C(12)-H(12C) | 0.9800    |
| C(13)-C(23)  | 1.387(4)  |
| C(13)-C(14)  | 1.395(5)  |
| C(14)-C(15)  | 1.382(5)  |
| C(14)-H(14)  | 0.9500    |
| C(15)-C(16)  | 1.379(5)  |
| C(15)-H(15)  | 0.9500    |
| C(16)-N(4)   | 1.408(5)  |
| C(16)-C(22)  | 1.413(4)  |

|              |          |
|--------------|----------|
| C(17)-C(18)  | 1.346(6) |
| C(17)-N(4)   | 1.384(4) |
| C(17)-H(17)  | 0.9500   |
| C(18)-C(19)  | 1.431(5) |
| C(18)-H(18)  | 0.9500   |
| C(19)-C(20)  | 1.374(5) |
| C(19)-H(19)  | 0.9500   |
| C(20)-N(4)   | 1.377(4) |
| C(20)-C(21)  | 1.501(4) |
| C(21)-N(3)   | 1.478(4) |
| C(21)-C(24)  | 1.529(4) |
| C(21)-C(28)  | 1.541(4) |
| C(22)-C(23)  | 1.382(5) |
| C(22)-N(3)   | 1.389(4) |
| C(23)-H(23)  | 0.9500   |
| C(24)-C(25)  | 1.526(4) |
| C(24)-H(24A) | 0.9900   |
| C(24)-H(24B) | 0.9900   |
| C(25)-C(26)  | 1.524(4) |
| C(25)-H(25A) | 0.9900   |
| C(25)-H(25B) | 0.9900   |
| C(26)-C(27)  | 1.521(4) |
| C(26)-C(29)  | 1.523(4) |
| C(26)-H(26)  | 1.0000   |
| C(27)-C(28)  | 1.525(4) |
| C(27)-H(27A) | 0.9900   |
| C(27)-H(27B) | 0.9900   |
| C(28)-H(28A) | 0.9900   |
| C(28)-H(28B) | 0.9900   |
| C(29)-C(30)  | 1.508(5) |
| C(29)-H(29A) | 0.9900   |
| C(29)-H(29B) | 0.9900   |
| C(30)-H(30A) | 0.9800   |
| C(30)-H(30B) | 0.9800   |
| C(30)-H(30C) | 0.9800   |
| C(31)-N(5)   | 1.313(4) |
| C(31)-N(6)   | 1.385(4) |

|              |           |
|--------------|-----------|
| C(31)-C(43)  | 1.461(4)  |
| C(32)-N(5)   | 1.377(4)  |
| C(32)-C(37)  | 1.391(4)  |
| C(32)-C(33)  | 1.397(4)  |
| C(33)-C(34)  | 1.382(5)  |
| C(33)-H(33)  | 0.9500    |
| C(34)-C(35)  | 1.403(5)  |
| C(34)-C(38)  | 1.439(11) |
| C(34)-C(38') | 1.589(16) |
| C(35)-C(36)  | 1.377(5)  |
| C(35)-H(35)  | 0.9500    |
| C(36)-C(37)  | 1.391(4)  |
| C(36)-H(36)  | 0.9500    |
| C(37)-N(6)   | 1.383(4)  |
| C(40)-N(6)   | 1.467(4)  |
| C(40)-C(41)  | 1.506(5)  |
| C(40)-H(40A) | 0.9900    |
| C(40)-H(40B) | 0.9900    |
| C(41)-O(6)   | 1.387(4)  |
| C(41)-H(41A) | 0.9900    |
| C(41)-H(41B) | 0.9900    |
| C(42)-O(6)   | 1.454(6)  |
| C(42)-H(42A) | 0.9800    |
| C(42)-H(42B) | 0.9800    |
| C(42)-H(42C) | 0.9800    |
| C(43)-C(53)  | 1.400(4)  |
| C(43)-C(44)  | 1.411(4)  |
| C(44)-C(45)  | 1.387(4)  |
| C(44)-H(44)  | 0.9500    |
| C(45)-C(51)  | 1.395(5)  |
| C(45)-N(7)   | 1.397(4)  |
| C(46)-C(47') | 1.398(11) |
| C(46)-N(7)   | 1.482(4)  |
| C(46)-C(58)  | 1.526(5)  |
| C(46)-C(54)  | 1.530(5)  |
| C(46)-C(47)  | 1.622(9)  |
| C(51)-C(52)  | 1.366(6)  |

|              |           |
|--------------|-----------|
| C(51)-N(8)   | 1.413(7)  |
| C(51)-N(8')  | 1.499(7)  |
| C(52)-C(53)  | 1.386(5)  |
| C(52)-H(52)  | 0.9500    |
| C(53)-H(53)  | 0.9500    |
| C(54)-C(55)  | 1.522(4)  |
| C(54)-H(54A) | 0.9900    |
| C(54)-H(54B) | 0.9900    |
| C(55)-C(56)  | 1.517(4)  |
| C(55)-H(55A) | 0.9900    |
| C(55)-H(55B) | 0.9900    |
| C(56)-C(57)  | 1.522(5)  |
| C(56)-C(59)  | 1.531(5)  |
| C(56)-H(56)  | 1.0000    |
| C(57)-C(58)  | 1.527(5)  |
| C(57)-H(57A) | 0.9900    |
| C(57)-H(57B) | 0.9900    |
| C(58)-H(58A) | 0.9900    |
| C(58)-H(58B) | 0.9900    |
| C(59)-C(60)  | 1.506(6)  |
| C(59)-H(59A) | 0.9900    |
| C(59)-H(59B) | 0.9900    |
| C(60)-H(60A) | 0.9800    |
| C(60)-H(60B) | 0.9800    |
| C(60)-H(60C) | 0.9800    |
| N(3)-H(3A)   | 0.8800    |
| N(7)-H(7)    | 0.8800    |
| C(8)-O(2)    | 1.272(12) |
| C(8)-O(1)    | 1.287(16) |
| C(9)-O(1)    | 1.487(9)  |
| C(9)-H(9A)   | 0.9800    |
| C(9)-H(9B)   | 0.9800    |
| C(9)-H(9C)   | 0.9800    |
| C(8')-O(2')  | 1.271(17) |
| C(8')-O(1')  | 1.276(15) |
| C(9')-O(1')  | 1.462(8)  |
| C(9')-H(9'1) | 0.9800    |

|                 |           |
|-----------------|-----------|
| C(9')-H(9'2)    | 0.9800    |
| C(9')-H(9'3)    | 0.9800    |
| C(38)-O(5)      | 1.194(10) |
| C(38)-O(4)      | 1.370(10) |
| C(39)-O(4)      | 1.468(8)  |
| C(39)-H(39A)    | 0.9800    |
| C(39)-H(39B)    | 0.9800    |
| C(39)-H(39C)    | 0.9800    |
| C(38'')-O(5')   | 1.198(12) |
| C(38'')-O(4')   | 1.358(12) |
| C(39'')-O(4')   | 1.464(11) |
| C(39'')-H(39D)  | 0.9800    |
| C(39'')-H(39E)  | 0.9800    |
| C(39'')-H(39F)  | 0.9800    |
| N(8)-C(47)      | 1.385(9)  |
| N(8)-C(50)      | 1.392(8)  |
| C(47)-C(48)     | 1.369(10) |
| C(48)-C(49)     | 1.444(9)  |
| C(48)-H(48)     | 0.9500    |
| C(49)-C(50)     | 1.342(8)  |
| C(49)-H(49)     | 0.9500    |
| C(50)-H(50)     | 0.9500    |
| N(8')-C(47')    | 1.381(10) |
| N(8')-C(50')    | 1.389(8)  |
| C(47')-C(48')   | 1.371(10) |
| C(48'')-C(49')  | 1.434(10) |
| C(48'')-H(48')  | 0.9500    |
| C(49')-C(50')   | 1.338(8)  |
| C(49')-H(49')   | 0.9500    |
| C(50')-H(50')   | 0.9500    |
| N(1)-C(1)-N(2)  | 113.2(4)  |
| N(1)-C(1)-C(13) | 123.1(3)  |
| N(2)-C(1)-C(13) | 123.7(3)  |
| N(1)-C(2)-C(3)  | 128.9(3)  |
| N(1)-C(2)-C(7)  | 110.1(4)  |
| C(3)-C(2)-C(7)  | 120.9(4)  |
| C(4)-C(3)-C(2)  | 116.7(4)  |

|                     |          |
|---------------------|----------|
| C(4)-C(3)-H(3)      | 121.6    |
| C(2)-C(3)-H(3)      | 121.6    |
| C(8)-C(4)-C(3)      | 125.4(8) |
| C(8)-C(4)-C(5)      | 112.5(8) |
| C(3)-C(4)-C(5)      | 122.1(5) |
| C(8)-C(4)-C(8')     | 12.3(12) |
| C(3)-C(4)-C(8')     | 113.5(7) |
| C(5)-C(4)-C(8')     | 124.3(6) |
| C(6)-C(5)-C(4)      | 120.8(4) |
| C(6)-C(5)-H(5)      | 119.6    |
| C(4)-C(5)-H(5)      | 119.6    |
| C(5)-C(6)-C(7)      | 117.2(5) |
| C(5)-C(6)-H(6)      | 121.4    |
| C(7)-C(6)-H(6)      | 121.4    |
| C(6)-C(7)-N(2)      | 132.0(4) |
| C(6)-C(7)-C(2)      | 122.2(5) |
| N(2)-C(7)-C(2)      | 105.8(3) |
| N(2)-C(10)-C(11)    | 111.2(3) |
| N(2)-C(10)-H(10A)   | 109.4    |
| C(11)-C(10)-H(10A)  | 109.4    |
| N(2)-C(10)-H(10B)   | 109.4    |
| C(11)-C(10)-H(10B)  | 109.4    |
| H(10A)-C(10)-H(10B) | 108.0    |
| O(3)-C(11)-C(10)    | 112.4(3) |
| O(3)-C(11)-H(11A)   | 109.1    |
| C(10)-C(11)-H(11A)  | 109.1    |
| O(3)-C(11)-H(11B)   | 109.1    |
| C(10)-C(11)-H(11B)  | 109.1    |
| H(11A)-C(11)-H(11B) | 107.9    |
| O(3)-C(12)-H(12A)   | 109.5    |
| O(3)-C(12)-H(12B)   | 109.5    |
| H(12A)-C(12)-H(12B) | 109.5    |
| O(3)-C(12)-H(12C)   | 109.5    |
| H(12A)-C(12)-H(12C) | 109.5    |
| H(12B)-C(12)-H(12C) | 109.5    |
| C(23)-C(13)-C(14)   | 120.2(4) |
| C(23)-C(13)-C(1)    | 117.5(3) |

|                    |          |
|--------------------|----------|
| C(14)-C(13)-C(1)   | 122.2(3) |
| C(15)-C(14)-C(13)  | 119.2(3) |
| C(15)-C(14)-H(14)  | 120.4    |
| C(13)-C(14)-H(14)  | 120.4    |
| C(16)-C(15)-C(14)  | 120.9(3) |
| C(16)-C(15)-H(15)  | 119.6    |
| C(14)-C(15)-H(15)  | 119.6    |
| C(15)-C(16)-N(4)   | 123.0(3) |
| C(15)-C(16)-C(22)  | 120.3(4) |
| N(4)-C(16)-C(22)   | 116.7(3) |
| C(18)-C(17)-N(4)   | 108.6(3) |
| C(18)-C(17)-H(17)  | 125.7    |
| N(4)-C(17)-H(17)   | 125.7    |
| C(17)-C(18)-C(19)  | 107.9(4) |
| C(17)-C(18)-H(18)  | 126.1    |
| C(19)-C(18)-H(18)  | 126.1    |
| C(20)-C(19)-C(18)  | 106.9(4) |
| C(20)-C(19)-H(19)  | 126.6    |
| C(18)-C(19)-H(19)  | 126.6    |
| C(19)-C(20)-N(4)   | 108.1(3) |
| C(19)-C(20)-C(21)  | 132.2(3) |
| N(4)-C(20)-C(21)   | 119.6(3) |
| N(3)-C(21)-C(20)   | 107.3(3) |
| N(3)-C(21)-C(24)   | 109.3(3) |
| C(20)-C(21)-C(24)  | 110.2(3) |
| N(3)-C(21)-C(28)   | 111.0(3) |
| C(20)-C(21)-C(28)  | 109.4(3) |
| C(24)-C(21)-C(28)  | 109.7(3) |
| C(23)-C(22)-N(3)   | 121.8(3) |
| C(23)-C(22)-C(16)  | 118.5(3) |
| N(3)-C(22)-C(16)   | 119.6(3) |
| C(22)-C(23)-C(13)  | 120.9(3) |
| C(22)-C(23)-H(23)  | 119.5    |
| C(13)-C(23)-H(23)  | 119.5    |
| C(25)-C(24)-C(21)  | 112.2(3) |
| C(25)-C(24)-H(24A) | 109.2    |
| C(21)-C(24)-H(24A) | 109.2    |

|                     |          |
|---------------------|----------|
| C(25)-C(24)-H(24B)  | 109.2    |
| C(21)-C(24)-H(24B)  | 109.2    |
| H(24A)-C(24)-H(24B) | 107.9    |
| C(26)-C(25)-C(24)   | 112.8(3) |
| C(26)-C(25)-H(25A)  | 109.0    |
| C(24)-C(25)-H(25A)  | 109.0    |
| C(26)-C(25)-H(25B)  | 109.0    |
| C(24)-C(25)-H(25B)  | 109.0    |
| H(25A)-C(25)-H(25B) | 107.8    |
| C(27)-C(26)-C(29)   | 113.2(3) |
| C(27)-C(26)-C(25)   | 110.7(3) |
| C(29)-C(26)-C(25)   | 109.8(3) |
| C(27)-C(26)-H(26)   | 107.7    |
| C(29)-C(26)-H(26)   | 107.7    |
| C(25)-C(26)-H(26)   | 107.7    |
| C(26)-C(27)-C(28)   | 112.0(3) |
| C(26)-C(27)-H(27A)  | 109.2    |
| C(28)-C(27)-H(27A)  | 109.2    |
| C(26)-C(27)-H(27B)  | 109.2    |
| C(28)-C(27)-H(27B)  | 109.2    |
| H(27A)-C(27)-H(27B) | 107.9    |
| C(27)-C(28)-C(21)   | 112.0(2) |
| C(27)-C(28)-H(28A)  | 109.2    |
| C(21)-C(28)-H(28A)  | 109.2    |
| C(27)-C(28)-H(28B)  | 109.2    |
| C(21)-C(28)-H(28B)  | 109.2    |
| H(28A)-C(28)-H(28B) | 107.9    |
| C(30)-C(29)-C(26)   | 114.8(3) |
| C(30)-C(29)-H(29A)  | 108.6    |
| C(26)-C(29)-H(29A)  | 108.6    |
| C(30)-C(29)-H(29B)  | 108.6    |
| C(26)-C(29)-H(29B)  | 108.6    |
| H(29A)-C(29)-H(29B) | 107.5    |
| C(29)-C(30)-H(30A)  | 109.5    |
| C(29)-C(30)-H(30B)  | 109.5    |
| H(30A)-C(30)-H(30B) | 109.5    |
| C(29)-C(30)-H(30C)  | 109.5    |



|                     |          |
|---------------------|----------|
| H(30A)-C(30)-H(30C) | 109.5    |
| H(30B)-C(30)-H(30C) | 109.5    |
| N(5)-C(31)-N(6)     | 112.5(3) |
| N(5)-C(31)-C(43)    | 122.9(3) |
| N(6)-C(31)-C(43)    | 124.6(3) |
| N(5)-C(32)-C(37)    | 110.7(3) |
| N(5)-C(32)-C(33)    | 129.2(3) |
| C(37)-C(32)-C(33)   | 120.0(3) |
| C(34)-C(33)-C(32)   | 117.8(3) |
| C(34)-C(33)-H(33)   | 121.1    |
| C(32)-C(33)-H(33)   | 121.1    |
| C(33)-C(34)-C(35)   | 121.4(3) |
| C(33)-C(34)-C(38)   | 122.7(5) |
| C(35)-C(34)-C(38)   | 115.8(4) |
| C(33)-C(34)-C(38')  | 108.0(5) |
| C(35)-C(34)-C(38')  | 130.4(6) |
| C(38)-C(34)-C(38')  | 17.1(6)  |
| C(36)-C(35)-C(34)   | 121.4(3) |
| C(36)-C(35)-H(35)   | 119.3    |
| C(34)-C(35)-H(35)   | 119.3    |
| C(35)-C(36)-C(37)   | 116.9(3) |
| C(35)-C(36)-H(36)   | 121.6    |
| C(37)-C(36)-H(36)   | 121.6    |
| N(6)-C(37)-C(32)    | 105.3(3) |
| N(6)-C(37)-C(36)    | 132.1(3) |
| C(32)-C(37)-C(36)   | 122.6(3) |
| N(6)-C(40)-C(41)    | 113.0(3) |
| N(6)-C(40)-H(40A)   | 109.0    |
| C(41)-C(40)-H(40A)  | 109.0    |
| N(6)-C(40)-H(40B)   | 109.0    |
| C(41)-C(40)-H(40B)  | 109.0    |
| H(40A)-C(40)-H(40B) | 107.8    |
| O(6)-C(41)-C(40)    | 107.2(3) |
| O(6)-C(41)-H(41A)   | 110.3    |
| C(40)-C(41)-H(41A)  | 110.3    |
| O(6)-C(41)-H(41B)   | 110.3    |
| C(40)-C(41)-H(41B)  | 110.3    |

|                     |          |
|---------------------|----------|
| H(41A)-C(41)-H(41B) | 108.5    |
| O(6)-C(42)-H(42A)   | 109.5    |
| O(6)-C(42)-H(42B)   | 109.5    |
| H(42A)-C(42)-H(42B) | 109.5    |
| O(6)-C(42)-H(42C)   | 109.5    |
| H(42A)-C(42)-H(42C) | 109.5    |
| H(42B)-C(42)-H(42C) | 109.5    |
| C(53)-C(43)-C(44)   | 118.9(3) |
| C(53)-C(43)-C(31)   | 123.6(3) |
| C(44)-C(43)-C(31)   | 117.4(3) |
| C(45)-C(44)-C(43)   | 121.0(3) |
| C(45)-C(44)-H(44)   | 119.5    |
| C(43)-C(44)-H(44)   | 119.5    |
| C(44)-C(45)-C(51)   | 118.6(3) |
| C(44)-C(45)-N(7)    | 121.3(3) |
| C(51)-C(45)-N(7)    | 120.0(3) |
| C(47')-C(46)-N(7)   | 105.5(4) |
| C(47')-C(46)-C(58)  | 102.5(4) |
| N(7)-C(46)-C(58)    | 109.1(3) |
| C(47')-C(46)-C(54)  | 119.1(4) |
| N(7)-C(46)-C(54)    | 110.8(3) |
| C(58)-C(46)-C(54)   | 109.3(3) |
| C(47')-C(46)-C(47)  | 19.2(5)  |
| N(7)-C(46)-C(47)    | 108.0(4) |
| C(58)-C(46)-C(47)   | 118.0(4) |
| C(54)-C(46)-C(47)   | 101.5(4) |
| C(52)-C(51)-C(45)   | 120.9(3) |
| C(52)-C(51)-N(8)    | 113.7(4) |
| C(45)-C(51)-N(8)    | 124.6(4) |
| C(52)-C(51)-N(8')   | 130.0(4) |
| C(45)-C(51)-N(8')   | 107.6(4) |
| N(8)-C(51)-N(8')    | 27.1(2)  |
| C(51)-C(52)-C(53)   | 121.4(3) |
| C(51)-C(52)-H(52)   | 119.3    |
| C(53)-C(52)-H(52)   | 119.3    |
| C(52)-C(53)-C(43)   | 119.2(3) |
| C(52)-C(53)-H(53)   | 120.4    |

|                     |          |
|---------------------|----------|
| C(43)-C(53)-H(53)   | 120.4    |
| C(55)-C(54)-C(46)   | 112.8(3) |
| C(55)-C(54)-H(54A)  | 109.0    |
| C(46)-C(54)-H(54A)  | 109.0    |
| C(55)-C(54)-H(54B)  | 109.0    |
| C(46)-C(54)-H(54B)  | 109.0    |
| H(54A)-C(54)-H(54B) | 107.8    |
| C(56)-C(55)-C(54)   | 111.2(3) |
| C(56)-C(55)-H(55A)  | 109.4    |
| C(54)-C(55)-H(55A)  | 109.4    |
| C(56)-C(55)-H(55B)  | 109.4    |
| C(54)-C(55)-H(55B)  | 109.4    |
| H(55A)-C(55)-H(55B) | 108.0    |
| C(55)-C(56)-C(57)   | 109.8(3) |
| C(55)-C(56)-C(59)   | 112.9(3) |
| C(57)-C(56)-C(59)   | 110.5(3) |
| C(55)-C(56)-H(56)   | 107.8    |
| C(57)-C(56)-H(56)   | 107.8    |
| C(59)-C(56)-H(56)   | 107.8    |
| C(56)-C(57)-C(58)   | 112.5(3) |
| C(56)-C(57)-H(57A)  | 109.1    |
| C(58)-C(57)-H(57A)  | 109.1    |
| C(56)-C(57)-H(57B)  | 109.1    |
| C(58)-C(57)-H(57B)  | 109.1    |
| H(57A)-C(57)-H(57B) | 107.8    |
| C(46)-C(58)-C(57)   | 113.8(3) |
| C(46)-C(58)-H(58A)  | 108.8    |
| C(57)-C(58)-H(58A)  | 108.8    |
| C(46)-C(58)-H(58B)  | 108.8    |
| C(57)-C(58)-H(58B)  | 108.8    |
| H(58A)-C(58)-H(58B) | 107.7    |
| C(60)-C(59)-C(56)   | 115.7(3) |
| C(60)-C(59)-H(59A)  | 108.3    |
| C(56)-C(59)-H(59A)  | 108.3    |
| C(60)-C(59)-H(59B)  | 108.3    |
| C(56)-C(59)-H(59B)  | 108.3    |
| H(59A)-C(59)-H(59B) | 107.4    |

|                     |           |
|---------------------|-----------|
| C(59)-C(60)-H(60A)  | 109.5     |
| C(59)-C(60)-H(60B)  | 109.5     |
| H(60A)-C(60)-H(60B) | 109.5     |
| C(59)-C(60)-H(60C)  | 109.5     |
| H(60A)-C(60)-H(60C) | 109.5     |
| H(60B)-C(60)-H(60C) | 109.5     |
| C(1)-N(1)-C(2)      | 104.6(3)  |
| C(1)-N(2)-C(7)      | 106.3(3)  |
| C(1)-N(2)-C(10)     | 128.6(4)  |
| C(7)-N(2)-C(10)     | 123.9(3)  |
| C(22)-N(3)-C(21)    | 118.2(2)  |
| C(22)-N(3)-H(3A)    | 120.9     |
| C(21)-N(3)-H(3A)    | 120.9     |
| C(20)-N(4)-C(17)    | 108.6(3)  |
| C(20)-N(4)-C(16)    | 122.3(3)  |
| C(17)-N(4)-C(16)    | 129.0(3)  |
| C(31)-N(5)-C(32)    | 105.2(2)  |
| C(37)-N(6)-C(31)    | 106.3(2)  |
| C(37)-N(6)-C(40)    | 124.9(2)  |
| C(31)-N(6)-C(40)    | 128.6(3)  |
| C(45)-N(7)-C(46)    | 117.2(3)  |
| C(45)-N(7)-H(7)     | 121.4     |
| C(46)-N(7)-H(7)     | 121.4     |
| C(11)-O(3)-C(12)    | 113.4(3)  |
| C(41)-O(6)-C(42)    | 112.8(4)  |
| C(4)-C(8)-O(2)      | 116.3(13) |
| C(4)-C(8)-O(1)      | 122.1(9)  |
| O(2)-C(8)-O(1)      | 121.2(11) |
| C(8)-O(1)-C(9)      | 115.6(7)  |
| O(2')-C(8')-O(1')   | 121.7(10) |
| O(2')-C(8')-C(4)    | 118.5(9)  |
| O(1')-C(8')-C(4)    | 119.5(12) |
| O(1')-C(9')-H(9'1)  | 109.5     |
| O(1')-C(9')-H(9'2)  | 109.5     |
| H(9'1)-C(9')-H(9'2) | 109.5     |
| O(1')-C(9')-H(9'3)  | 109.5     |
| H(9'1)-C(9')-H(9'3) | 109.5     |

|                      |           |
|----------------------|-----------|
| H(9'2)-C(9')-H(9'3)  | 109.5     |
| C(8')-O(1')-C(9')    | 119.2(9)  |
| O(5)-C(38)-O(4)      | 123.5(9)  |
| O(5)-C(38)-C(34)     | 121.7(8)  |
| O(4)-C(38)-C(34)     | 114.5(8)  |
| C(38)-O(4)-C(39)     | 114.5(6)  |
| O(5')-C(38')-O(4')   | 120.2(13) |
| O(5')-C(38')-C(34)   | 131.6(12) |
| O(4')-C(38')-C(34)   | 105.9(8)  |
| O(4')-C(39')-H(39D)  | 109.5     |
| O(4')-C(39')-H(39E)  | 109.5     |
| H(39D)-C(39')-H(39E) | 109.5     |
| O(4')-C(39')-H(39F)  | 109.5     |
| H(39D)-C(39')-H(39F) | 109.5     |
| H(39E)-C(39')-H(39F) | 109.5     |
| C(38')-O(4')-C(39')  | 115.5(10) |
| C(47)-N(8)-C(50)     | 108.9(6)  |
| C(47)-N(8)-C(51)     | 115.1(5)  |
| C(50)-N(8)-C(51)     | 134.1(5)  |
| C(48)-C(47)-N(8)     | 107.9(7)  |
| C(48)-C(47)-C(46)    | 129.8(7)  |
| N(8)-C(47)-C(46)     | 122.3(7)  |
| C(47)-C(48)-C(49)    | 106.9(7)  |
| C(47)-C(48)-H(48)    | 126.6     |
| C(49)-C(48)-H(48)    | 126.6     |
| C(50)-C(49)-C(48)    | 108.1(6)  |
| C(50)-C(49)-H(49)    | 126.0     |
| C(48)-C(49)-H(49)    | 126.0     |
| C(49)-C(50)-N(8)     | 108.2(6)  |
| C(49)-C(50)-H(50)    | 125.9     |
| N(8)-C(50)-H(50)     | 125.9     |
| C(47')-N(8')-C(50')  | 109.0(6)  |
| C(47')-N(8')-C(51)   | 125.9(6)  |
| C(50')-N(8')-C(51)   | 124.3(5)  |
| C(48')-C(47')-N(8')  | 107.6(8)  |
| C(48')-C(47')-C(46)  | 135.4(8)  |
| N(8')-C(47')-C(46)   | 116.1(7)  |

|                      |          |
|----------------------|----------|
| C(47')-C(48')-C(49') | 107.0(7) |
| C(47')-C(48')-H(48') | 126.5    |
| C(49')-C(48')-H(48') | 126.5    |
| C(50')-C(49')-C(48') | 108.3(6) |
| C(50')-C(49')-H(49') | 125.8    |
| C(48')-C(49')-H(49') | 125.8    |
| C(49')-C(50')-N(8')  | 108.1(6) |
| C(49')-C(50')-H(50') | 126.0    |
| N(8')-C(50')-H(50')  | 126.0    |

---

Symmetry transformations used to generate equivalent atoms:

Table 4. Anisotropic displacement parameters ( $\text{\AA}^2 \times 10^3$ ) for 101119LTs. The anisotropic displacement factor exponent takes the form:  $-2\pi^2 [ h^2 a^{*2} U^{11} + \dots + 2 h k a^* b^* U^{12} ]$

|       | U <sup>11</sup> | U <sup>22</sup> | U <sup>33</sup> | U <sup>23</sup> | U <sup>13</sup> | U <sup>12</sup> |
|-------|-----------------|-----------------|-----------------|-----------------|-----------------|-----------------|
| C(1)  | 51(2)           | 53(2)           | 38(2)           | -3(2)           | 0(2)            | 20(2)           |
| C(2)  | 77(2)           | 44(2)           | 34(2)           | 0(1)            | 6(2)            | 20(2)           |
| C(3)  | 122(4)          | 50(2)           | 43(2)           | 10(2)           | 24(2)           | 30(2)           |
| C(4)  | 117(4)          | 45(2)           | 46(2)           | 8(2)            | -2(2)           | 7(2)            |
| C(5)  | 124(4)          | 38(2)           | 72(3)           | 6(2)            | -26(3)          | 13(3)           |
| C(6)  | 91(3)           | 42(2)           | 76(3)           | -6(2)           | -20(3)          | 18(2)           |
| C(7)  | 76(3)           | 44(2)           | 45(2)           | -9(2)           | -12(2)          | 21(2)           |
| C(10) | 49(2)           | 60(2)           | 90(3)           | -13(2)          | 2(2)            | 23(2)           |
| C(11) | 55(2)           | 71(3)           | 101(3)          | -25(2)          | 28(2)           | 6(2)            |
| C(12) | 73(3)           | 96(3)           | 88(3)           | -23(3)          | 50(3)           | -14(2)          |
| C(13) | 48(2)           | 52(2)           | 42(2)           | -6(2)           | 10(2)           | 14(2)           |
| C(14) | 45(2)           | 69(2)           | 42(2)           | -5(2)           | 4(2)            | 22(2)           |
| C(15) | 40(2)           | 64(2)           | 50(2)           | 0(2)            | 8(2)            | 8(2)            |
| C(16) | 35(2)           | 65(2)           | 46(2)           | -1(2)           | 12(2)           | 8(2)            |
| C(17) | 39(2)           | 87(3)           | 66(3)           | 3(2)            | 17(2)           | 1(2)            |
| C(18) | 53(2)           | 91(3)           | 83(3)           | 23(3)           | 33(2)           | 0(2)            |
| C(19) | 53(2)           | 83(3)           | 64(2)           | 16(2)           | 25(2)           | 2(2)            |
| C(20) | 38(2)           | 69(2)           | 49(2)           | 6(2)            | 18(2)           | 4(2)            |
| C(21) | 42(2)           | 55(2)           | 41(2)           | 6(1)            | 15(1)           | 3(1)            |
| C(22) | 39(2)           | 56(2)           | 39(2)           | -5(2)           | 14(1)           | 7(1)            |
| C(23) | 39(2)           | 52(2)           | 37(2)           | -4(1)           | 11(1)           | 9(1)            |
| C(24) | 46(2)           | 64(2)           | 41(2)           | 8(2)            | 16(2)           | 6(2)            |
| C(25) | 41(2)           | 56(2)           | 38(2)           | 6(1)            | 10(1)           | 4(1)            |
| C(26) | 44(2)           | 45(2)           | 45(2)           | 9(1)            | 16(1)           | 6(1)            |
| C(27) | 44(2)           | 47(2)           | 47(2)           | 7(1)            | 19(2)           | 8(1)            |
| C(28) | 43(2)           | 58(2)           | 39(2)           | 8(1)            | 14(1)           | 5(2)            |
| C(29) | 43(2)           | 55(2)           | 57(2)           | 17(2)           | 14(2)           | 9(2)            |
| C(30) | 52(2)           | 77(3)           | 81(3)           | 27(2)           | 33(2)           | 22(2)           |
| C(31) | 39(2)           | 42(2)           | 42(2)           | 6(1)            | 15(1)           | 7(1)            |
| C(32) | 52(2)           | 43(2)           | 38(2)           | 11(1)           | 18(1)           | 15(1)           |
| C(33) | 56(2)           | 58(2)           | 44(2)           | 15(2)           | 24(2)           | 23(2)           |
| C(34) | 78(3)           | 51(2)           | 47(2)           | 12(2)           | 28(2)           | 25(2)           |

|       |         |        |        |        |       |        |
|-------|---------|--------|--------|--------|-------|--------|
| C(35) | 84(3)   | 42(2)  | 38(2)  | 2(1)   | 18(2) | 6(2)   |
| C(36) | 60(2)   | 44(2)  | 45(2)  | 4(1)   | 13(2) | 4(2)   |
| C(37) | 50(2)   | 37(2)  | 42(2)  | 9(1)   | 15(1) | 4(1)   |
| C(40) | 43(2)   | 57(2)  | 51(2)  | -1(2)  | 16(2) | -6(2)  |
| C(41) | 38(2)   | 94(3)  | 63(2)  | 11(2)  | 19(2) | 8(2)   |
| C(42) | 80(3)   | 144(5) | 123(5) | -9(4)  | 29(3) | 54(3)  |
| C(43) | 36(2)   | 45(2)  | 44(2)  | -1(1)  | 16(1) | -2(1)  |
| C(44) | 41(2)   | 41(2)  | 49(2)  | -1(1)  | 23(2) | -3(1)  |
| C(45) | 40(2)   | 56(2)  | 44(2)  | -4(2)  | 18(2) | -15(2) |
| C(46) | 48(2)   | 56(2)  | 37(2)  | -4(1)  | 16(2) | -8(2)  |
| C(51) | 29(2)   | 110(3) | 48(2)  | -24(2) | 17(2) | -6(2)  |
| C(52) | 34(2)   | 107(3) | 59(2)  | -32(2) | 11(2) | 7(2)   |
| C(53) | 36(2)   | 71(2)  | 50(2)  | -10(2) | 12(2) | 4(2)   |
| C(54) | 37(2)   | 45(2)  | 44(2)  | 0(1)   | 13(1) | 3(1)   |
| C(55) | 36(2)   | 46(2)  | 50(2)  | 4(1)   | 16(1) | 4(1)   |
| C(56) | 48(2)   | 47(2)  | 41(2)  | 0(1)   | 10(2) | 11(1)  |
| C(57) | 86(3)   | 46(2)  | 43(2)  | 3(2)   | 15(2) | 5(2)   |
| C(58) | 78(3)   | 57(2)  | 42(2)  | 2(2)   | 20(2) | -12(2) |
| C(59) | 66(2)   | 76(2)  | 43(2)  | 2(2)   | 10(2) | 40(2)  |
| C(60) | 40(2)   | 110(3) | 65(3)  | -13(2) | 19(2) | 10(2)  |
| N(1)  | 75(2)   | 47(2)  | 39(2)  | 6(1)   | 16(1) | 22(1)  |
| N(2)  | 66(2)   | 44(2)  | 50(2)  | -10(1) | 0(2)  | 19(1)  |
| N(3)  | 35(1)   | 59(2)  | 35(1)  | -2(1)  | 4(1)  | 6(1)   |
| N(4)  | 36(2)   | 68(2)  | 49(2)  | 3(1)   | 17(1) | 0(1)   |
| N(5)  | 41(1)   | 45(1)  | 40(1)  | 5(1)   | 15(1) | 9(1)   |
| N(6)  | 45(2)   | 41(1)  | 42(1)  | -1(1)  | 17(1) | 0(1)   |
| N(7)  | 55(2)   | 49(2)  | 44(2)  | 0(1)   | 17(1) | -12(1) |
| O(3)  | 52(2)   | 85(2)  | 64(2)  | -21(1) | 23(1) | -8(1)  |
| O(6)  | 70(2)   | 101(2) | 134(3) | 7(2)   | 44(2) | 5(2)   |
| C(8)  | 106(11) | 55(3)  | 51(3)  | 10(2)  | 52(6) | 43(6)  |
| C(9)  | 78(4)   | 70(4)  | 82(4)  | 27(3)  | 37(3) | -2(3)  |
| O(1)  | 68(2)   | 50(2)  | 59(2)  | 13(2)  | 30(2) | -2(2)  |
| O(2)  | 89(3)   | 81(3)  | 88(4)  | 33(3)  | 39(3) | 6(3)   |
| C(8') | 106(11) | 55(3)  | 51(3)  | 10(2)  | 52(6) | 43(6)  |
| C(9') | 78(4)   | 70(4)  | 82(4)  | 27(3)  | 37(3) | -2(3)  |
| O(1') | 68(2)   | 50(2)  | 59(2)  | 13(2)  | 30(2) | -2(2)  |
| O(2') | 89(3)   | 81(3)  | 88(4)  | 33(3)  | 39(3) | 6(3)   |



|        |       |       |       |       |       |       |
|--------|-------|-------|-------|-------|-------|-------|
| C(38)  | 62(6) | 40(6) | 47(3) | 5(4)  | 29(4) | -2(4) |
| C(39)  | 82(6) | 81(4) | 53(5) | 1(4)  | 41(5) | 8(6)  |
| O(4)   | 63(5) | 64(2) | 44(3) | -3(2) | 26(3) | 2(4)  |
| O(5)   | 65(4) | 69(5) | 55(3) | 4(4)  | 33(3) | 13(3) |
| C(38') | 62(6) | 40(6) | 47(3) | 5(4)  | 29(4) | -2(4) |
| C(39') | 82(6) | 81(4) | 53(5) | 1(4)  | 41(5) | 8(6)  |
| O(4')  | 63(5) | 64(2) | 44(3) | -3(2) | 26(3) | 2(4)  |
| O(5')  | 65(4) | 69(5) | 55(3) | 4(4)  | 33(3) | 13(3) |
| N(8)   | 34(2) | 39(3) | 35(2) | 10(2) | 14(2) | 9(2)  |
| C(47)  | 37(3) | 30(5) | 38(3) | 5(3)  | 13(2) | -4(3) |
| C(48)  | 41(3) | 46(5) | 38(3) | 5(3)  | 13(2) | -1(3) |
| C(49)  | 41(2) | 48(3) | 39(3) | 2(2)  | 20(2) | 3(3)  |
| C(50)  | 35(2) | 48(3) | 43(3) | 3(2)  | 16(2) | 5(3)  |
| N(8')  | 34(2) | 39(3) | 35(2) | 10(2) | 14(2) | 9(2)  |
| C(47') | 37(3) | 30(5) | 38(3) | 5(3)  | 13(2) | -4(3) |
| C(48') | 41(3) | 46(5) | 38(3) | 5(3)  | 13(2) | -1(3) |
| C(49') | 41(2) | 48(3) | 39(3) | 2(2)  | 20(2) | 3(3)  |
| C(50') | 35(2) | 48(3) | 43(3) | 3(2)  | 16(2) | 5(3)  |

---

Table 5. Hydrogen coordinates ( $\times 10^4$ ) and isotropic displacement parameters ( $\text{\AA}^2 \times 10^{-3}$ ) for 101119LTs.

|        | x     | y    | z    | U(eq) |
|--------|-------|------|------|-------|
| H(3)   | 3131  | 4507 | 739  | 88    |
| H(5)   | 1257  | 6560 | 614  | 115   |
| H(6)   | -27   | 5945 | 1150 | 105   |
| H(10A) | -1132 | 4072 | 1932 | 95    |
| H(10B) | -1253 | 4863 | 1493 | 95    |
| H(11A) | 196   | 5827 | 2779 | 104   |
| H(11B) | -842  | 5459 | 3031 | 104   |
| H(12A) | -465  | 4753 | 4057 | 139   |
| H(12B) | 645   | 4258 | 4264 | 139   |
| H(12C) | -399  | 3874 | 3331 | 139   |
| H(14)  | -1218 | 2558 | 1180 | 71    |
| H(15)  | -1607 | 1439 | 1761 | 69    |
| H(17)  | -1989 | 610  | 2669 | 84    |
| H(18)  | -1581 | -390 | 3593 | 90    |
| H(19)  | 618   | -221 | 4327 | 81    |
| H(23)  | 2122  | 3061 | 2859 | 57    |
| H(24A) | 2516  | 1477 | 5157 | 62    |
| H(24B) | 2591  | 440  | 4783 | 62    |
| H(25A) | 4146  | 1899 | 4854 | 58    |
| H(25B) | 4475  | 1233 | 5435 | 58    |
| H(26)  | 4278  | 46   | 4179 | 55    |
| H(27A) | 3785  | 201  | 2763 | 56    |
| H(27B) | 3689  | 1233 | 3137 | 56    |
| H(28A) | 2167  | -238 | 3082 | 58    |
| H(28B) | 1815  | 403  | 2476 | 58    |
| H(29A) | 5739  | 1566 | 4274 | 63    |
| H(29B) | 6094  | 976  | 4928 | 63    |
| H(30A) | 6008  | -258 | 3704 | 100   |
| H(30B) | 6966  | 564  | 3881 | 100   |
| H(30C) | 5745  | 379  | 3088 | 100   |
| H(33)  | 6818  | 6196 | 4879 | 61    |

|        |       |      |       |     |
|--------|-------|------|-------|-----|
| H(35)  | 3837  | 4831 | 2894  | 69  |
| H(36)  | 2748  | 5308 | 3798  | 64  |
| H(40A) | 2612  | 6406 | 6164  | 66  |
| H(40B) | 2265  | 5643 | 5229  | 66  |
| H(41A) | 2214  | 7483 | 5345  | 81  |
| H(41B) | 1664  | 6646 | 4458  | 81  |
| H(42A) | 364   | 7962 | 5185  | 190 |
| H(42B) | -702  | 7249 | 5054  | 190 |
| H(42C) | -193  | 7162 | 4274  | 190 |
| H(44)  | 6302  | 6941 | 7784  | 54  |
| H(52)  | 3557  | 8717 | 8314  | 97  |
| H(53)  | 3341  | 7949 | 6854  | 72  |
| H(54A) | 7411  | 9289 | 9669  | 54  |
| H(54B) | 8071  | 9656 | 10720 | 54  |
| H(55A) | 8804  | 8349 | 9519  | 56  |
| H(55B) | 9435  | 9363 | 10012 | 56  |
| H(56)  | 9933  | 9109 | 11397 | 60  |
| H(57A) | 9516  | 7692 | 11513 | 75  |
| H(57B) | 8894  | 7287 | 10460 | 75  |
| H(58A) | 7453  | 7528 | 11073 | 76  |
| H(58B) | 8055  | 8536 | 11627 | 76  |
| H(59A) | 11317 | 8160 | 11297 | 80  |
| H(59B) | 10689 | 7770 | 10246 | 80  |
| H(60A) | 11257 | 9117 | 10077 | 120 |
| H(60B) | 12378 | 8799 | 10649 | 120 |
| H(60C) | 11798 | 9568 | 11130 | 120 |
| H(3A)  | 2520  | 2361 | 4110  | 58  |
| H(7)   | 6973  | 7104 | 9442  | 64  |
| H(9A)  | 4420  | 7097 | 308   | 111 |
| H(9B)  | 3653  | 7872 | 192   | 111 |
| H(9C)  | 3419  | 6983 | -622  | 111 |
| H(9'1) | 5215  | 5899 | -296  | 111 |
| H(9'2) | 6016  | 6208 | 732   | 111 |
| H(9'3) | 5147  | 6838 | 349   | 111 |
| H(39A) | 6247  | 4821 | 1600  | 108 |
| H(39B) | 5334  | 3918 | 1185  | 108 |
| H(39C) | 6494  | 4015 | 2010  | 108 |

|        |      |      |       |     |
|--------|------|------|-------|-----|
| H(39D) | 6711 | 4733 | 1781  | 108 |
| H(39E) | 6110 | 3732 | 1569  | 108 |
| H(39F) | 7243 | 4165 | 2434  | 108 |
| H(48)  | 6383 | 9374 | 11788 | 53  |
| H(49)  | 4453 | 9968 | 11325 | 53  |
| H(50)  | 3617 | 9463 | 9696  | 53  |
| H(48') | 6572 | 9091 | 11910 | 53  |
| H(49') | 4483 | 9399 | 11507 | 53  |
| H(50') | 3552 | 8835 | 9888  | 53  |

---

## Scheme 5. Synthetic scheme for the polymer Polymer Bound

### Benzimidazole Derivatives 6.

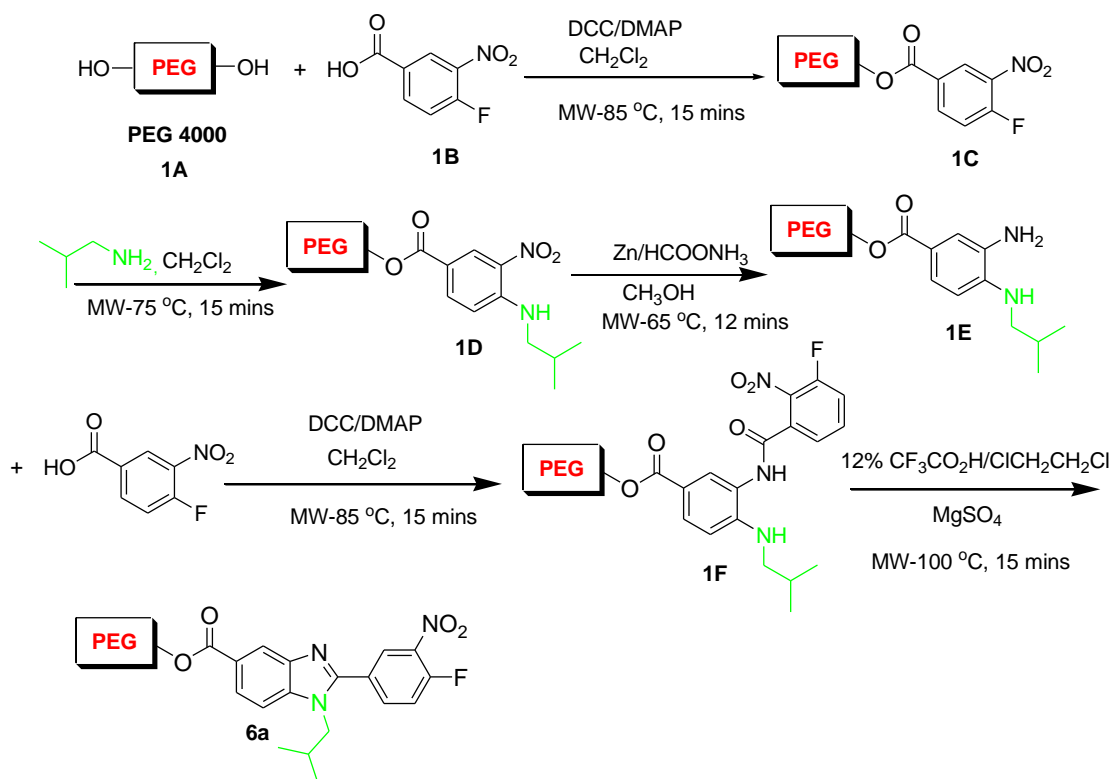

### General Procedure for the Preparation of Polymer Bound Benzimidazole Derivatives 6.

Polyethylene glycol **1A** (PEG 4000) (1.0 g, 0.25 mmol, 1.0 equiv) dissolved in (5 mL) of dichloromethane was added to a solution of 4-fluoro-3-nitrobenzoic acid **1B** (0.11 g, 0.60 mmol, 2.4 equiv) in dichloromethane (5 mL) in the presence of *N,N'*-dicyclohexylcarbodiimide (DCC) (0.144 g, 0.70 mmol, 2.4 equiv) and *N,N'*-dimethylamino pyridine (DMAP) (3 mg). The reaction mixture was stirred at room temperature for 10 mins and subsequently irradiated in sealed microwave biotage vial (10 ml) at  $85^\circ\text{C}$  for 15 mins. After completion of the reaction, the insoluble

dicyclohexyl urea (DCU) was filtered through filter paper. The reaction mixtures were precipitated by slow addition of cold ether and precipitated polymer conjugate **1C** was filtered through fritted funnel. The crude product was washed successively with cold ether (50 mL  $\times$  3) to remove the undesired impurity and dried for further steps. To the polymer conjugate **1C** (1.1 gm, 0.25 mmol, 1.0 equiv) dissolved in (6 mL) of dichloromethane was added isobutyl amine (0.07 gm, 1.01 mmol, 4.0 equiv). The reaction mixture was stirred at room temperature and subsequently irradiated under sealed microwave vial (10 ml) at 75 °C for 15 mins to obtain the polymer bound conjugates **1D**. After completion of the reaction, the reaction mixtures were precipitated by slow addition of cold ether and precipitated polymer conjugate **1D** was filtered through fritted funnel. The crude product was washed successively with ether (50 mL  $\times$  3) to remove the undesired impurity and dried for further steps. Subsequently to the polymer conjugate **1D** (1.2 gm, 0.27 mmol, 1.0 equiv) dissolved in (6 mL) of methanol was added Zn (0.26 gm, 4.05 mmol, 15.0 equiv) and ammonium formate (0.17 gm, 2.70 mmol, 10.0 equiv). The reaction mixture was stirred at room temperature and subsequently irradiated in sealed microwave vial (10 ml) at 65 °C for 12 mins to obtain the polymer bound conjugates **1E**. After completion, the mixtures were filtered with Celite

to remove zinc and the filtrate was collected and concentrated under reduced pressure. Then dichloromethane (25 mL) was added to precipitate ammonium formate, and the mixture was again passed through a thin layer of Celite to remove ammonium formate and dried. Polymer bound *o*-phenylene diamine **1E** (1.0 g, 0.23 mmol, 1.0 equiv) dissolved in (5 mL) of dichloromethane was added to a solution of 4-fluoro-3-nitrobenzoic acid (0.11 g, 0.60 mmol, 2.6 equiv) in dichloromethane (5 mL) in the presence of *N,N'*-dicyclohexylcarbodiimide (DCC) (0.12 g, 0.60 mmol, 2.6 equiv) and *N,N'*-dimethylamino pyridine (DMAP) (2 mg). The reaction mixture was stirred at room temperature and subsequently irradiated in sealed microwave vial (10 ml) for 85 °C 15 mins to obtain the polymer bound amide conjugates **3**. After completion of the reaction, the suspensible dicyclohexyl urea (DCU) was filtered through filter paper. The reaction mixtures were precipitated by slow addition of cold ether and precipitated amide conjugate **1F** was filtered through fritted funnel. The crude product was washed successively with ether (50 mL × 3) to remove the undesired impurity and dried for further steps. To a solution of **1F** in 1, 2-dichloroethane, trifluoroacetic acid (0.5 mL) and MgSO<sub>4</sub> (0.5 g) were added and irradiated under sealed microwave vial (10 ml) 100 °C for 15 mins. After completion of the reaction, MgSO<sub>4</sub> was removed through celite. The reaction mixtures were

precipitated by slow addition of excess of cold ether (100 mL) and filtered through a fritted funnel to obtain the compound **6a** in high purity in quantitative yields



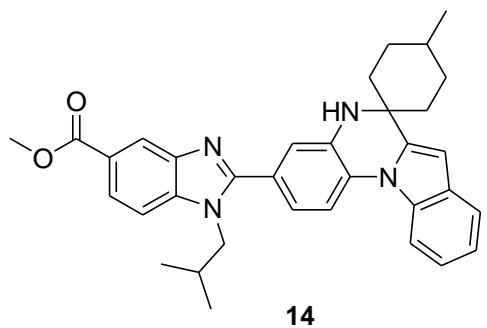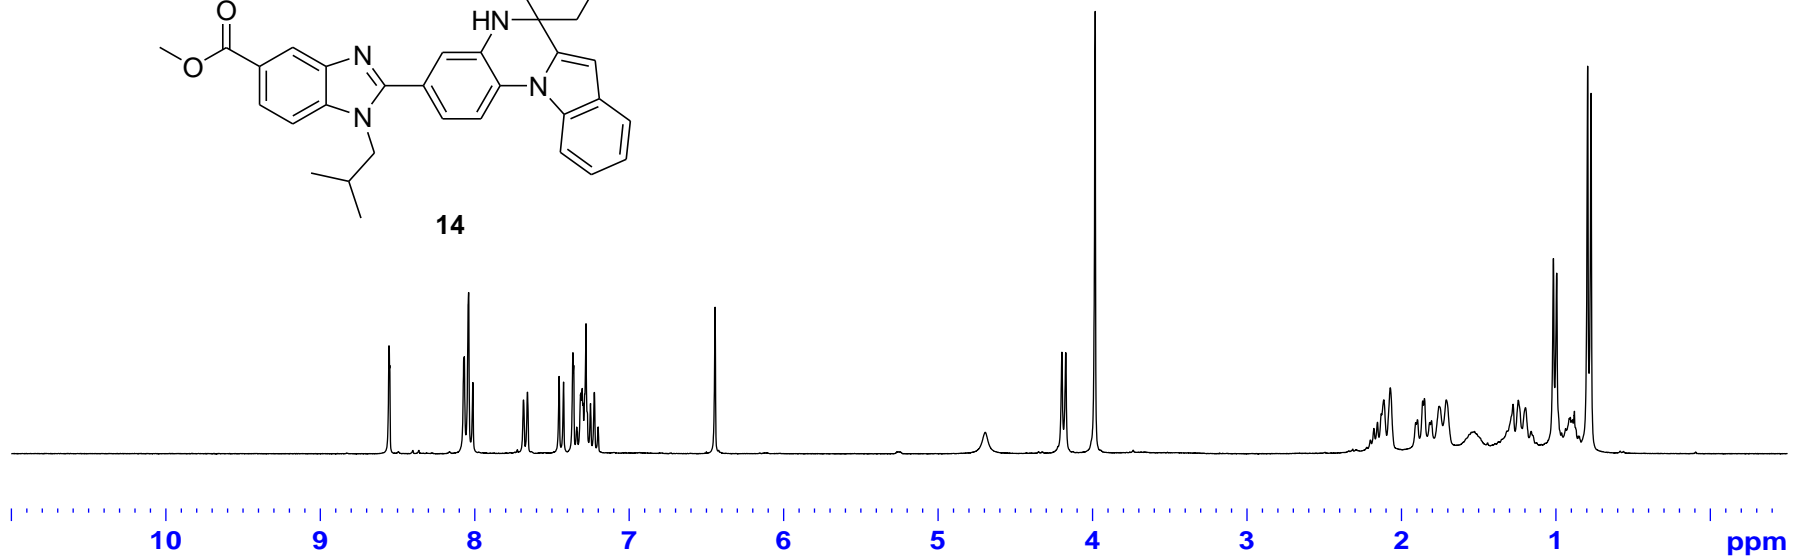

$^1\text{H}$  NMR Spectrum of Compound 14 in  $\text{CDCl}_3$

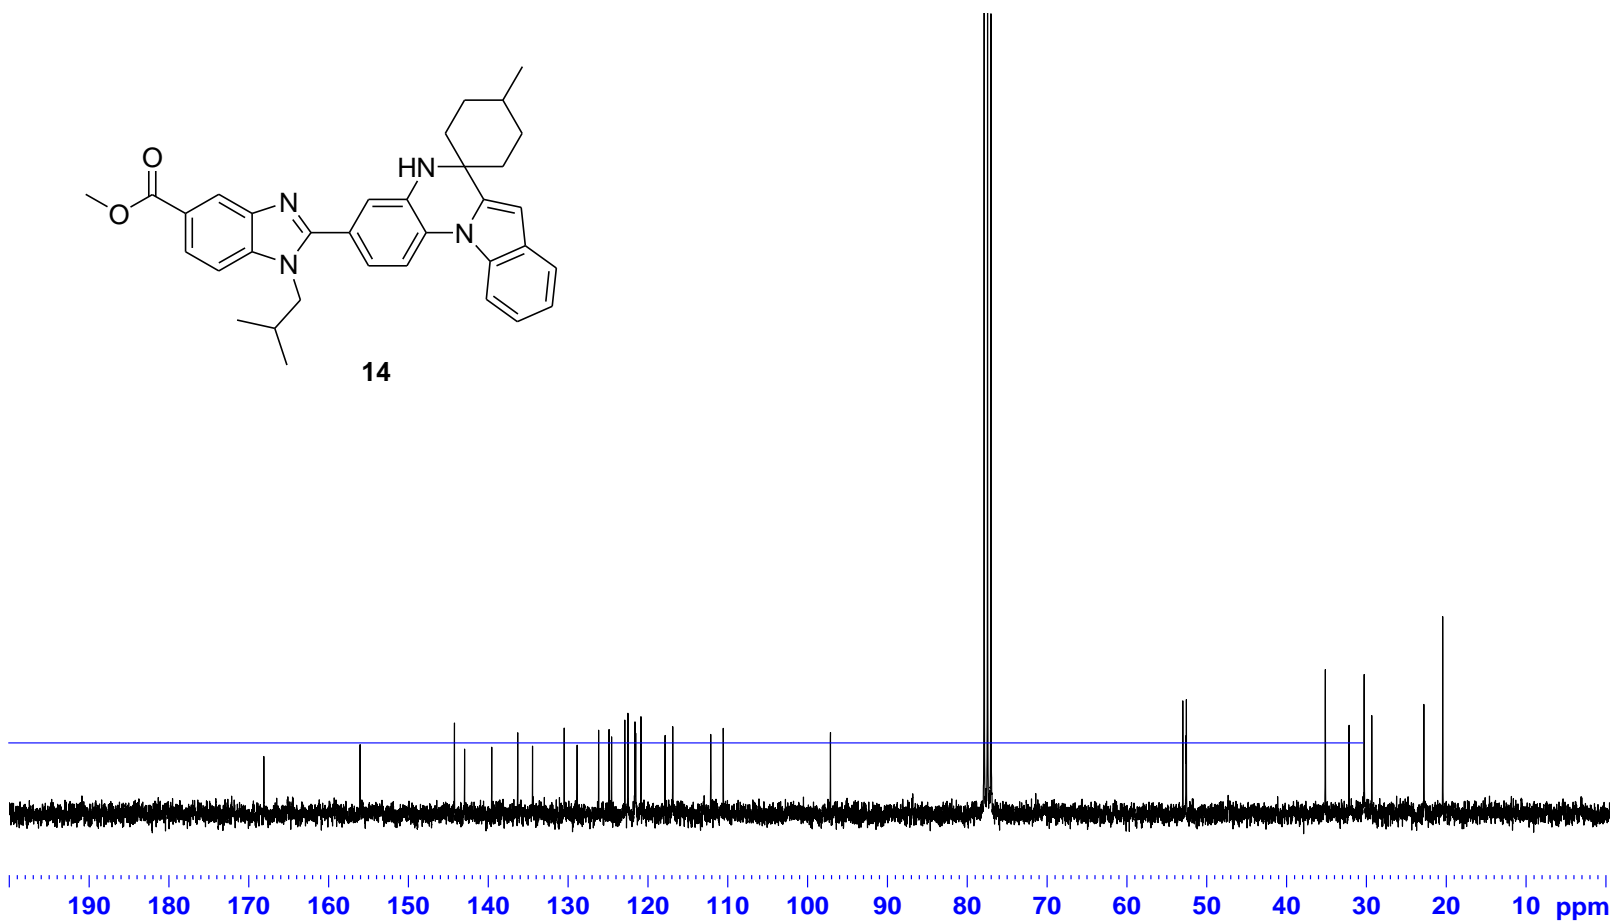

$^{13}\text{C}$  NMR Spectrum of Compound 14 in  $\text{CDCl}_3$

**BM-IQ-1**

2011012813 19 (1.301) Cn (Cen,3, 20.00, Ht); Sm (SG, 2x0.75); Sb (5,40.00); Cm (13:19-5:8x3.000)

Scan ES+  
8.77e6

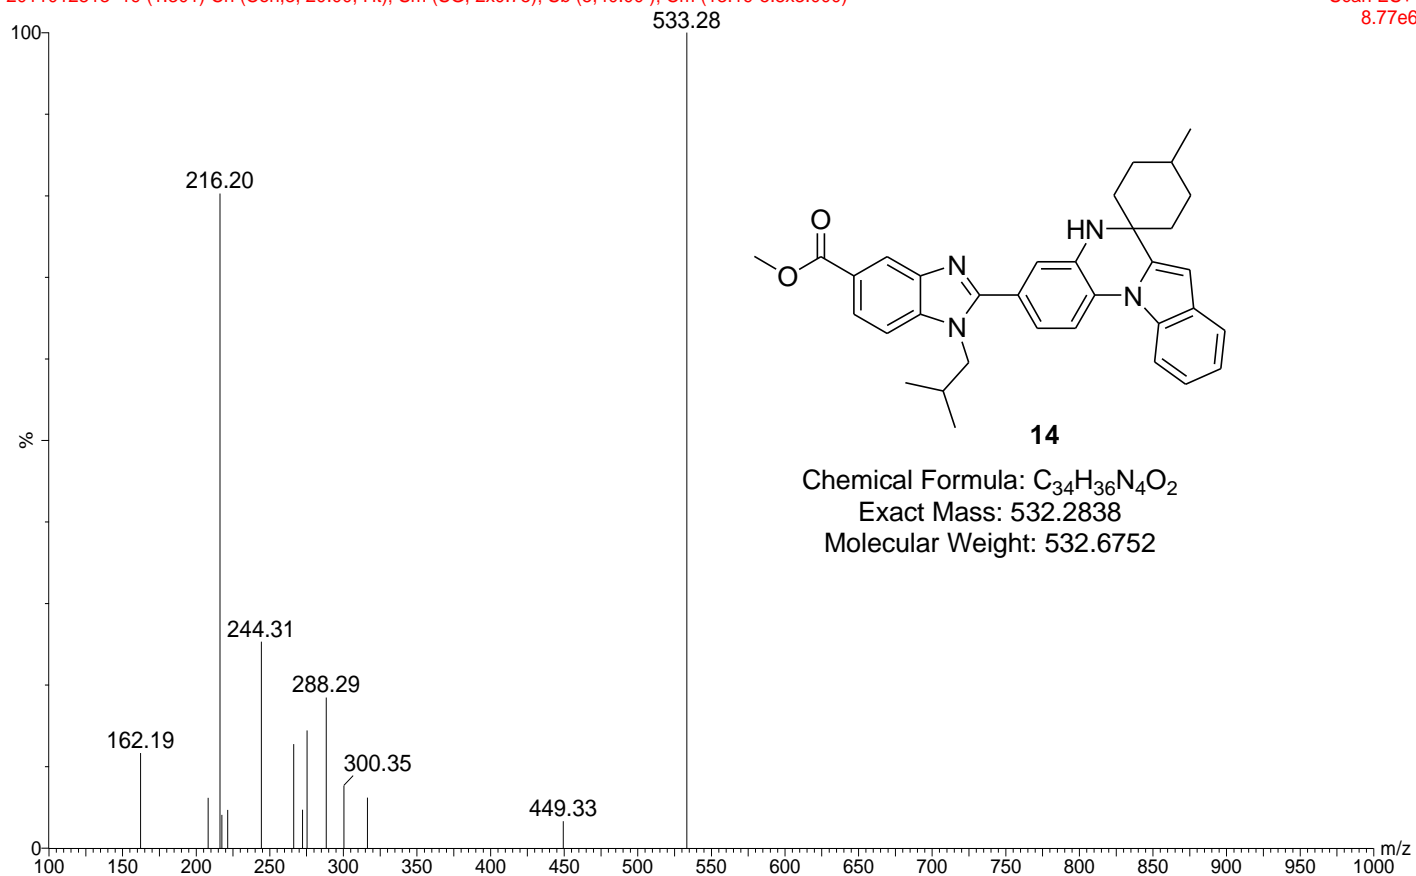

**LR Mass Spectrum of Compound 14**

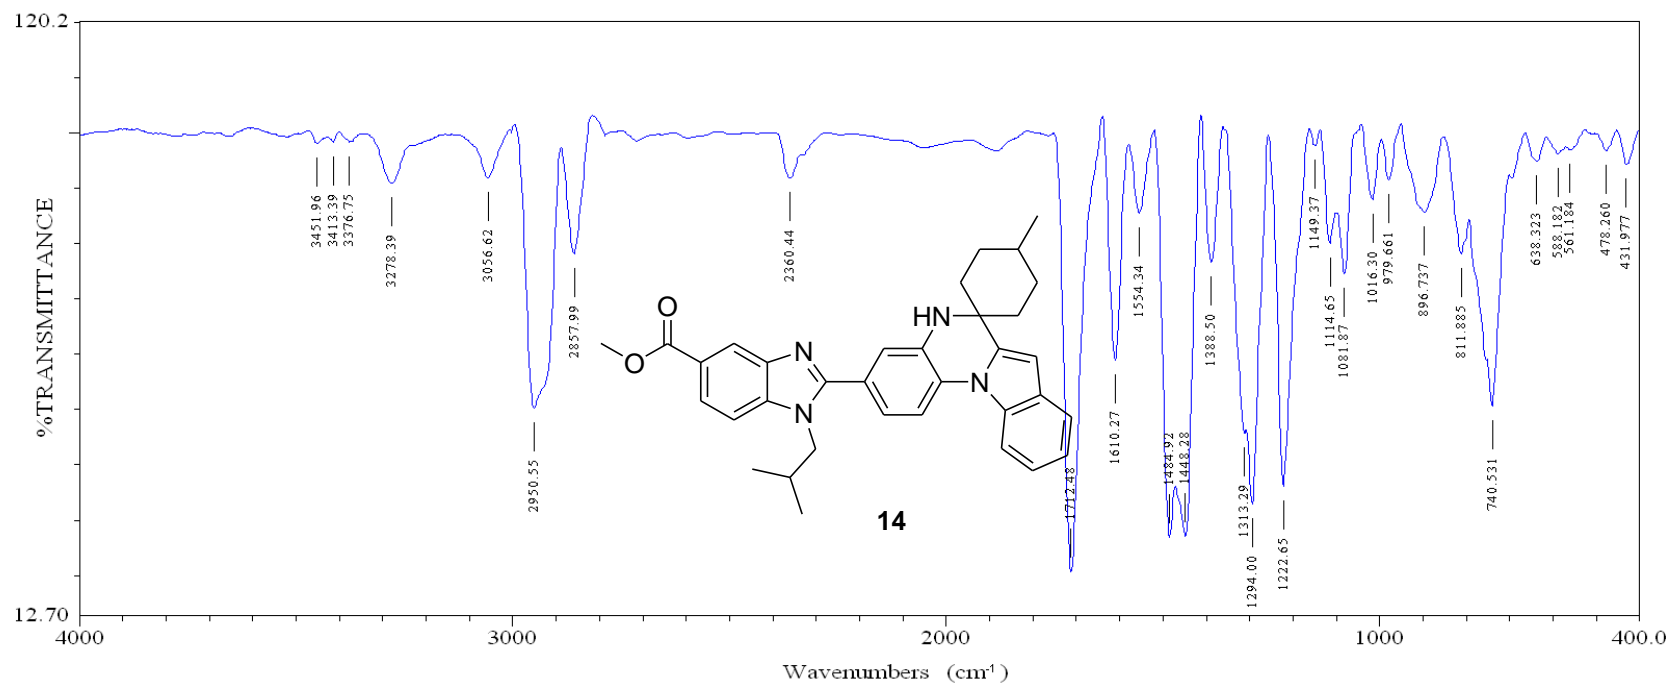

**IR Spectrum of Compound 14**

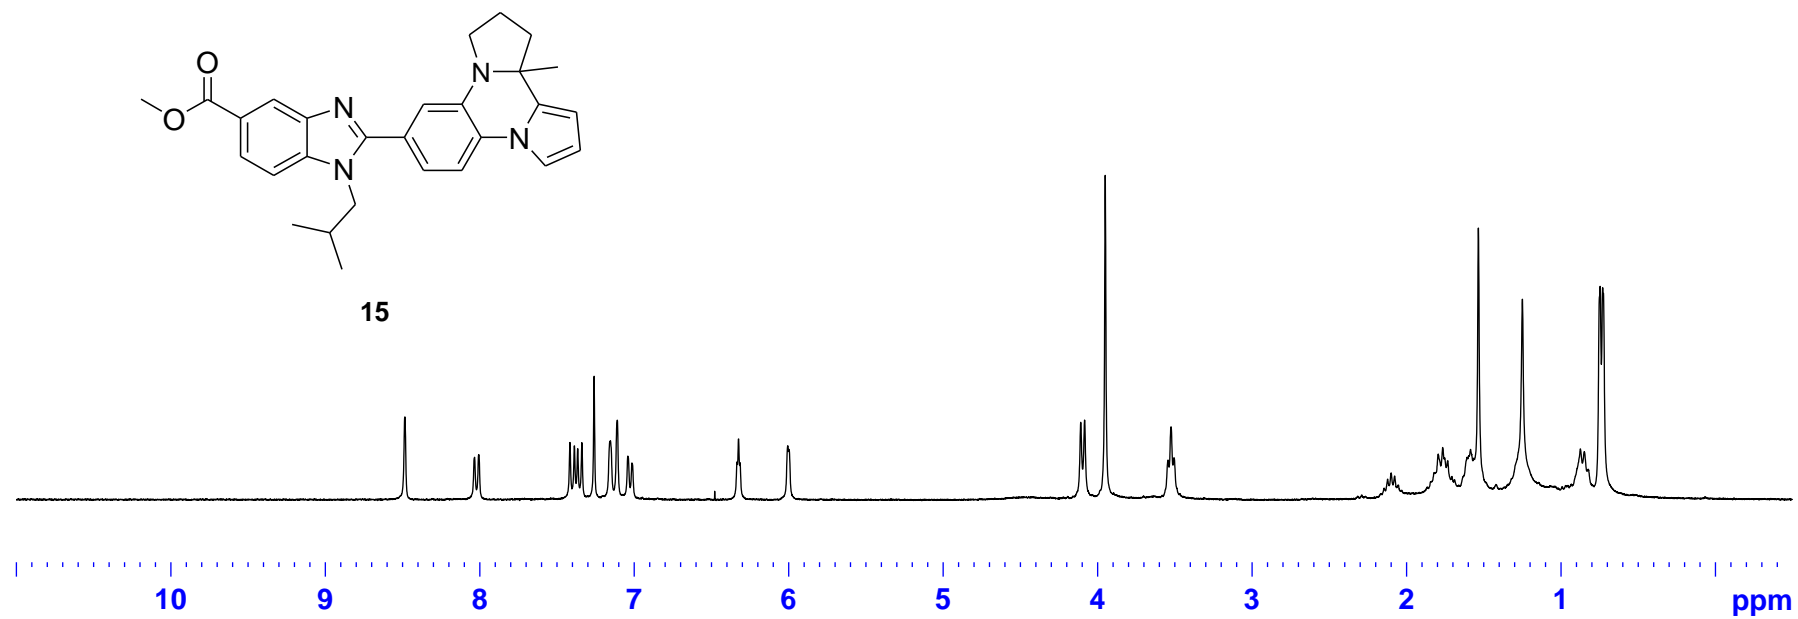

**<sup>1</sup>H NMR Spectrum of Compound 15 in CDCl<sub>3</sub>**

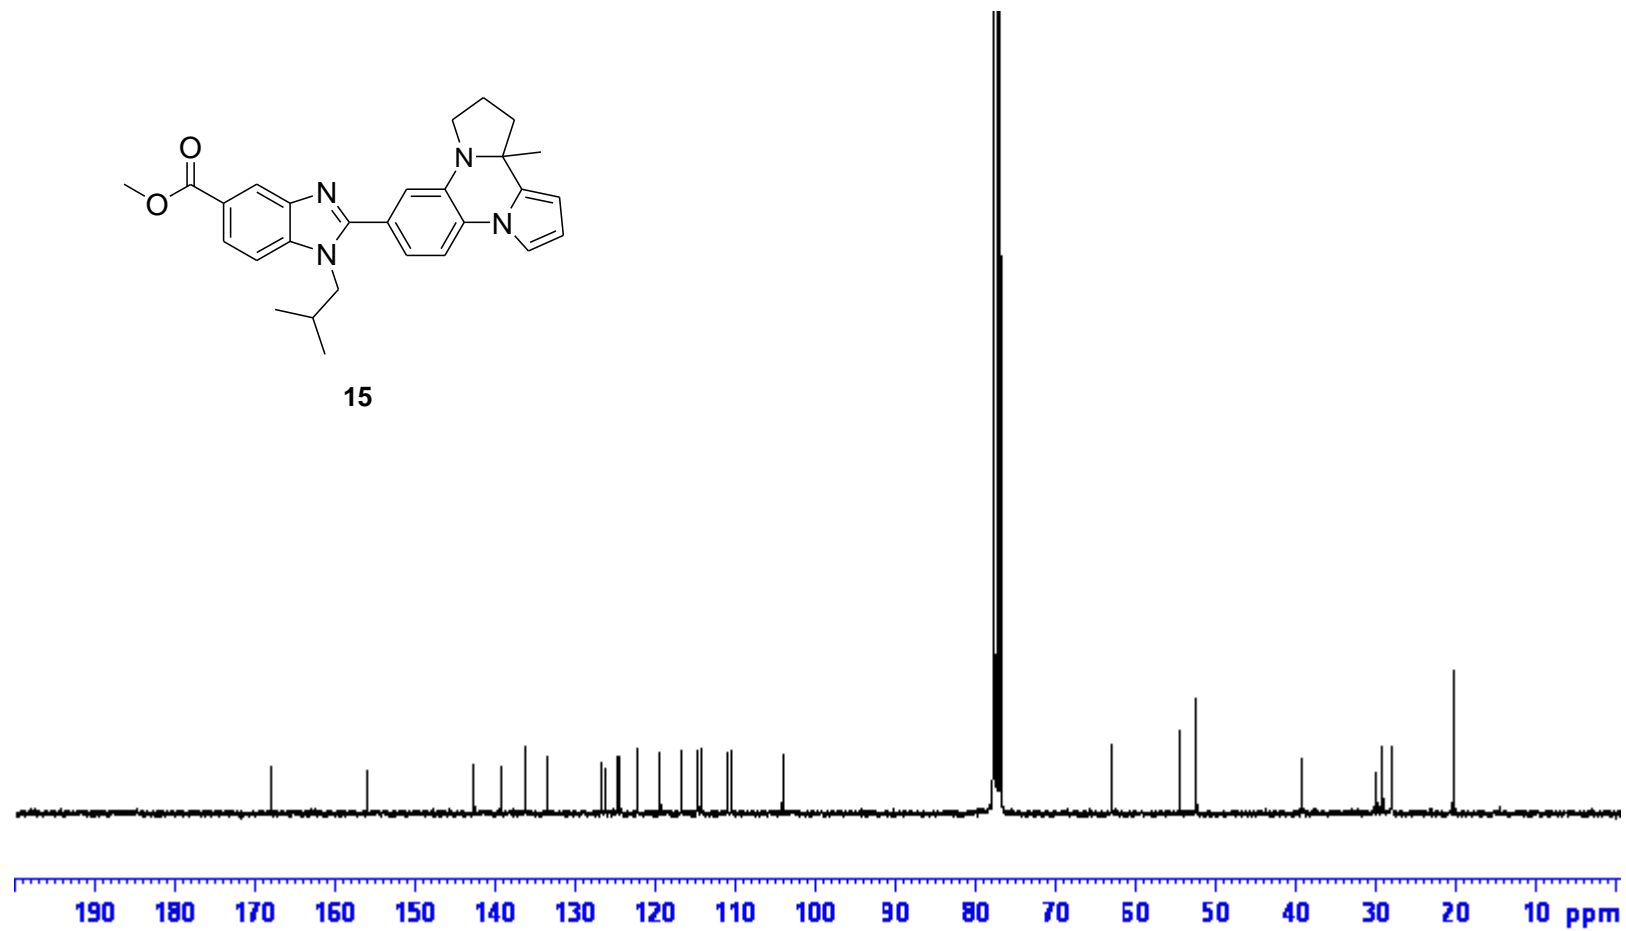

<sup>13</sup>C NMR Spectrum of Compound 14 in CDCl<sub>3</sub>

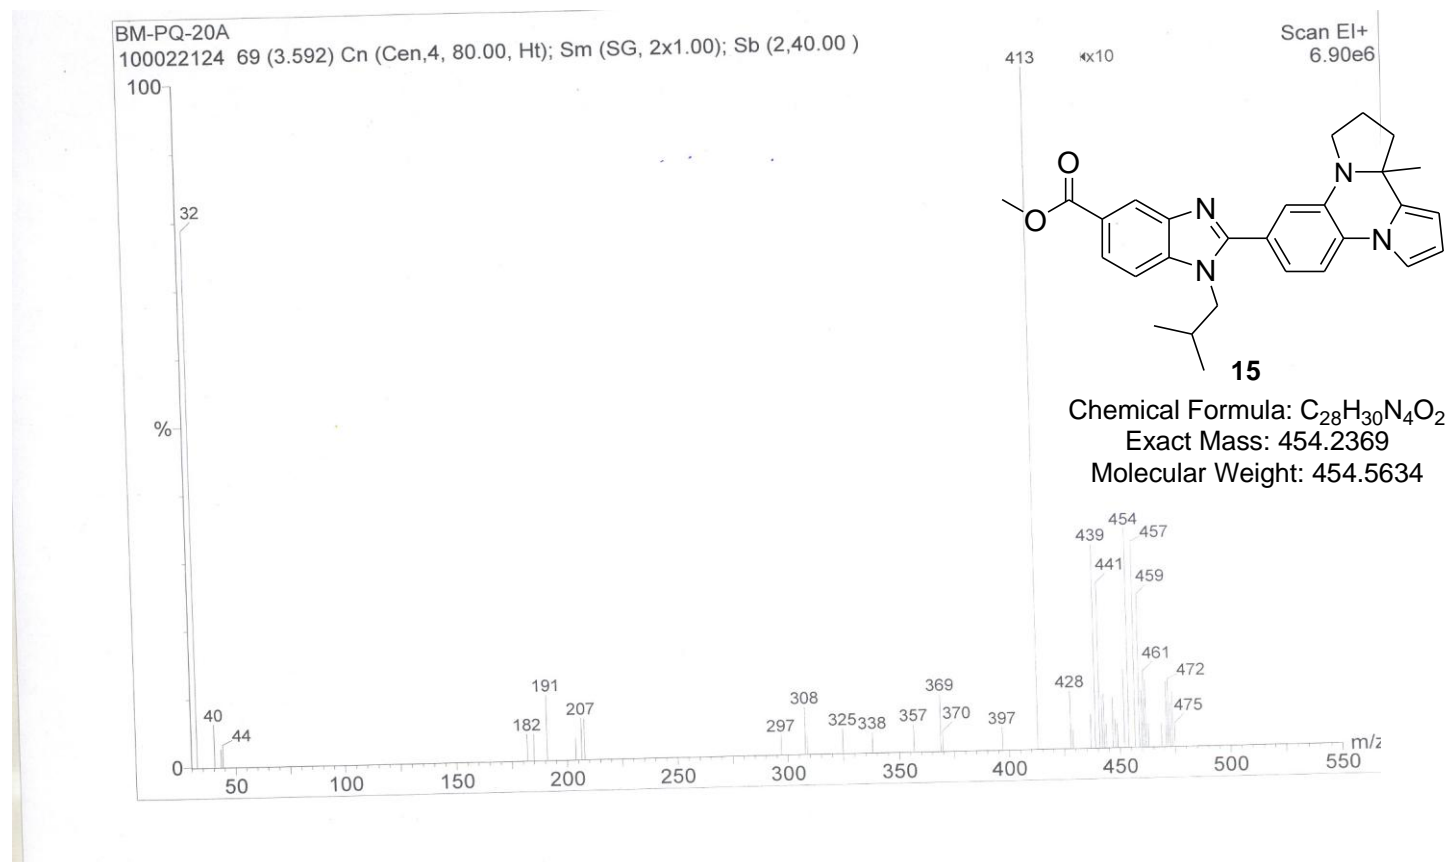

**LR Mass Spectrum of Compound 15 in  $CDCl_3$**

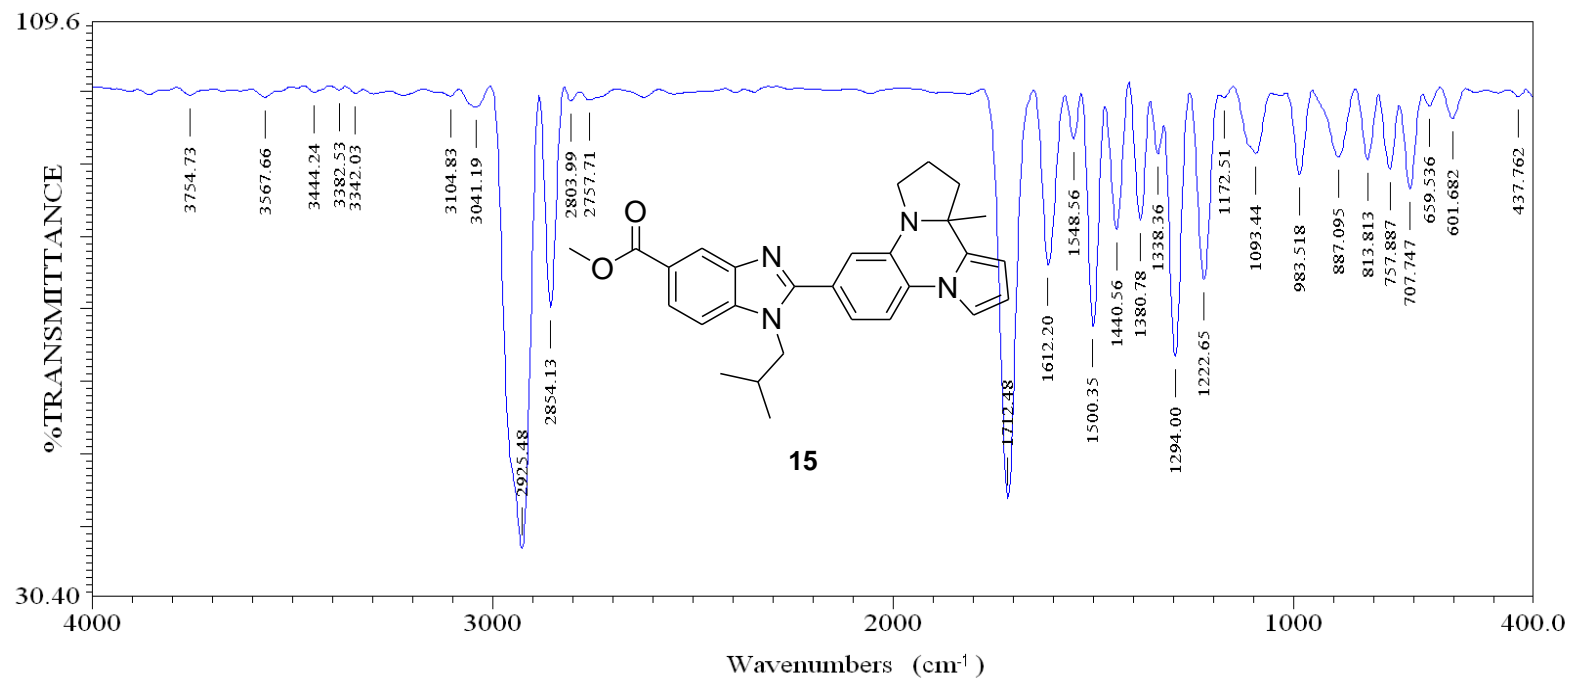

IR Spectrum of Compound 15



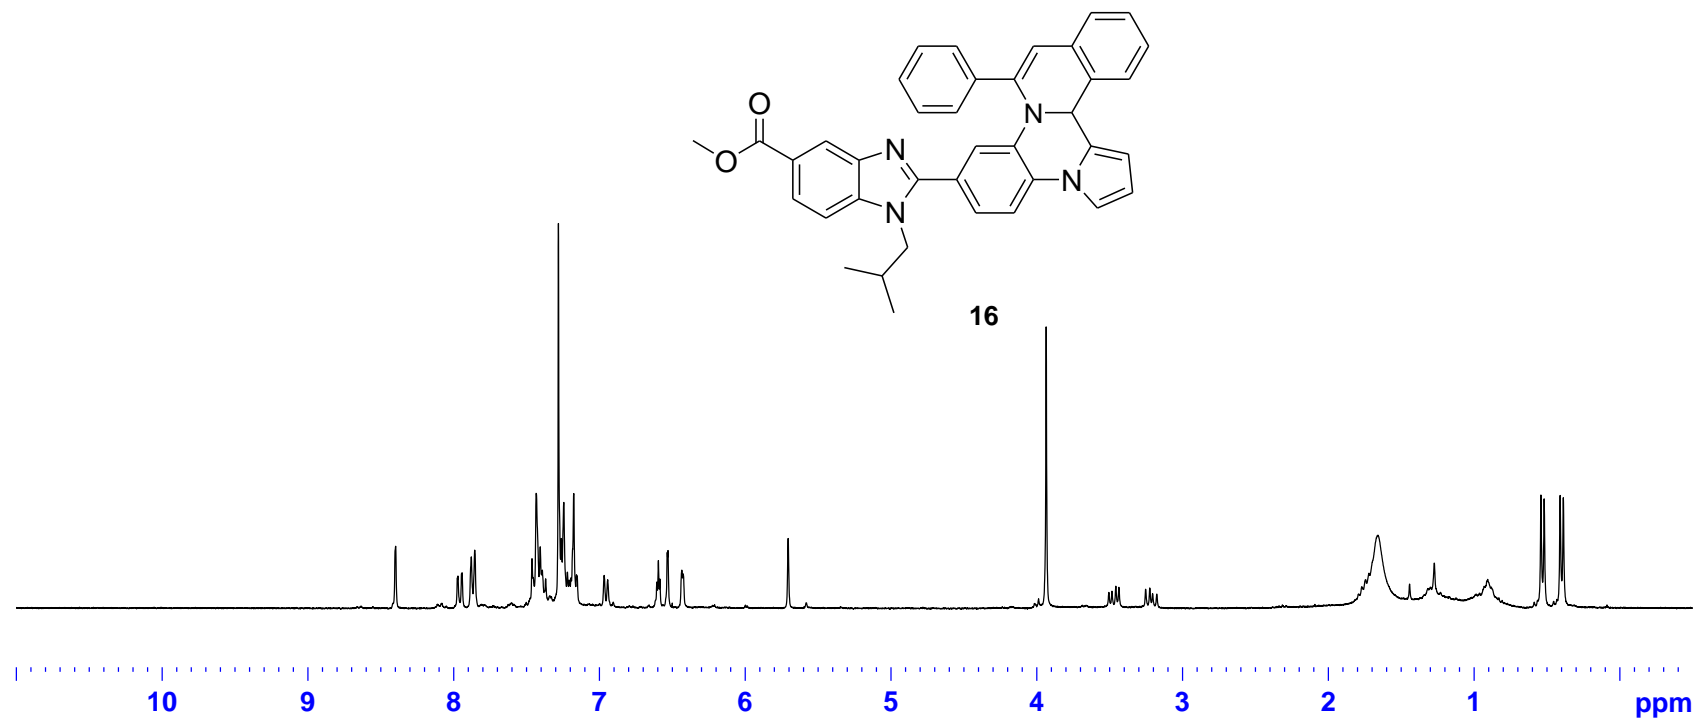

**<sup>1</sup>H NMR Spectrum of Compound 16 in CDCl<sub>3</sub>**

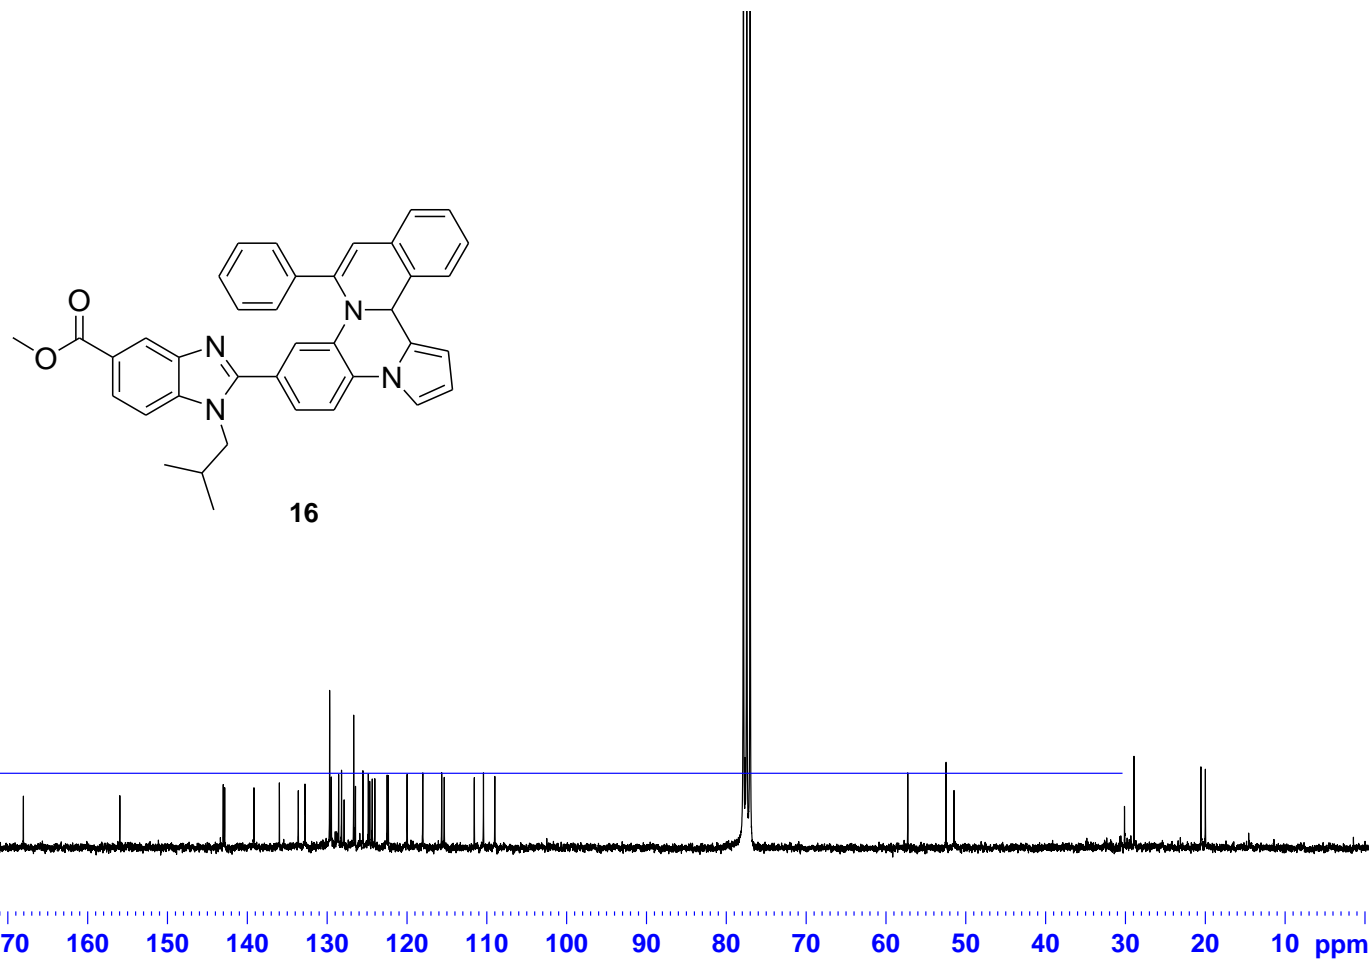

$^{13}\text{C}$  NMR Spectrum of Compound 16 in  $\text{CDCl}_3$

**BM-PQ-21**

2011021111 12 (0.822) Cn (Cen,3, 20.00, Ht); Sm (SG, 2x0.75); Sb (5,40.00 ); Cm (11:12-5:9x3.000)

Scan ES+  
1.31e7

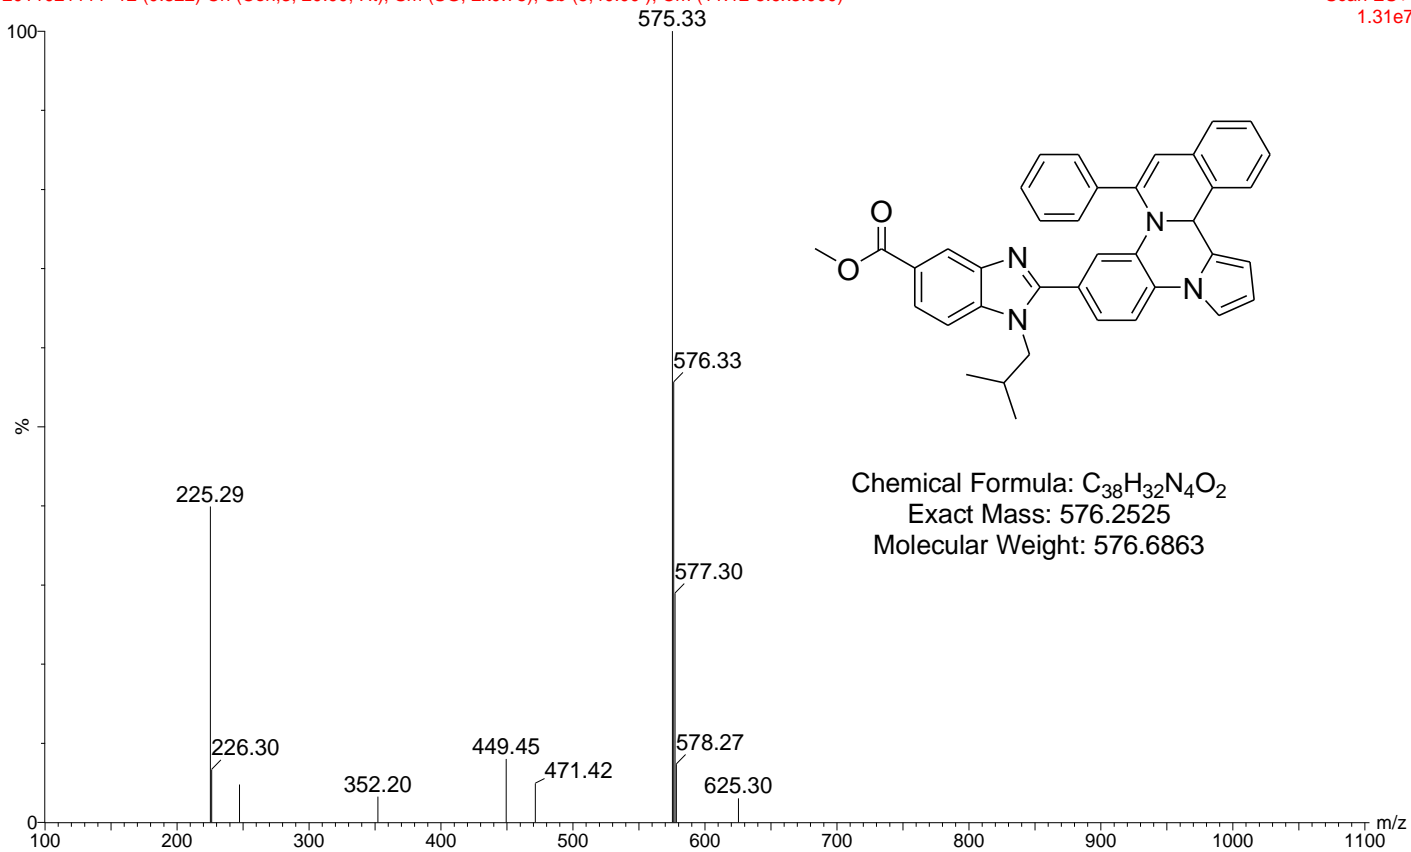

**LR Mass Spectrum of Compound 16 in  $CDCl_3$**

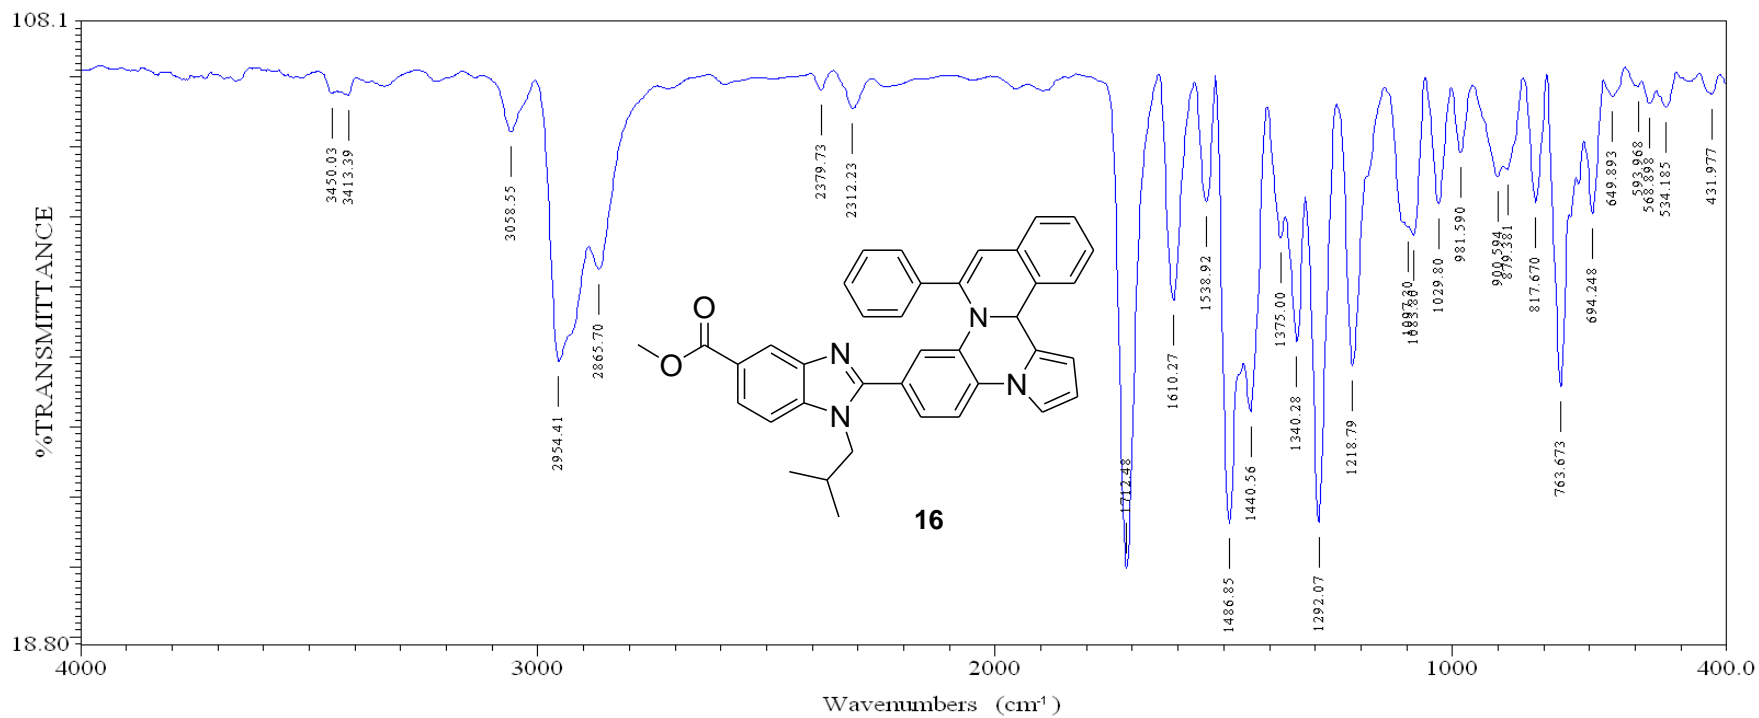

IR Spectrum of Compound 16 in CDCl<sub>3</sub>

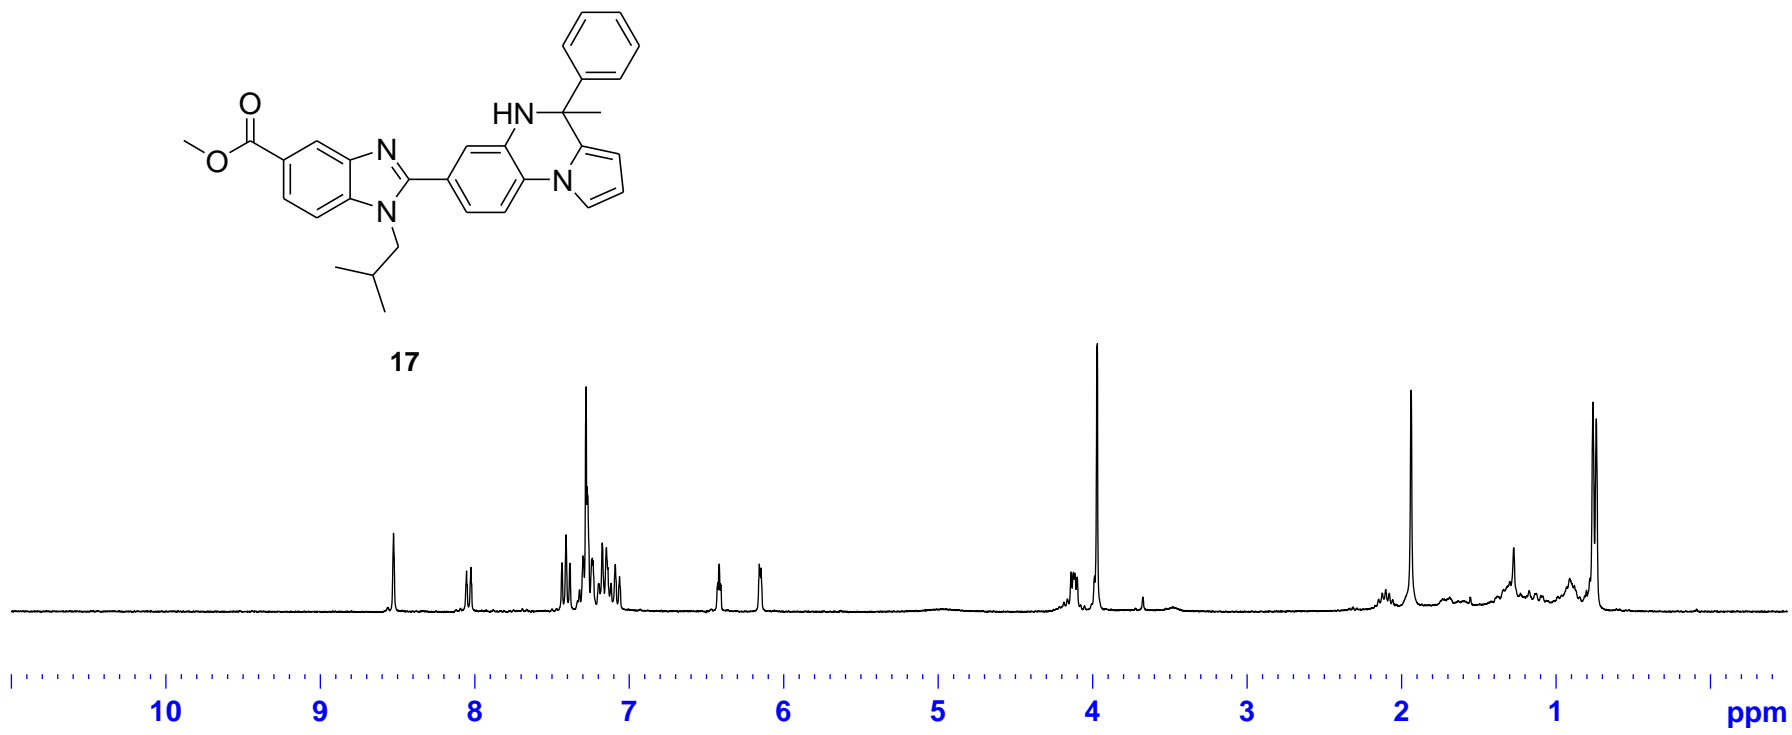

<sup>1</sup>H NMR Spectrum of Compound 17 in CDCl<sub>3</sub>

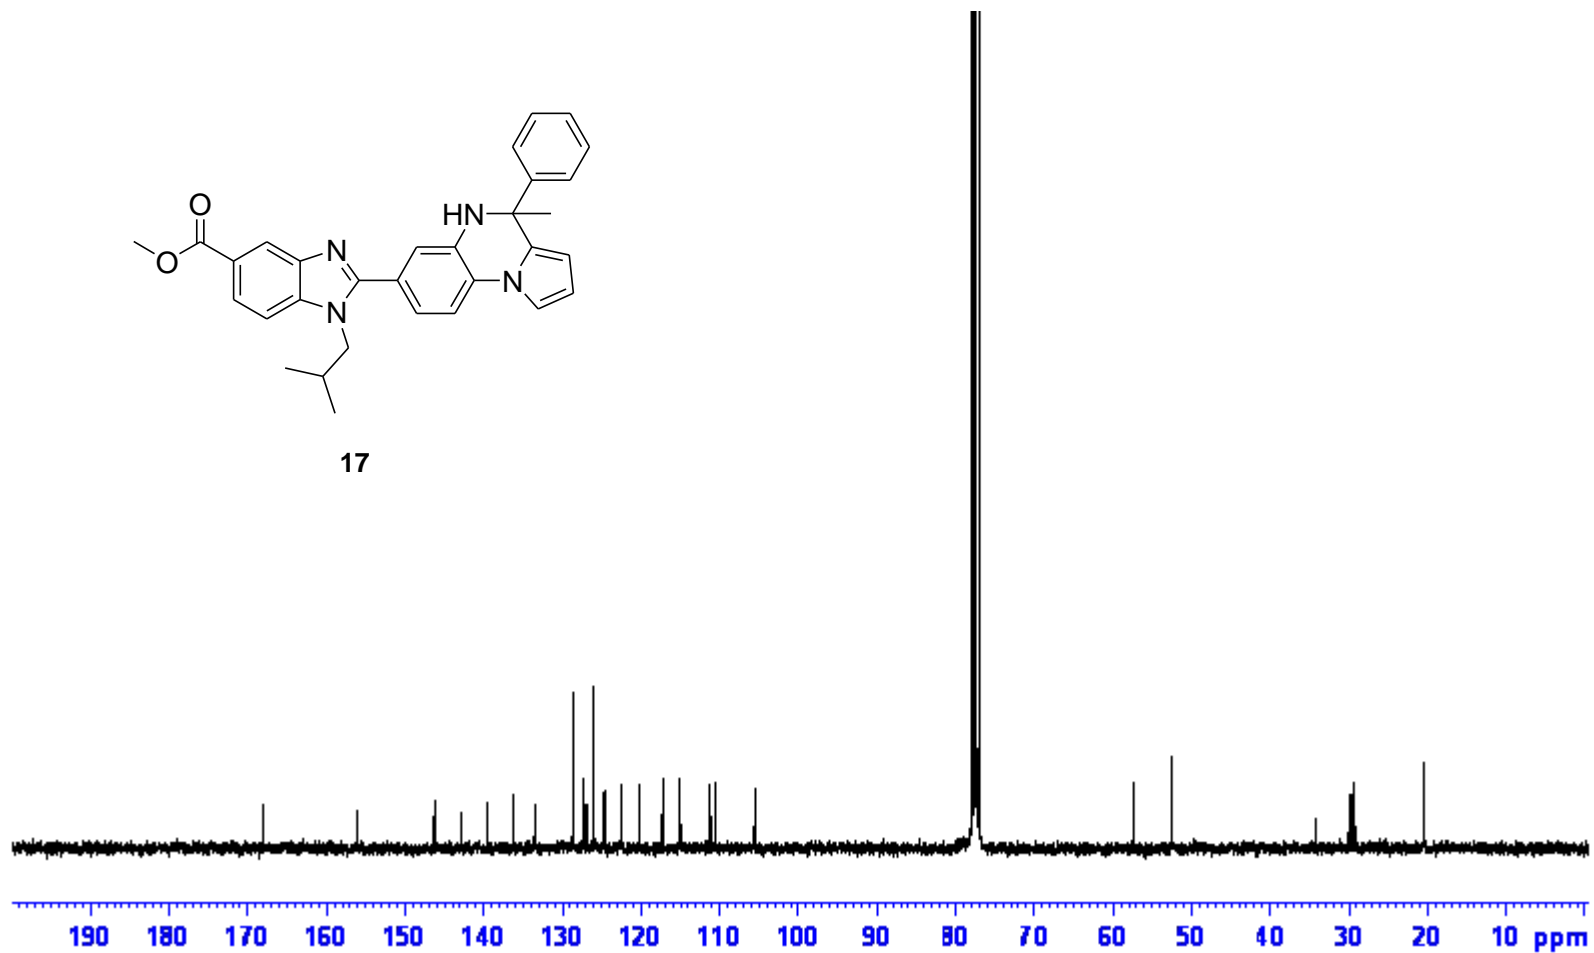

$^{13}\text{C}$  NMR Spectrum of Compound 17 in  $\text{CDCl}_3$

**BM-PQ-22**

2011021112 16 (1.096) Cn (Cen,3, 20.00, Ht); Sm (SG, 2x0.75); Sb (5,40.00 ); Cm (14:18-6:12x3.000)

Scan ES+  
6.03e6

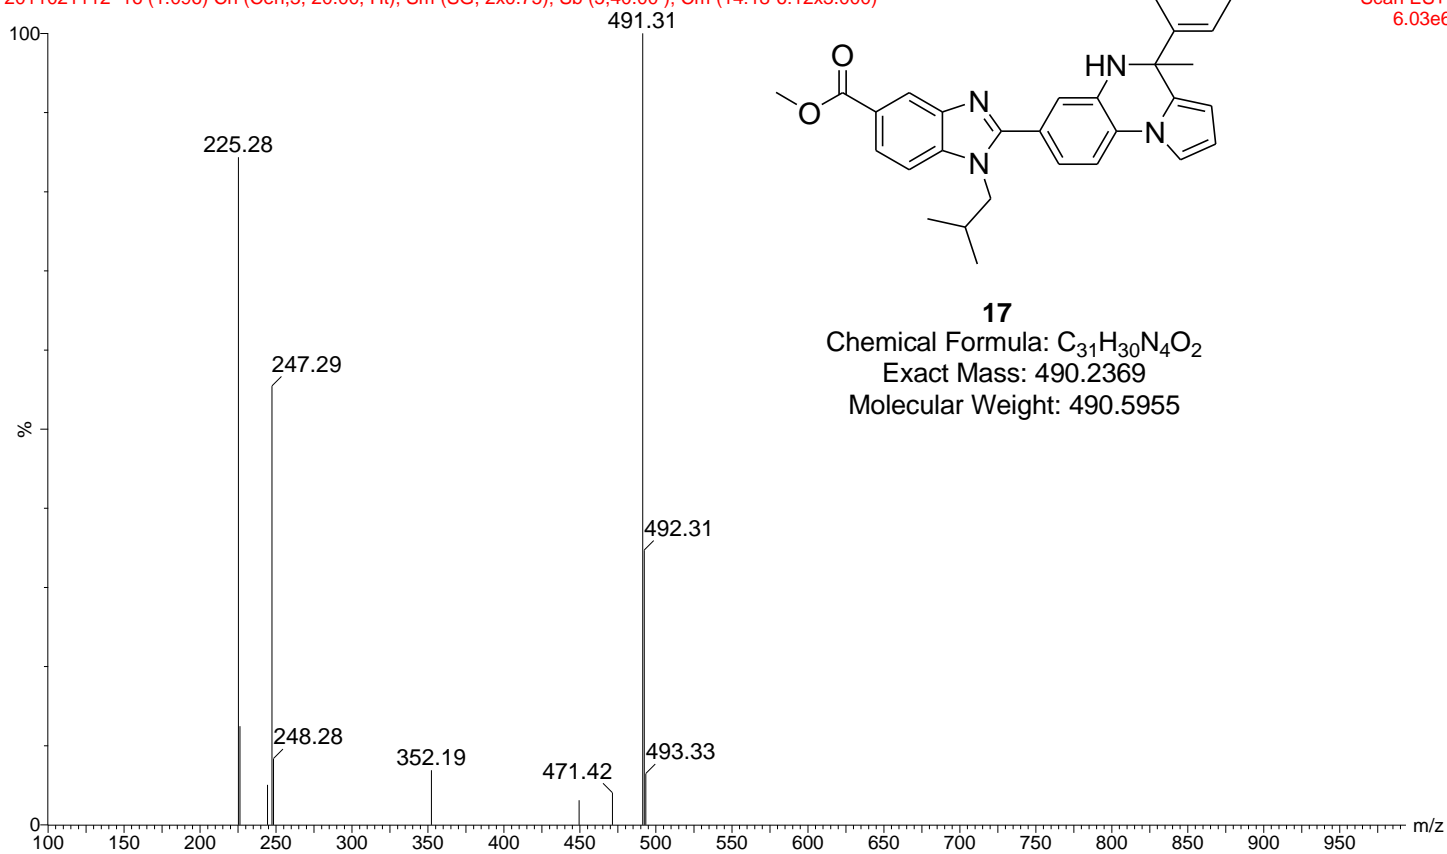

**LR Mass Spectrum of Compound 17 in CDCl<sub>3</sub>**

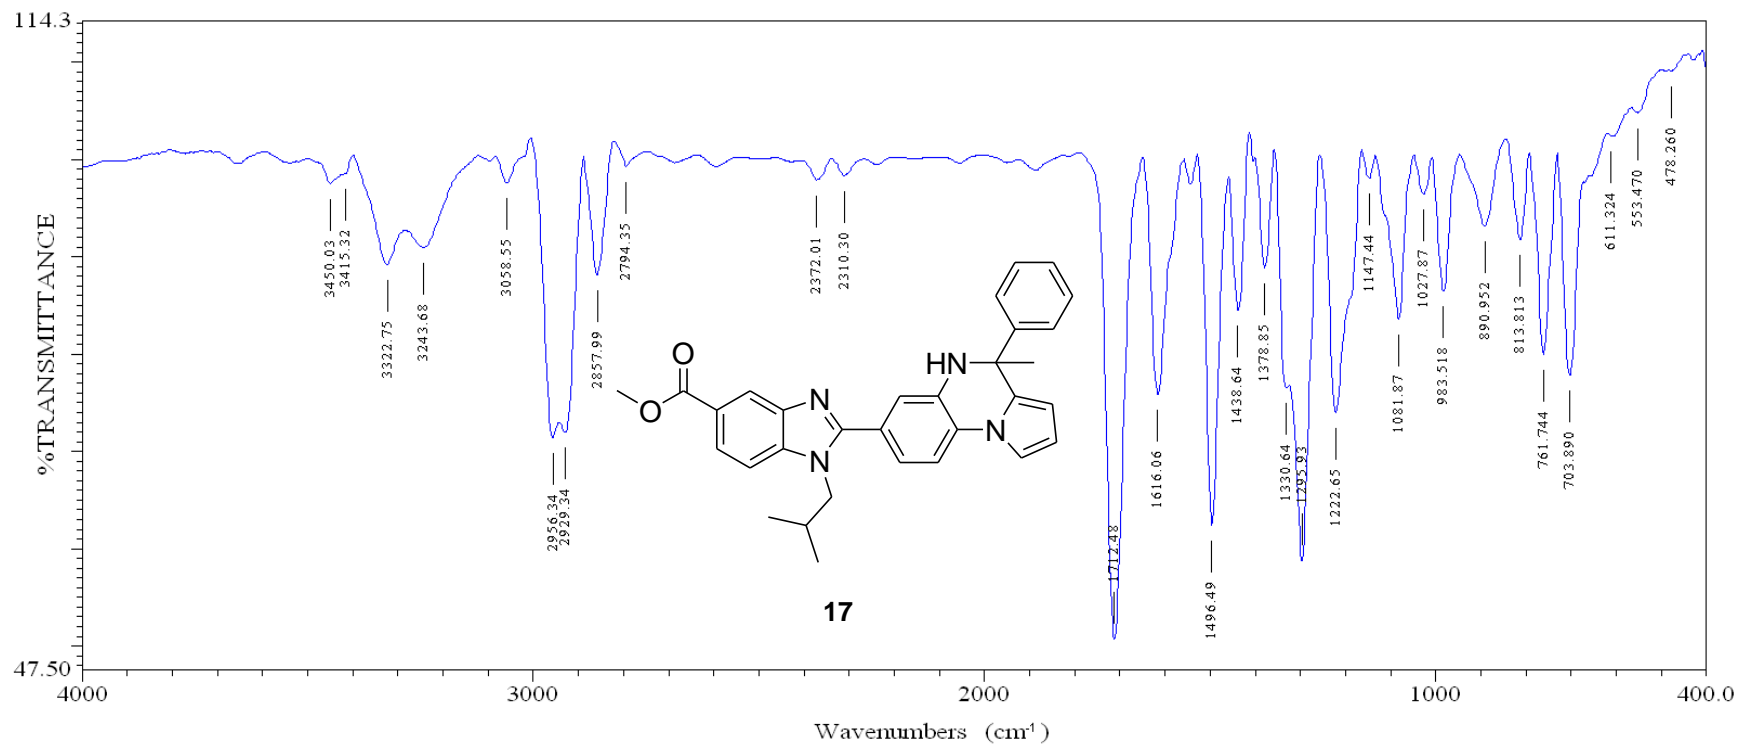

IR Spectrum of Compound 17 in CDCl<sub>3</sub>



## **General Procedure for the Preparation of Polymer Bound**

### **1-isobutyl-2-(3-nitro-4-(1H-indole-1-yl)phenyl)-1H-benzo[d]imidazole-5-carboxyl**

**ate 11.** Indole (0.24 g, 2.14 mmol, 5 equiv) and Cs<sub>2</sub>CO<sub>3</sub> (0.69 g, 2.14 mmol, 5 equiv) was added to the solution of **6a** (2.0 g, 0.43 mmol, 1 equiv) in dimethyl formamide (10 mL) in a 20 mL microwave vial. The vial was sealed and the reaction mixtures were irradiated in a microwave reactor at 135 °C for 10 minutes to obtain the polymer conjugate **11**. After being cooled to room temperature, the reaction mixtures were precipitated by slow addition of cold ether and precipitated pyrrole bound polymer conjugates **11** were filtered through fritted funnel. The crude product was washed in succession with ether (100 mL×3) to remove the undesired impurity and dried for next steps.

## **General Procedure for the Preparation of Polymer Bound**

### **2-(3-amino-4-(1H-indole-1-yl)phenyl)-1-isobutyl**

**-1H-benzo[d]imidazole-5-carboxylate 12.** To a solution of **11** (2.00 g, 0.41 mmol ) in methanol (10 ml), zinc dust (0.53 g, 8.20 mmol, 20.0 equiv) and ammonium formate (0.27 g, 4.10 mmol, and 10.0 equiv) were added in a 20 mL microwave vial. The vial was sealed and the reaction mixtures were irradiated in a microwave reactor at 60 °C for 10 minutes. After being cooled to ambient temperature, the reaction

mixtures were then subjected to centrifugation for removal of Zn and filtered through fritted funnel and the supernatant liquid was concentrated by rotary evaporation. Dichloromethane (10 mL) was then added to salt out ammonium formate. The reaction mixtures were filtered through fritted funnel again to remove ammonium formate to obtain the polymer bound 2-(3-amino-4-(1H-indole-1-yl)phenyl)-1-isobutyl-1H-benzo[d]imidazole-5-carboxylate **12**.

#### **General Procedure for the Preparation of Polymer Bound**

**2-(4,4-dialkyl-4,5-dihydropyrrolo[1,2-a]quinoxalin-7-yl)-1-methyl-1H-benzo[d]imidazole-5-carboxylate **13**.** To a stirred solution of polymer bound 2-(3-amino-4-(1H-indole-1-yl)phenyl)-1-isobutyl-1H-benzo[d]imidazole-5-carboxylate conjugates **12** in CHCl<sub>3</sub> (10 mL), 4-methylcyclohexanone (1.05 mmol, 5.0 equiv), trifluoro acetic acid (TFA) 0.05 ml and MgSO<sub>4</sub> (20 mg) were added in 20 mL microwave vial. The vial was sealed and the reaction mixtures were irradiated in a microwave reactor at 85 °C for 12 minutes. After cooling to room temperature, the crude product mixtures were purified by precipitation with cold ether (100 mL×3) and dried to obtain the conjugate **13** in high purity.

### **General Procedure for the Cleavage of Polymer Bound Substituted alkyl**

#### **2-(4,4-alkyl-4,5-dihydropyrrolo[1,2-a]quinoxalin-7-yl)-1-methyl-1H-benzo[d]imi**

#### **dazole-5-carboxylate 14.** To a solution of conjugates **13** in methanol (20 mL),

KCN (100 mg) was added and stirred for 24 hours at room temperature. After

completion of the reaction, excess of cold ether (100 mL) was added, the polymer was

filtered off and filtrate was subjected to evaporation. The residue was dried under

vacuum, and and was purified by silica gel column and eluted with a mixture of ethyl

acetate and hexane (1:4) to get the title compounds **14** as a pale yellow solid in 94 %

yield.

### **General Procedure for the synthesis of methyl**

#### **2-(12b-methyl-1,2,3,12b-tetrahydropyrrolo[1,2-a:2,1-c]quinoxalin-6-yl)-1-isobu** **tyl-1H-benzo[d]imidazole-5-carboxylate 15.**

To a stirred solution of polymer bound

2-(3-amino-4-(1H-pyrrol-1-yl)phenyl)-1-isobutyl-1H-benzo[d]imidazole-5-carboxylat

e conjugates **8a** (1.5 gm, 0.32 mm, 1.0 equiv) in MeOH (10 mL), pent-4-yn-1-ol

(0.08 gm, 0.95 mmol, 3.0 equiv), PtCl<sub>4</sub> (5.3 mg, 5 mol-%) were added in 50 mL flask

under argon atmosphere. The mixture was stirred at at 100 °C for 24 h. After

completion of the reaction time, reaction mixture was filtered through celite pad.

The crude product mixtures were purified by precipitation with cold ether (100 mL×3)

and dried to obtain the polymer bound conjugate **15** in high purity. To a solution of

conjugates **15** in methanol (20 mL), KCN (100 mg) was added and stirred for 24 hours at room temperature. After completion of the reaction, excess of cold ether (100 mL) was added, the polymer was filtered off and filtrate was subjected to evaporation. The residue was dried under vacuum. The residue was purified by flash silica gel column chromatography as a white solid in 81 % yield.

**General Procedure for the synthesis of methyl 1-isobutyl-2-(10-phenyl-15*bH*-isoquino[2,1-*a*]pyrrolo[2,1-*c*]quinoxalin-7-yl)-1*H*-benzimidazole-5-carboxylate **16**.**

To a stirred solution of polymer bound 2-(3-amino-4-(1*H*-pyrrol-1-yl)phenyl)-1-isobutyl-1*H*-benzo[*d*]imidazole-5-carboxylate conjugates **8a** (1.5 gm, 0.32 mmol, 1.0 equiv) in DCE (10 mL), 2-(phenylethynyl)benzaldehyde (0.19 gm, 0.95 mmol, 3.0 equiv), AuCl<sub>3</sub> (3.6 mg, 5 mol-%) were added in 50 mL flask under nitrogen atmosphere. The mixture was stirred at room temperature for 12 h. After completion of the reaction time, reaction mixture was filtered through celite pad. The crude product mixtures were purified by precipitation with cold ether (100 mL×3) and dried to obtain the polymer bound conjugate **16** in high purity. To a solution of conjugates **15** in methanol (20 mL), KCN (100 mg) was added and stirred for 24 hours at room temperature. After completion of the reaction, excess of cold ether (100 mL) was added, the polymer was filtered off and filtrate was subjected to evaporation. The residue was dried under vacuum. The

S163

residue was purified by flash silica gel column chromatography as a pale yellow solid in 79 % yield.

**General Procedure for the synthesis of methyl**

**1-isobutyl-2-(4-methyl-4-phenyl-4,5-dihydropyrrolo[1,2-*a*]quinoxalin-7-yl)-1*H*-be**

**nzimidazole-5-carboxylate 17.** To a stirred solution of polymer bound

2-(3-amino-4-(1*H*-pyrrol-1-yl)phenyl)-1-isobutyl-1*H*-benzo[*d*]imidazole-5-carboxylat

e conjugates **8a** (1.5 gm, 0.32 mm, 1.0 equiv) in toluene (10 mL), phenyl

acetylene (0.10 gm, 0.95 mmol, 3.0 equiv), AgOTf (8.1 mg, 10 mol-%) were added in

50 mL flask under nitrogen atmosphere. The mixture was heated with stirring for 24 h.

After completion of the reaction time, reaction mixture was filtered through celite pad.

The crude product mixtures were purified by precipitation with cold ether (100 mL×3)

and dried to obtain the polymer bound conjugate **17** in high purity. To a solution of

conjugates **15** in methanol (20 mL), KCN (100 mg) was added and stirred for 24

hours at room temperature. After completion of the reaction, excess of cold ether

(100 mL) was added, the polymer was filtered off and filtrate was subjected to

evaporation. The residue was dried under vacuum. The residue was purified by flash

silica gel column chromatography as a white solid in 65 % yield.
